# Supplementary material for: Synthesis and properties of chiral fluorescent helicene-BODIPY conjugates
Source: Royal Society of Chemistry journal article supplement (doi:10.1039/d0ob01809k), 2020-01-01
Supplement: d0ob01809k1.pdf [file d0ob01809k1.pdf]

# Synthesis and Properties of Chiral Fluorescent Helicene-BODIPY Conjugates

## Supporting Information

Pau Moneva Lorente,<sup>a</sup> Antoine Wallabregue,<sup>a</sup> Francesco Zinna,<sup>b</sup> Céline Besnard,<sup>c</sup> Lorenzo Di Bari,<sup>b</sup> Jérôme Lacour\*,<sup>a</sup>

<sup>a</sup> Department of Organic Chemistry, University of Geneva, Quai Ernest Ansermet 30, 1211 Geneva 4, Switzerland

<sup>b</sup> Università di Pisa, Dipartimento di Chimica e Chimica Industriale, Via G. Moruzzi 13, 56124 Pisa, Italy

<sup>c</sup> Laboratory of Crystallography, University of Geneva, Quai Ernest Ansermet 24, 1211 Geneva 4, Switzerland  
Supporting Information Placeholder

## Contents

|                                                                       |     |
|-----------------------------------------------------------------------|-----|
| 1. General Information and Apparatus                                  | S2  |
| 2. Synthesis and characterization of compounds                        | S6  |
| 3. Optimization of the two-step one-pot procedure                     | S48 |
| 4. (Chir)optical properties                                           | S49 |
| 5. Electrochemical properties                                         | S52 |
| 6. Computed energies and Cartesian coordinates of compounds <b>4a</b> | S53 |
| 7. Vertical excitations of BODIPY compounds <b>4a</b>                 | S65 |
| 8. Frontier Molecular Orbitals of BODIPYs <b>4a</b>                   | S83 |
| 9. Computed spin densities of compound <b>4aA</b>                     | S84 |
| 10. Crystal data and structure refinement for compound <b>4aE</b>     | S88 |
| 11. References                                                        | S90 |

# 1. General Information and Apparatus

## Reagents

Unless otherwise stated, reagents were purchased from commercial sources and used without further purification. All reactions involving air sensitive compounds were carried out under N<sub>2</sub> *via* an inert gas/vacuum double manifold line and standard Schlenk techniques using dry solvents. Reactions involving oxygen-sensitive reagents were performed using degassed solvents.

## Microwaves

MW reactions were performed in a Biotage Initiator Robot with Robot Sixty set up for high absorption solvent without previous stirring.

## Chromatography

**Analytical thin-layer chromatographies** (TLCs) were performed with Silica gel 60 F<sub>254</sub> aluminium plates purchased from Merck. **Flash column chromatographies** were performed with Silica SiliaFlash P60, 40-63 μm (230-400 mesh) and with CombiFlash® R<sub>f</sub> 200 on SiO<sub>2</sub> 4 g, 12 g and 24 g cartridges. **Retardation factors** (*R<sub>f</sub>*) were measured on TLC Aluminium oxide 60 F<sub>254</sub>, neutral or basic plates purchased from Merck. Enantiopure materials were obtained by chiral stationary phase **HPLC** resolution on an Agilent 1260 Infinity II apparatus (quaternary pump, auto sampler, column thermostat and diode array detector) using a semi-preparative CHIRALPAK® IG column (250 x 10 mm, 5 mic) and HPLC grade solvents.

## Infrared

IR spectra were recorded with a Perkin-Elmer 100 FT-IR spectrometer using a diamond ATR Golden Gate sampling and are reported in wavenumbers ( $\text{cm}^{-1}$ ).

## Nuclear Magnetic Resonance

NMR spectra were recorded on a Bruker AVANCE I 300 MHz spectrometer (equipped with a 5 mm QNP D133 probe), on a Bruker AVANCE III HD-*NanoBay* 300 MHz spectrometer (equipped with a 5 mm BB(F)-H-D probe), on a Bruker AVANCE III HD-*NanoBay* 400 MHz spectrometer (equipped with a 5 mm CryoProbe Prodigy) or on a Bruker II 500 MHz spectrometer (equipped with a 5 mm Cryogenic DCH ( $^1\text{H}/^{13}\text{C}$ ) probe).  **$^1\text{H}$  NMR**: chemical shifts are given in ppm relative to  $\text{Me}_4\text{Si}$  with solvent resonances used as internal standards ( $\text{CD}_2\text{Cl}_2$   $\delta = 5.32$  ppm). Data are reported as follows: chemical shift (ppm) on the  $\delta$  scale, multiplicity (s = singlet, brs = broad singlet, d = doublet, t = triplet, dd = doublet of doublets, dt = doublet of triplets, ddd = doublet of doublet of doublets, ddt = doublet of doublet of triplets, td = triplet of doublets and m = multiplet), coupling constant (Hz) and integration.  **$^{13}\text{C}$  NMR**: chemical shifts are given in ppm relative to  $\text{Me}_4\text{Si}$  with solvent resonances used as internal standards ( $\text{CD}_2\text{Cl}_2$   $\delta = 54.00$  ppm).  **$^{19}\text{F}$  NMR** chemical shifts are given in ppm.

## Mass Spectrometry

**ESI-MS** spectra were obtained in methanol solutions on an API 150EX (AB/MDS Sciex) spectrometer in positive polarity. **HRMS** spectra were obtained in methanol solutions on a QSTAR Pulsar (AB/MDS Sciex) spectrometer in positive polarity by the Department of Mass Spectroscopy at the University of Geneva.

## Cyclic Voltammetry

Potentiodynamic electrochemical measurements were carried out on an Electrochemical Analyzer with Picoamp booster and Faraday cage (CH Instruments 660C).

## (Chir)optical measurements

**Optical rotations** were measured on a Perkin Elmer 241 polarimeter at 20 °C using a Hg lamp (365 nm). **UV-Vis** absorption spectra were recorded on a JASCO V-650 spectrophotometer at 20 °C. Measurements were performed in acetonitrile analytical grade at precise concentrations. **Electronic Circular Dichroism** (ECD) spectra were recorded on a JASCO J-815 spectrophotometer at 20 °C. Measurements were performed in analytical grade acetonitrile at precise concentrations. **Circularly Polarized Luminescence** (CPL) measurements were carried out with a home-built apparatus,<sup>[1]</sup> on acetonitrile diluted solutions with an optical density < 0.1, under 517 nm irradiation from a LED source (90° geometry). **Steady-state fluorescence** spectra were measured using a Varian Cary 50 Eclipse spectrofluorimeter in analytical grade acetonitrile at precise concentrations. All fluorescence spectra were corrected for the wavelength-dependent sensitivity of the detection. **Fluorescence quantum yields** ( $\Phi_F$ ) were measured in a diluted solution with an optical density < 0.1 using the following equation:

$$\Phi_s = \Phi_r \cdot \left(\frac{A_r}{A_s}\right) \cdot \left(\frac{D_s}{D_r}\right) \cdot \left(\frac{\eta_s}{\eta_r}\right)^2$$

where “r” and “s” stand for reference and sample respectively, A is the absorbance at the excitation wavelength, D is the integrated intensity and  $\eta$  is the refractive index of the solvent. The fluorescence quantum yields were measured relative to cresyl violet ( $\Phi_F = 54\%$  in methanol). Excitations of reference and sample compounds were performed at the same wavelength.

## Computational details

DFT calculations were performed with the Gaussian 09 software package, revision D.01.<sup>[2]</sup> All optimized **geometries** were assigned to a minimum by frequency calculations with the Berny algorithm<sup>[3]</sup> at the hybrid B3LYP<sup>[4]</sup> or CAM-B3LYP<sup>[5]</sup> level of theory. Optimizations were carried out in gas phase without any constraints at 298 K and 1 atm. Chlorine atom was represented by the Relativistic Effective Core Potential (RECP) of the Stuttgart group and the associated

basis sets<sup>[6]</sup> augmented by a d-polarization function.<sup>[7]</sup> The remaining atoms (C, H, O, N, B, F) were represented by the 6-311G(d,p) Pople basis set.<sup>[8]</sup> All **energies** are reported in Hartrees as Self-Consistent Field (SCF) energies along with their corrections. **Solvent** effects were assessed through the integral equation formalism variant of the Polarizable Continuum Model (IEFPCM)<sup>[9]</sup> with default parameters for acetonitrile. **Electronic vertical excitations** were calculated with TD-DFT at the B3LYP/6-311G(d,p) level of theory in gas phase. Data are reported as follows: transition number, wavelength (nm), energy (eV), oscillator strength (cgs), Molecular Orbitals involved in the transition, CI coefficient and contribution (%). Only transitions with  $\geq 25\%$  contribution are reported. **Frontier Molecular Orbitals** were computed at the B3LYP/6-311G(d,p) level of theory in gas phase and the pictures rendered with Visual Molecular Dynamics (VMD) software, version 1.9.1.<sup>[10]</sup> **Electrostatic Potential Surfaces** were computed at the B3PW91<sup>[11]</sup>/6-311G(d,p) level of theory in gas phase. **Spin densities** are reported with hydrogens summed into heavy atoms.

## Crystallography

All data were collected on an Agilent supernova using Cu K $\alpha$ 1 radiation. Refinements were carried out in the SHELXL<sup>[12]</sup> program, within the *Olex2*<sup>[13]</sup> graphical software. Details for the refinement of each structure are reported along with a representation of the cation and the content of the asymmetric units shown as displacement ellipsoids (drawn at 50 percent probability). For disordered structures, comments on the modeling of the disorder are included.

## 2. Synthesis and characterization of compounds

### General procedure for the formylation of quinacridinium salts **5**

To a solution of quinacridinium salt **5** (1.0 equiv) in DMF (12 equiv) is slowly added POCl<sub>3</sub> (24 equiv). The reaction mixture is allowed to stir for 17 h at 40 °C. After complete consumption of quinacridinium **5** (monitored by ESI-MS analysis of the crude sample), the reaction mixture is brought to 0 °C and stirred for 5 min. Then, small pieces of ice are carefully and slowly added one by one until bubbling is no longer observed, and the reaction mixture is allowed to stir for 1 h at 25 °C. The product is extracted with CH<sub>2</sub>Cl<sub>2</sub> and washed several times with a solution of LiCl (10 wt%) until the organic phase is no longer colorful. Then, the organic phase is washed with a solution of HBF<sub>4</sub> 1 M and subsequently washed with a solution of NaOH 1.5 M. The organic phase is dried over Na<sub>2</sub>SO<sub>4</sub> and concentrated in vacuo. Flash chromatography using silica gel with CH<sub>2</sub>Cl<sub>2</sub>/MeOH (100:0 to 98:2 gradient) affords formylated derivatives in the neutral form. Finally, dissolution of the compounds in CH<sub>2</sub>Cl<sub>2</sub> and acidification with a solution of HBF<sub>4</sub> 1 M affords the desired derivatives **6** as dark purple solids.

**8-Formyl-1,13-dimethoxy-5-propyl-5,9-dihydro-13bH-quinolino[2,3,4-kl]acridin-13b-ylum tetrafluoroborate (6a)**

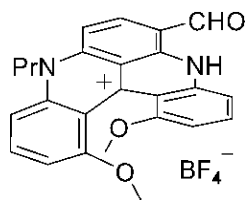

Prepared according to the general procedure, using 1.99 g (4.34 mmol) of quinacridinium salt **5a**, 4 mL (52.1 mmol) of DMF and 9.8 mL (104 mmol) of POCl<sub>3</sub>. The desired compound was isolated as a dark purple solid (1.67 g, 3.42 mmol, 79%).

**R<sub>f</sub>** (neutral Al<sub>2</sub>O<sub>3</sub>, CH<sub>2</sub>Cl<sub>2</sub>/MeOH, 97:3): 0.45. **UV/Vis** (CH<sub>3</sub>CN, C = 5·10<sup>-6</sup> M, λ<sub>abs</sub> (ε)): 561 nm (12900 L·mol<sup>-1</sup>·cm<sup>-1</sup>). **IR** (CH<sub>2</sub>Cl<sub>2</sub>):  $\bar{\nu}$  2926, 1597, 1509, 1468, 1350, 1264, 1232, 1166, 1057, 784, 543, 527, 511 cm<sup>-1</sup>. **<sup>1</sup>H NMR** (400 MHz, CD<sub>2</sub>Cl<sub>2</sub>): δ 10.19 (s, 1H, CHO), 8.51 (d, *J* = 8.8 Hz, 1H, CH), 8.05 (t, *J* = 8.5 Hz, 1H, CH), 7.98 (t, *J* = 8.2, 1H, CH), 7.52 (dd, *J* = 8.9, 4.2 Hz, 2H, 2 x CH), 7.46 (d, *J* = 8.4 Hz, 1H, CH), 7.04 (d, *J* = 8.1 Hz, 1H, CH), 7.00 (d, *J* = 8.1 Hz, 1H, CH), 4.78-4.68 (m, 1H, CH<sub>2</sub>), 4.60-4.50 (m, 1H, CH<sub>2</sub>), 3.83 (d, *J* = 6.0 Hz, 6H, 2 x OCH<sub>3</sub>), 2.25-2.11 (m, 2H, CH<sub>2</sub>), 1.28 (t, *J* = 7.4 Hz, 3H, CH<sub>3</sub>) ppm. **<sup>13</sup>C NMR** (101 MHz, CD<sub>2</sub>Cl<sub>2</sub>): δ 193.21, 160.84, 159.88, 143.76, 143.29, 142.74, 142.34, 140.16, 139.45, 138.88, 138.31, 117.40, 114.11, 113.51, 110.97, 110.29, 107.98, 105.41, 105.27, 56.49, 56.42, 20.67, 11.38 ppm. **<sup>19</sup>F NMR** (282 MHz, CD<sub>2</sub>Cl<sub>2</sub>): δ -152.27 (brs, 20%), -152.32 (brs, 80%) (4F, BF<sub>4</sub>) ppm. **HRMS (ESI)** calculated for [C<sub>25</sub>H<sub>23</sub>N<sub>2</sub>O<sub>3</sub> (M<sup>+</sup>)]: 399.1703 m/z; found: 399.1708 m/z.

**8-Formyl-1,13-dimethoxy-5-phenyl-5,9-dihydro-13bH-quinolino[2,3,4-kl]acridin-13b-ylidium tetrafluoroborate (6b)**

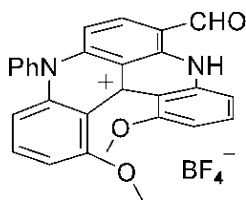

Prepared according to the general procedure, using 100 mg (0.25 mmol) of quinacridinium salt **5b**, 0.23 mL (2.97 mmol) of DMF and 0.65 mL (6.92 mmol) of POCl<sub>3</sub>. The reaction was allowed to stir for 1 h at 90 °C. The desired compound was isolated as a dark purple solid (88 mg, 0.19 mmol, 75%).

**R<sub>f</sub>** (neutral Al<sub>2</sub>O<sub>3</sub>, CH<sub>2</sub>Cl<sub>2</sub>/MeOH, 97:3): 0.60. **UV/Vis** (CH<sub>3</sub>CN, C = 5·10<sup>-6</sup> M, λ<sub>abs</sub> (ε)): 563 nm (6000 L·mol<sup>-1</sup>·cm<sup>-1</sup>). **IR (CH<sub>2</sub>Cl<sub>2</sub>)**:  $\bar{\nu}$  1652, 1597, 1504, 1468, 1405, 1346, 1263, 1228, 1179, 1061, 1038, 816, 785, 753, 703, 547 cm<sup>-1</sup>. **<sup>1</sup>H NMR** (500 MHz, CD<sub>2</sub>Cl<sub>2</sub>): δ 10.14 (s, 1H, CHO), 8.24 (d, *J* = 8.9 Hz, 1H, CH), 8.02 (t, *J* = 8.3 Hz, 1H, CH), 7.89-7.83 (m, 3H, 3 x CH), 7.79 (dd, *J* = 8.8, 8.1 Hz, 1H, CH), 7.54-7.51 (m, 1H, CH), 7.50 (dd, *J* = 8.4, 0.9 Hz, 1H, CH), 7.45-7.42 (m, 1H, CH), 7.04 (d, *J* = 11.2 Hz, 1H, CH), 7.02 (d, *J* = 11.2 Hz, 1H, CH), 6.73 (d, *J* = 8.8 Hz, 1H, CH), 6.69 (dd, *J* = 8.7, 0.8 Hz, 1H, CH), 3.87 (d, *J* = 8.3 Hz, 6H, 2 x OCH<sub>3</sub>) ppm. **<sup>13</sup>C NMR** (126 MHz, CD<sub>2</sub>Cl<sub>2</sub>): δ 193.22, 160.65, 160.14, 144.77, 144.55, 143.96, 142.22, 140.73, 139.34, 138.77, 138.39, 137.60, 132.93, 132.12, 131.92, 129.37, 128.19, 116.92, 113.78, 113.57, 111.15, 110.40, 109.86, 106.89, 105.55, 105.45, 56.53 ppm. **<sup>19</sup>F NMR** (282 MHz, CD<sub>2</sub>Cl<sub>2</sub>): δ -152.70 (brs, 20%), -152.76 (brs, 80%) (4F, BF<sub>4</sub>) ppm. **HRMS (ESI)** calculated for [C<sub>28</sub>H<sub>21</sub>N<sub>2</sub>O<sub>3</sub> (M<sup>+</sup>)]: 433.1547 m/z; found: 433.1547 m/z.



## General procedure for the synthesis of BODIPYs of type 4a

To a solution of quinacridinium salt **6** (1.0 equiv) and a spatula tip of powder molecular sieves (4 Å) in CH<sub>3</sub>CN (0.05 M), the corresponding amine (1.1 equiv) is added. Pyrrolidine (10 mol%), is finally added and the reaction mixture is allowed to stir for 6 h at 25 °C. After complete consumption of quinacridinium **6a** (monitored by ESI-MS analysis of the crude sample), the solvent is evaporated and the crude used for the next step.

To a solution of the crude imine in dry and degassed CH<sub>2</sub>Cl<sub>2</sub> (0.05 M), DIPEA (5.5 equiv) is added. After 5 min of stirring, BF<sub>3</sub>·OEt<sub>2</sub> (48 wt% solution) (7.0 equiv) is slowly added and the reaction mixture is allowed to stir at 25 °C for 8 hours. After complete consumption of iminium intermediate **7** (monitored by ESI-MS analysis of the crude sample), H<sub>2</sub>O is added and the product is extracted with CH<sub>2</sub>Cl<sub>2</sub> (x3). The combined organic phases are assembled and a final wash with a solution of NaBF<sub>4</sub> 0.2 M is done. The organic layer is dried over Na<sub>2</sub>SO<sub>4</sub> and concentrated *in vacuo*. Flash chromatography using silica gel with CH<sub>2</sub>Cl<sub>2</sub>/MeOH (100:0 to 98:2 gradient), followed by selective precipitations with Et<sub>2</sub>O affords the title BODIPY derivatives **4a** as dark red solids.

**6,6-Difluoro-1,15-dimethoxy-7-(4-methoxyphenyl)-11-propyl-6,11-dihydro-15bH-6 $\lambda^4$ ,7 $\lambda^4$ -  
[1,3,2]diazaborinino[5,4,3-de]quinolino[4,3,2-mn]acridin-15b-ylum tetrafluoroborate  
(4aA)**

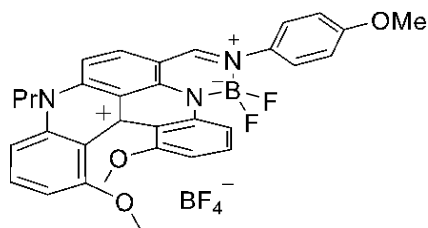

Prepared according to the general procedure, using 51 mg (0.10 mmol) of quinacridinium salt **6a**, 14.1 mg (0.11 mmol) of *p*-anisidine and 0.9  $\mu$ L (0.01 mmol) of pyrrolidine in 2 mL of CH<sub>3</sub>CN, and 101  $\mu$ L of DIPEA (0.57 mmol) and 192  $\mu$ L (0.73 mmol) of BF<sub>3</sub>·OEt<sub>2</sub> (48 wt%) in 2 mL of dry and degassed CH<sub>2</sub>Cl<sub>2</sub>. The desired compound was isolated as a dark red solid (43 mg, 0.07 mmol, 65%).

**R<sub>f</sub>** (basic Al<sub>2</sub>O<sub>3</sub>, CH<sub>2</sub>Cl<sub>2</sub>/MeOH, 97:3): 0.28. **UV/Vis** (CH<sub>3</sub>CN, C = 10<sup>-5</sup> M,  $\lambda_{\text{abs}}$  ( $\epsilon$ )): 559 nm (12700 L·mol<sup>-1</sup>·cm<sup>-1</sup>). **IR (neat)**:  $\bar{\nu}$  1599, 1583, 1554, 1506, 1469, 1454, 1377, 1334, 1279, 1255, 1207, 1170, 1023, 1009, 834, 821, 786, 756, 680, 659, 609, 563 cm<sup>-1</sup>. **<sup>1</sup>H NMR** (400 MHz, CD<sub>2</sub>Cl<sub>2</sub>):  $\delta$  8.88 (brs, 1H, CH), 8.56 (d, *J* = 9.0 Hz, 1H, CH), 8.34 (dt, *J* = 9.1, 3.2 Hz, 1H, CH), 8.02 (t, *J* = 8.5 Hz, 1H, CH), 7.95 (dd, *J* = 9.1, 7.9 Hz, 1H, CH), 7.68-7.63 (m, 2H, 2  $\times$  CH), 7.54 (dd, *J* = 9.0, 6.8 Hz, 2H, 2  $\times$  CH), 7.11-7.06 (m, 2H, 2  $\times$  CH), 7.02 (t, *J* = 8.4 Hz, 2H, 2  $\times$  CH), 4.78-4.67 (m, 1H, CH<sub>2</sub>), 4.63-4.51 (m, 1H, CH<sub>2</sub>), 3.89 (s, 3H, OCH<sub>3</sub>), 3.78 (d, *J* = 3.4 Hz, 6H, 2  $\times$  OCH<sub>3</sub>), 2.27-2.14 (m, 2H, CH<sub>2</sub>), 1.28 (t, *J* = 7.3 Hz, 3H, CH<sub>3</sub>) ppm. **<sup>13</sup>C NMR** (101 MHz, CD<sub>2</sub>Cl<sub>2</sub>):  $\delta$  161.05, 160.99, 160.49, 159.61, 145.36, 142.96, 141.21, 140.18, 138.09, 137.18, 135.76, 126.04, 117.05, 117.02, 115.42, 115.23, 114.22, 114.11, 114.03, 103.92, 108.01, 106.92, 106.36, 105.48, 105.16, 56.38, 56.26, 56.19, 52.82, 20.84, 11.37 ppm. **<sup>19</sup>F NMR** (282 MHz, CD<sub>2</sub>Cl<sub>2</sub>):  $\delta$  -(116.27-117.02) (m, 1F, BF<sub>2</sub>), -(120.66-121.38) (m, 1F, BF<sub>2</sub>), -151.74 (s, 20%), -151.80 (s, 80%) (4F, BF<sub>4</sub>) ppm. **HRMS (ESI)** calculated for [C<sub>32</sub>H<sub>29</sub>BF<sub>2</sub>N<sub>3</sub>O<sub>3</sub> (M<sup>+</sup>): 552.2265 m/z; found: 552.2264 m/z.



**6,6-Difluoro-1,15-dimethoxy-7-phenyl-11-propyl-6,11-dihydro-15bH-6 $\lambda^4$ ,7 $\lambda^4$ -**

**[1,3,2]diazaborinino[5,4,3-de]quinolino[4,3,2-mn]acridin-15b-ylum tetrafluoroborate  
(4aC)**

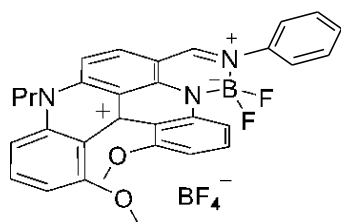

Prepared according to the general procedure, using 50 mg (0.10 mmol) of quinacridinium salt **6a**, 10  $\mu$ L (0.11 mmol) of aniline and 0.9  $\mu$ L (0.01 mmol) of pyrrolidine in 2 mL of CH<sub>3</sub>CN, and 100  $\mu$ L of DIPEA (0.57 mmol) and 192  $\mu$ L (0.73 mmol) of BF<sub>3</sub>·OEt<sub>2</sub> (48 wt%) in 2 mL of dry and degassed CH<sub>2</sub>Cl<sub>2</sub>. The desired compound was isolated as a dark red solid (49 mg, 0.08 mmol, 78%).

**R<sub>f</sub>** (basic Al<sub>2</sub>O<sub>3</sub>, CH<sub>2</sub>Cl<sub>2</sub>/MeOH, 97:3): 0.28. **UV/Vis** (CH<sub>3</sub>CN, C = 10<sup>-5</sup> M,  $\lambda_{\text{abs}}$  ( $\epsilon$ )): 555 nm (10300 L·mol<sup>-1</sup>·cm<sup>-1</sup>). **IR (neat)**:  $\bar{\nu}$  1597, 1580, 1549, 1512, 1493, 1469, 1378, 1332, 1279, 1262, 1208, 1107, 1055, 1024, 1007, 867, 823, 781, 754, 732, 698, 658, 617, 578 cm<sup>-1</sup>. **<sup>1</sup>H NMR** (400 MHz, CD<sub>2</sub>Cl<sub>2</sub>):  $\delta$  8.88 (brs, 1H, CH), 8.55 (d, *J* = 9.1 Hz, 1H, CH), 8.37 (dt, *J* = 9.2, 3.2 Hz, 1H, CH), 8.04 (t, *J* = 8.5 Hz, 1H, CH), 7.97 (dd, *J* = 9.1, 8.0 Hz, 1H, CH), 7.75-7.69 (m, 2H, 2  $\times$  CH), 7.64-7.53 (m, 5H, 5  $\times$  CH), 7.03 (dd, *J* = 9.7, 8.1 Hz, 1H, CH), 4.80-4.69 (m, 1H, CH<sub>2</sub>), 4.65-4.54 (m, 1H, CH<sub>2</sub>), 3.79 (d, *J* = 3.9 Hz, 6H, 2  $\times$  OCH<sub>3</sub>), 2.29-2.15 (m, 2H, CH<sub>2</sub>), 1.29 (t, *J* = 7.4 Hz, 3H, CH<sub>3</sub>) ppm. **<sup>13</sup>C NMR** (126 MHz, CD<sub>2</sub>Cl<sub>2</sub>):  $\delta$  161.13, 159.94, 159.05, 145.08, 142.49, 142.44, 142.40, 142.25, 140.60, 137.58, 136.73, 129.85, 129.56, 124.42, 113.73, 113.56, 113.50, 113.48, 113.41, 107.47, 105.94, 105.02, 104.70, 55.83, 55.64, 52.33, 20.32, 10.82 ppm. **<sup>19</sup>F NMR** (282 MHz, CD<sub>2</sub>Cl<sub>2</sub>):  $\delta$  -(116.44-117.18) (m, 1F, BF<sub>2</sub>), -(120.81-121.54) (m, 1F, BF<sub>2</sub>), -152.57 (s, 20%), -(152.61-152.63) (m, 80%) (4F, BF<sub>4</sub>) ppm. **HRMS (ESI)** calculated for [C<sub>31</sub>H<sub>27</sub>BF<sub>2</sub>N<sub>3</sub>O<sub>2</sub> (M<sup>+</sup>): 522.2159 m/z; found: 522.2166 m/z.

**6,6-Difluoro-1,15-dimethoxy-7,11-diphenyl-6,11-dihydro-15bH-6λ<sup>4</sup>,7λ<sup>4</sup>-**

**[1,3,2]diazaborinino[5,4,3-de]quinolino[4,3,2-mn]acridin-15b-ylum tetrafluoroborate**  
**(4bC)**

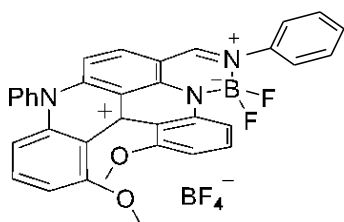

To a solution of quinacridinium salt **6b** (40 mg, 0.08 mmol) and a spatula tip of powder molecular sieves (4 Å) in CH<sub>3</sub>CN (2 mL, 0.04 M), aniline (7.7 μL, 85 μmol, 1.1 equiv) was added and the reaction mixture was allowed to stir for 1 h at 60 °C. After complete consumption of quinacridinium **6b** (monitored by ESI-MS analysis of the crude sample), the crude reaction mixture was cooled down to 25 °C and the solvent evaporated. To this mixture, dry and degassed CH<sub>2</sub>Cl<sub>2</sub> (4 mL, 0.02 M) and DIPEA (74 μL, 0.43 mmol, 5.5 equiv) were added. After 5 min of stirring, BF<sub>3</sub>·OEt<sub>2</sub> (48 wt% solution) (66 μL, 0.54 mmol, 7.0 equiv) was slowly added and the reaction mixture was allowed to stir at 25 °C for 12 hours. After complete consumption of iminium intermediate **7** (monitored by ESI-MS analysis of the crude sample), H<sub>2</sub>O was added and the product extracted with CH<sub>2</sub>Cl<sub>2</sub> (x3). The combined organic phases were assembled and a final wash with a solution of NaBF<sub>4</sub> 0.2 M was done. The organic layer was dried over Na<sub>2</sub>SO<sub>4</sub> and concentrated *in vacuo*. Flash chromatography using silica gel with CH<sub>2</sub>Cl<sub>2</sub>/MeOH (100:0 to 98:2 gradient), followed by selective precipitations with Et<sub>2</sub>O afforded BODIPY derivative **4bC** as a dark red solid (39 mg, 0.06 mmol, 82%).

**R<sub>f</sub>** (basic Al<sub>2</sub>O<sub>3</sub>, CH<sub>2</sub>Cl<sub>2</sub>/MeOH, 98:2): 0.50. **UV/Vis** (CH<sub>3</sub>CN, C = 10<sup>-5</sup> M, λ<sub>abs</sub> (ε)): 559 nm (5600 L·mol<sup>-1</sup>·cm<sup>-1</sup>). **IR** (CH<sub>2</sub>Cl<sub>2</sub>):  $\bar{\nu}$  2921, 2852, 1712, 1598, 1550, 1506, 1463, 1377, 1318, 1264, 1202, 1058, 1021, 860, 751, 721, 699, 590, 569, 552, 539, 528, 520 cm<sup>-1</sup>. **<sup>1</sup>H NMR** (400 MHz, CD<sub>2</sub>Cl<sub>2</sub>): δ 8.86 (brs, 1H, CH), 8.40 (dt, J = 9.1, 3.2 Hz, 1H, CH), 8.30 (d, J = 9.1, 1H, CH), 8.01 (dd, J = 9.1, 8.0 Hz, 1H, CH), 7.90-7.83 (m, 3H, 3 x CH), 7.79 (t, J = 8.5 Hz, 1H, CH), 7.74-7.69 (m, 2H, 2 x CH), 7.64-7.54 (m, 4H, 4 x CH), 7.50-7.45 (m, 1H, CH), 7.04 (dd, J = 15.9, 8.0 Hz, 2H, 2 x CH), 6.79 (d, J = 9.0, 1H, CH), 6.73 (d, J = 8.8 Hz, 1H, CH), 3.83 (d, J = 2.3 Hz, 6H, 2 x OCH<sub>3</sub>) ppm. **<sup>13</sup>C NMR** (126 MHz, CD<sub>2</sub>Cl<sub>2</sub>): δ 160.5, 159.0, 158.6, 145.5, 142.5, 142.2, 141.5, 141.4, 141.2, 139.1, 136.4, 136.3, 131.5, 130.7, 130.7, 129.1, 128.8, 128.0, 126.8, 123.6, 115.15,

114.1, 112.8, 112.7, 112.7, 112.4, 108.7, 106.8, 105.7, 104.4, 104.0 ppm.  $^{19}\text{F}$  NMR (282 MHz,  $\text{CD}_2\text{Cl}_2$ ):  $\delta$  -(115.87-116.62) (m, 1F,  $\text{BF}_2$ ), -(119.83-120.54) (m, 1F,  $\text{BF}_2$ ), -151.79 (s, 20%), -151.84 (s, 80%) (4F,  $\text{BF}_4$ ) ppm. **HRMS (ESI)** calculated for  $[\text{C}_{34}\text{H}_{25}\text{B}_2\text{F}_6\text{N}_3\text{O}_2 (\text{M}^+)]$ : 556.2002 m/z; found: 556.2000 m/z.

**7-(4-Chlorophenyl)-6,6-difluoro-1,15-dimethoxy-11-propyl-6,11-dihydro-15bH-6 $\lambda^4$ ,7 $\lambda^4$ -[1,3,2]diazaborinino[5,4,3-de]quinolino[4,3,2-mn]acridin-15b-ylum tetrafluoroborate (4aD)**

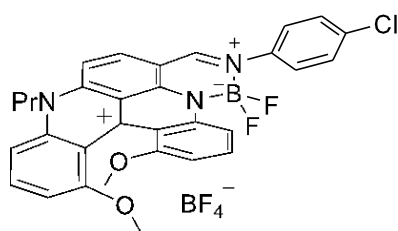

Prepared according to the general procedure, using 52 mg (0.11 mmol) of quinacridinium salt **6a**, 15.3 mg (0.12 mmol) of *p*-chloroaniline and 0.9  $\mu\text{L}$  (0.01 mmol) of pyrrolidine in 2 mL of  $\text{CH}_3\text{CN}$ , and 102  $\mu\text{L}$  of DIPEA (0.59 mmol) and 197  $\mu\text{L}$  (0.75 mmol) of  $\text{BF}_3\cdot\text{OEt}_2$  (48 wt%) in 2 mL of dry and degassed  $\text{CH}_2\text{Cl}_2$ . The desired compound was isolated as a light red solid (56 mg, 0.09 mmol, 82%).

$R_f$  (basic  $\text{Al}_2\text{O}_3$ ,  $\text{CH}_2\text{Cl}_2/\text{MeOH}$ , 97:3): 0.30. **UV/Vis** ( $\text{CH}_3\text{CN}$ ,  $\text{C} = 10^{-5}$  M,  $\lambda_{\text{abs}}$  ( $\epsilon$ )): 553 nm (11200  $\text{L}\cdot\text{mol}^{-1}\cdot\text{cm}^{-1}$ ). **IR (neat)**:  $\bar{\nu}$  1599, 1549, 1510, 1487, 1469, 1380, 1334, 1262, 1205, 1171, 1149, 1026, 1009, 822, 784, 754, 658, 578  $\text{cm}^{-1}$ .  $^1\text{H}$  NMR (500 MHz,  $\text{CD}_2\text{Cl}_2$ ):  $\delta$  8.92 (brs, 1H, CH), 8.59 (d,  $J = 9.1$  Hz, 1H, CH), 8.36 (dt,  $J = 9.1, 3.2$  Hz, 1H, CH), 8.03 (dd,  $J = 8.8, 8.1$  Hz, 1H, CH), 7.97 (dd,  $J = 9.1, 7.9$  Hz, 1H, CH), 7.72-7.68 (m, 2H, 2  $\times$  CH), 7.60-7.53 (m, 4H, 4  $\times$  CH), 7.03 (dd,  $J = 10.9, 8.0$  Hz, 2H, 2  $\times$  CH), 4.79-4.70 (m, 1H,  $\text{CH}_2$ ), 4.66-4.53 (m, 1H,  $\text{CH}_2$ ), 3.79 (d,  $J = 4.9$  Hz, 6H, 2  $\times$   $\text{OCH}_3$ ), 2.29-2.15 (m, 2H,  $\text{CH}_2$ ), 1.29 (t,  $J = 7.4$  Hz, 3H,  $\text{CH}_3$ ) ppm.  $^{13}\text{C}$  NMR (126 MHz,  $\text{CD}_2\text{Cl}_2$ ):  $\delta$  161.71, 160.51, 159.61, 145.75, 143.32, 142.95, 141.27, 141.13, 140.52, 138.15, 137.33, 136.04, 130.53, 126.39, 116.95, 115.28, 114.31, 114.10, 114.02, 113.95, 108.03, 106.65, 105.63, 105.33, 56.40, 56.20, 52.94, 20.90, 11.38 ppm.  $^{19}\text{F}$  NMR (282 MHz,  $\text{CD}_2\text{Cl}_2$ ):  $\delta$  -(116.37-117.11) (m, 1F,  $\text{BF}_2$ ), -(120.80-121.49) (m, 1F,  $\text{BF}_2$ ), -152.32 (brs, 20%), -(152.36-152.38) (brs, 80%) (4F,  $\text{BF}_4$ ) ppm. **HRMS (ESI)** calculated for  $[\text{C}_{31}\text{H}_{26}\text{BClF}_2\text{N}_3\text{O}_2 (\text{M}^+)]$ : 556.1769 m/z; found: 556.1792 m/z.

**6,6-Difluoro-1,15-dimethoxy-11-propyl-7-(4-(trifluoromethyl)phenyl)-6,11-dihydro-15bH-6λ<sup>4</sup>,7λ<sup>4</sup>-[1,3,2]diazaborinino[5,4,3-de]quinolino[4,3,2-mn]acridin-15b-ylum tetrafluoroborate (4aE)**

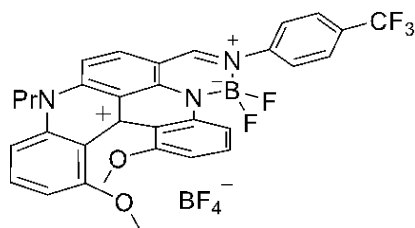

Prepared according to the general procedure, using 50 mg (0.10 mmol) of quinacridinium salt **6a**, 28  $\mu$ L (0.22 mmol) of *p*-(trifluoromethyl)aniline and 0.8  $\mu$ L (0.01 mmol) of pyrrolidine in 2 mL of CH<sub>3</sub>CN at 40 °C, and 99  $\mu$ L of DIPEA (0.56 mmol) and 189  $\mu$ L (0.71 mmol) of BF<sub>3</sub>·OEt<sub>2</sub> (48 wt%) in 2 mL of dry and degassed CH<sub>2</sub>Cl<sub>2</sub>. The desired compound was isolated as a dark red solid (20 mg, 0.03 mmol, 28%).

**R<sub>f</sub>** (basic Al<sub>2</sub>O<sub>3</sub>, CH<sub>2</sub>Cl<sub>2</sub>/MeOH, 97:3): 0.30. **UV/Vis** (CH<sub>3</sub>CN, C = 10<sup>-5</sup> M, λ<sub>abs</sub> (ε)): 550 nm (10900 L·mol<sup>-1</sup>·cm<sup>-1</sup>). **IR (neat)**:  $\bar{\nu}$  1599, 1549, 1510, 1468, 1378, 1324, 1281, 1261, 1209, 1170, 1052, 1025, 849, 822, 782, 753, 727, 660, 585 cm<sup>-1</sup>. **<sup>1</sup>H NMR** (400 MHz, CD<sub>2</sub>Cl<sub>2</sub>): δ 9.05 (brs, 1H, CH), 8.67 (d, *J* = 9.1 Hz, 1H, CH), 8.36 (dt, *J* = 9.1, 3.2 Hz, 1H, CH), 8.04 (t, *J* = 8.5 Hz, 1H, CH), 7.97 (dd, *J* = 9.1, 8.0 Hz, 1H, CH), 7.94-7.85 (m, 4H, 4 × CH), 7.57 (dd, *J* = 11.5, 9.0 Hz, 2H, 2 × CH), 7.04 (t, *J* = 8.4 Hz, 2H, 2 × CH), 4.80-4.69 (m, 1H, CH<sub>2</sub>), 4.65-4.54 (m, 1H, CH<sub>2</sub>), 3.79 (d, *J* = 3.7 Hz, 6H, 2 × OCH<sub>3</sub>), 2.29-2.15 (m, 2H, CH<sub>2</sub>), 1.29 (t, *J* = 7.5 Hz, 3H, CH<sub>3</sub>) ppm. **<sup>13</sup>C NMR** (101 MHz, CD<sub>2</sub>Cl<sub>2</sub>): δ 162.28, 160.53, 159.65, 145.96, 145.60, 143.80, 142.95, 142.86, 141.12, 140.70, 138.21, 137.35, 131.82, 131.49, 127.60, 127.57, 127.53, 127.49, 125.70, 123.01, 116.89, 115.30, 114.35, 114.11, 114.02, 113.93, 108.09, 106.87, 105.76, 105.44, 56.43, 56.23, 52.96, 30.26, 20.95, 11.37 ppm. **<sup>19</sup>F NMR** (282 MHz, CD<sub>2</sub>Cl<sub>2</sub>): δ -62.94 (s, 3F, CF<sub>3</sub>), -(115.78-116.53) (m, 1F, BF<sub>2</sub>), -(120.39-121.10) (m, 1F, BF<sub>2</sub>), -151.96 (s, 20%), -152.02 (m, 80%) (4F, BF<sub>4</sub>) ppm. **HRMS (ESI)** calculated for [C<sub>32</sub>H<sub>26</sub>BF<sub>5</sub>N<sub>3</sub>O<sub>2</sub> (M<sup>+</sup>)]: 590.2033 m/z; found: 590.2060 m/z.





**6,6-Difluoro-1,15-dimethoxy-7-(3-methoxyphenyl)-11-propyl-6,11-dihydro-15bH-6 $\lambda^4$ ,7 $\lambda^4$ -[1,3,2]diazaborinino[5,4,3-de]quinolino[4,3,2-mn]acridin-15b-ylum tetrafluoroborate (4aH)**

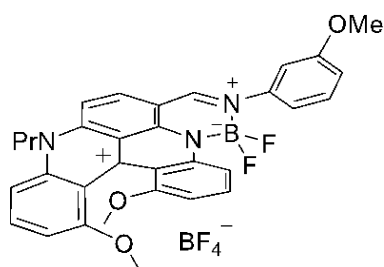

Prepared according to the general procedure, using 50 mg (0.10 mmol) of quinacridinium salt **6a**, 13  $\mu$ L (0.11 mmol) of *m*-anisidine and 0.8  $\mu$ L (0.01 mmol) of pyrrolidine in 2 mL of CH<sub>3</sub>CN, and 100  $\mu$ L of DIPEA (0.57 mmol) and 190  $\mu$ L (0.72 mmol) of BF<sub>3</sub>·OEt<sub>2</sub> (48 wt%) in 2 mL of dry and degassed CH<sub>2</sub>Cl<sub>2</sub>. The desired compound was isolated as a dark red solid (45 mg, 0.07 mmol, 69%).

**R<sub>f</sub>** (basic Al<sub>2</sub>O<sub>3</sub>, CH<sub>2</sub>Cl<sub>2</sub>/MeOH, 97:3): 0.30. **UV/Vis** (CH<sub>3</sub>CN, C = 10<sup>-5</sup> M,  $\lambda_{\text{abs}}$  ( $\epsilon$ )): 555 nm (9200 L·mol<sup>-1</sup>·cm<sup>-1</sup>). **IR (neat)**:  $\bar{\nu}$  1596, 1546, 1510, 1486, 1467, 1376, 1331, 1260, 1023, 781, 751, 718, 692, 618 cm<sup>-1</sup>. **<sup>1</sup>H NMR** (400 MHz, CD<sub>2</sub>Cl<sub>2</sub>):  $\delta$  8.89 (brs, 1H, CH), 8.55 (d, *J* = 9.1 Hz, 1H, CH), 8.37 (dt, *J* = 9.1, 3.2 Hz, 1H, CH), 8.03 (t, *J* = 8.4 Hz, 1H, CH), 7.96 (dd, *J* = 9.1, 7.9 Hz, 1H, CH), 7.56 (t, *J* = 8.7 Hz, 2H, 2 x CH), 7.50 (t, *J* = 8.1 Hz, 1H, CH), 7.30-7.25 (m, 2H, 2 x CH), 7.10 (ddd, *J* = 8.5, 2.5, 0.9 Hz, 1H, CH), 7.06-7.00 (m, 2H, 2 x CH), 4.80-4.69 (m, 1H, CH<sub>2</sub>), 4.65-4.54 (m, 1H, CH<sub>2</sub>), 3.92 (s, 3H, OCH<sub>3</sub>), 3.79 (d, *J* = 3.8 Hz, 6H, 2 x OCH<sub>3</sub>), 2.30-2.13 (m, 2H, CH<sub>2</sub>), 1.29 (t, *J* = 7.4 Hz, 3H, CH<sub>3</sub>) ppm. **<sup>13</sup>C NMR** (101 MHz, CD<sub>2</sub>Cl<sub>2</sub>):  $\delta$  161.71, 161.23, 160.53, 159.64, 145.68, 143.88, 143.16, 142.98, 141.19, 138.14, 137.29, 131.17, 117.05, 115.75, 114.32, 110.92, 108.06, 106.54, 105.61, 105.28, 56.41, 56.29, 56.21, 20.91, 11.38 ppm. **<sup>19</sup>F NMR** (282 MHz, CD<sub>2</sub>Cl<sub>2</sub>):  $\delta$  -(116.44-117.20) (m, 1F, BF<sub>2</sub>), -(120.77-121.47) (m, 1F, BF<sub>2</sub>), -(152.48-152.51) (m, 20%), -152.55 (s, 80%) (4F, BF<sub>4</sub>) ppm. **HRMS (ESI)** calculated for [C<sub>32</sub>H<sub>29</sub>BF<sub>2</sub>N<sub>3</sub>O<sub>3</sub> (M<sup>+</sup>)]: 552.2265 m/z; found: 552.2286 m/z.



**7-Allyl-6,6-difluoro-1,15-dimethoxy-11-propyl-6,11-dihydro-15bH-6 $\lambda^4$ ,7 $\lambda^4$ -**

**[1,3,2]diazaborinino[5,4,3-de]quinolino[4,3,2-mn]acridin-15b-ylum tetrafluoroborate**

**(4aJ)**

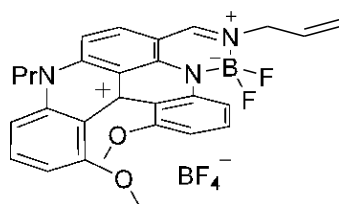

Prepared according to the general procedure, using 50 mg (0.10 mmol) of quinacridinium salt **6a**, 9  $\mu$ L (0.11 mmol) of allylamine and 0.8  $\mu$ L (0.01 mmol) of pyrrolidine in 2 mL of CH<sub>3</sub>CN, and 100  $\mu$ L of DIPEA (0.57 mmol) and 191  $\mu$ L (0.72 mmol) of BF<sub>3</sub>·OEt<sub>2</sub> (48 wt%) in 2 mL of dry and degassed CH<sub>2</sub>Cl<sub>2</sub>. The desired compound was isolated as a dark red solid (22 mg, 0.04 mmol, 38%).

**R<sub>f</sub>** (basic Al<sub>2</sub>O<sub>3</sub>, CH<sub>2</sub>Cl<sub>2</sub>/MeOH, 97:3): 0.26. **UV/Vis** (CH<sub>3</sub>CN, C = 10<sup>-5</sup> M,  $\lambda_{\text{abs}}$  ( $\epsilon$ )): 554 nm (13200 L·mol<sup>-1</sup>·cm<sup>-1</sup>). **IR (neat)**:  $\bar{\nu}$  1650, 1587, 1559, 1510, 1459, 1375, 1334, 1277, 1259, 1250, 1172, 1025, 1005, 926, 822, 782, 753, 678, 651, 634, 531 cm<sup>-1</sup>. **<sup>1</sup>H NMR** (400 MHz, CD<sub>2</sub>Cl<sub>2</sub>):  $\delta$  8.83 (brs, 1H, CH), 8.49 (d, *J* = 9.0 Hz, 1H, CH), 8.32 (dt, *J* = 9.2, 3.2 Hz, 1H, CH), 7.97 (dt, *J* = 20.0, 8.6 Hz, 2H, 2 x CH), 7.55-7.44 (m, 2H, 2 x CH), 6.99 (dd, *J* = 8.1, 6.1 Hz, 2H, 2 x CH), 6.16 (ddt, *J* = 16.8, 9.9, 6.6 Hz, 1H, CH), 5.56 (dd, *J* = 27.6, 13.6 Hz, 2H, 2 x CH), 4.74-4.65 (m, 1H, CH<sub>2</sub>), 4.62 (d, *J* = 6.6 Hz, 2H, CH<sub>2</sub>), 4.58-4.47 (m, 1H, CH<sub>2</sub>), 3.77 (d, *J* = 2.3 Hz, 6H, 2 x OCH<sub>3</sub>), 2.26-2.10 (m, 2H, CH<sub>2</sub>), 1.27 (t, *J* = 7.4 Hz, 3H, CH<sub>3</sub>) ppm. **<sup>13</sup>C NMR** (101 MHz, CD<sub>2</sub>Cl<sub>2</sub>):  $\delta$  162.77, 160.51, 159.63, 145.07, 143.17, 142.99, 142.40, 141.32, 140.00, 137.98, 137.11, 132.14, 122.71, 117.22, 115.15, 114.14, 114.00, 113.97, 107.92, 105.76, 105.24, 104.94, 56.34, 56.16, 55.37, 52.73, 20.75, 11.37 ppm. **<sup>19</sup>F NMR** (282 MHz, CD<sub>2</sub>Cl<sub>2</sub>):  $\delta$  -(123.28-124.03) (m, 1F, BF<sub>2</sub>), -(126.38-127.11) (m, 1F, BF<sub>2</sub>), -152.28 (brs, 20%), -(152.32-152.34) (m, 80%) (4F, BF<sub>4</sub>) ppm. **HRMS (ESI)** calculated for [C<sub>28</sub>H<sub>27</sub>BF<sub>2</sub>N<sub>3</sub>O<sub>2</sub> (M<sup>+</sup>)]: 486.2159 m/z; found: 486.2177 m/z.

**(S)-7-(3,3-Dimethylbutan-2-yl)-6,6-difluoro-1,15-dimethoxy-11-propyl-6,11-dihydro-15bH-6 $\lambda^4$ ,7 $\lambda^4$ -[1,3,2]diazaborinino[5,4,3-de]quinolino[4,3,2-mn]acridin-15b-ylum tetrafluoroborate (4aK)**

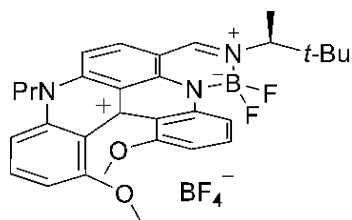

Prepared according to the general procedure, using 50 mg (0.10 mmol) of quinacridinium salt **6a**, 15  $\mu$ L (0.11 mmol) of (*S*)-(+)-3,3-dimethyl-2-butylamine and 0.8  $\mu$ L (0.01 mmol) of pyrrolidine in 2 mL of CH<sub>3</sub>CN, and 100  $\mu$ L of DIPEA (0.57 mmol) and 191  $\mu$ L (0.72 mmol) of BF<sub>3</sub>·OEt<sub>2</sub> (48 wt%) in 2 mL of dry and degassed CH<sub>2</sub>Cl<sub>2</sub>. The desired compound was isolated as a dark red solid (19 mg, 0.03 mmol, 30%).

**R<sub>f</sub>** (basic Al<sub>2</sub>O<sub>3</sub>, CH<sub>2</sub>Cl<sub>2</sub>/MeOH, 97:3): 0.40. **UV/Vis** (CH<sub>3</sub>CN, C = 10<sup>-5</sup> M,  $\lambda_{\text{abs}}$  ( $\epsilon$ )): 561 nm (13500 L·mol<sup>-1</sup>·cm<sup>-1</sup>). **IR (neat)**:  $\bar{\nu}$  2962, 1644, 1597, 1583, 1557, 1510, 1453, 1374, 1330, 1274, 1258, 1170, 1051, 1023, 1006, 822, 781, 752, 651 cm<sup>-1</sup>. **<sup>1</sup>H NMR** (400 MHz, CD<sub>2</sub>Cl<sub>2</sub>):  $\delta$  8.87 (brs, 1H, CH), 8.54 (dd, *J* = 9.0, 3.5 Hz, 1H, CH), 8.34 (ddd, *J* = 13.2, 9.2, 3.0 Hz, 1H, CH), 8.00 (td, *J* = 8.5, 2.3 Hz, 1H, CH), 7.93 (t, *J* = 8.5 Hz, 1H, CH), 7.57-7.47 (m, 2H, 2  $\times$  CH), 6.99 (td, *J* = 9.5, 8.8, 2.5 Hz, 1H, CH), 4.76-4.64 (m, 1H, CH<sub>2</sub>), 4.61-4.49 (m, 1H, CH<sub>2</sub>), 4.28-4.18 (m, 1H, CH), 3.81-3.74 (m, 6H, 2  $\times$  OCH<sub>3</sub>), 2.25-2.11 (m, 2H, CH<sub>2</sub>), 1.62 (dd, *J* = 10.2, 7.1 Hz, 3H, CH<sub>3</sub>), 1.27 (t, *J* = 7.4 Hz, 3H, CH<sub>3</sub>), 1.13 (d, *J* = 24.3 Hz, 9H, 3  $\times$  CH<sub>3</sub>) ppm. **<sup>13</sup>C NMR** (101 MHz, CD<sub>2</sub>Cl<sub>2</sub>):  $\delta$  161.58, 161.49, 160.50, 160.47, 159.71, 159.43, 144.98, 144.94, 143.40, 143.08, 142.80, 142.60, 142.48, 141.33, 141.31, 139.69, 137.99, 137.94, 137.02, 136.98, 117.19, 114.18, 114.09, 113.98, 113.91, 107.94, 107.93, 105.85, 105.59, 105.23, 105.20, 105.01, 104.78, 56.35, 56.32, 56.17, 56.14, 52.65, 36.33, 27.89, 27.60, 20.75, 18.25, 20.72, 18.03, 11.34 ppm. **<sup>19</sup>F NMR** (282 MHz, CD<sub>2</sub>Cl<sub>2</sub>):  $\delta$  -(119.98-120.76) (m, 1F, BF<sub>2</sub>), -(122.54-123.34) (m, 50%), -(126.36-127.10) (m, 50%) (1F, BF<sub>2</sub>), -152.24 (brs, 20%), -(152.28-152.30) (m, 80%) (4F, BF<sub>4</sub>) ppm. **HRMS (ESI)** calculated for [C<sub>31</sub>H<sub>35</sub>BF<sub>2</sub>N<sub>3</sub>O<sub>2</sub> (M<sup>+</sup>)]: 530.2785 m/z; found: 530.2785 m/z.

**7-(2-(Dimethylamino)ethyl)-6,6-difluoro-1,15-dimethoxy-11-propyl-6,11-dihydro-15bH-6 $\lambda^4$ ,7 $\lambda^4$ -[1,3,2]diazaborinino[5,4,3-de]quinolino[4,3,2-mn]acridin-15b-ylum hexafluorophosphate (4aL)**

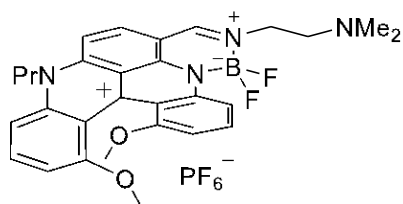

Prepared according to the general procedure, using 49 mg (0.10 mmol) of quinacridinium salt **6a**, 12  $\mu$ L (0.11 mmol) of *N,N*-dimethylethylenediamine and 0.8  $\mu$ L (0.01 mmol) of pyrrolidine in 2 mL of CH<sub>3</sub>CN, and 98  $\mu$ L of DIPEA (0.56 mmol) and 188  $\mu$ L (0.71 mmol) of BF<sub>3</sub>·OEt<sub>2</sub> (48 wt%) in 2 mL of dry and degassed CH<sub>2</sub>Cl<sub>2</sub>. Ion metathesis with a solution of KPF<sub>6</sub> 0.2 M was done before flash chromatography. The desired compound was isolated as a dark red solid (67 mg, 0.07 mmol, 73%).

**R<sub>f</sub>** (basic Al<sub>2</sub>O<sub>3</sub>, CH<sub>2</sub>Cl<sub>2</sub>/MeOH, 97:3): 0.41. **UV/Vis** (CH<sub>3</sub>CN, C = 10<sup>-5</sup> M,  $\lambda_{\text{abs}}$  ( $\epsilon$ )): 553 nm (11600 L·mol<sup>-1</sup>·cm<sup>-1</sup>). **IR (neat)**:  $\bar{\nu}$  1649, 1598, 1560, 1511, 1458, 1376, 1352, 1332, 1258, 1171, 1111, 1094, 1050, 1023, 1009, 831, 781, 753, 657, 555 cm<sup>-1</sup>. **<sup>1</sup>H NMR** (400 MHz, CD<sub>2</sub>Cl<sub>2</sub>):  $\delta$  8.71 (brs, 1H, CH), 8.39 (d, *J* = 9.0 Hz, 1H, CH), 8.30 (dt, *J* = 9.1, 3.1 Hz, 1H, CH), 8.00 (dd, *J* = 8.9, 8.1 Hz, 1H, CH), 7.94 (dd, *J* = 9.1, 7.9 Hz, 1H, CH), 7.48 (dd, *J* = 10.6, 8.8 Hz, 2H, 2  $\times$  CH), 6.99 (t, *J* = 8.0 Hz, 2H, 2  $\times$  CH), 4.75-4.64 (m, 1H, CH<sub>2</sub>), 4.58-4.45 (m, 1H, CH<sub>2</sub>), 4.01 (brs, 2H, CH<sub>2</sub>), 3.77 (d, *J* = 2.3 Hz, 6H, 2  $\times$  OCH<sub>3</sub>), 2.87 (td, *J* = 6.0, 1.4 Hz, 2H, CH<sub>2</sub>), 2.37 (s, 6H, 2  $\times$  CH<sub>3</sub>), 2.31-2.05 (m, 2H, CH<sub>2</sub>), 1.27 (t, *J* = 7.4 Hz, 3H, CH<sub>3</sub>) ppm. **<sup>13</sup>C NMR** (101 MHz, CD<sub>2</sub>Cl<sub>2</sub>):  $\delta$  163.40, 160.50, 159.64, 144.92, 143.15, 143.03, 142.12, 141.32, 139.95, 138.03, 137.11, 117.26, 115.10, 114.12, 113.99, 113.92, 113.82, 107.88, 105.52, 105.23, 104.90, 58.93, 56.34, 56.15, 52.66, 50.29, 45.54, 30.26, 20.72, 11.35 ppm. **<sup>19</sup>F NMR** (282 MHz, CD<sub>2</sub>Cl<sub>2</sub>):  $\delta$  -71.73 (s), -74.25 (s) (6F, PF<sub>6</sub>), - (123.00-123.80) (m, 1F, BF<sub>2</sub>), -(126.52-127.29) (m, 1F, BF<sub>2</sub>) ppm. **HRMS (ESI)** calculated for [C<sub>29</sub>H<sub>32</sub>BF<sub>2</sub>N<sub>4</sub>O<sub>2</sub> (M<sup>+</sup>)]: 517.2581 m/z; found: 517.2576 m/z.

**6,6-Difluoro-7-(2-hydroxyethyl)-1,15-dimethoxy-11-propyl-6,11-dihydro-15bH-6 $\lambda^4$ ,7 $\lambda^4$ -[1,3,2]diazaborinino[5,4,3-de]quinolino[4,3,2-mn]acridin-15b-ylium hexafluorophosphate (4aM)**

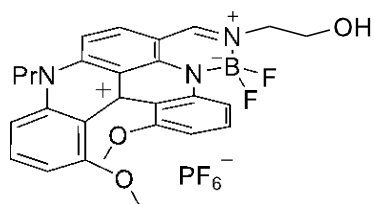

Prepared according to the general procedure, using 51 mg (0.10 mmol) of quinacridinium salt **6a**, 9  $\mu$ L (0.11 mmol) of 2-aminoethanol and 0.9  $\mu$ L (0.01 mmol) of pyrrolidine in 2 mL of CH<sub>3</sub>CN, and 101  $\mu$ L of DIPEA (0.57 mmol) and 193  $\mu$ L (0.73 mmol) of BF<sub>3</sub>·OEt<sub>2</sub> (48 wt%) in 2 mL of dry and degassed CH<sub>2</sub>Cl<sub>2</sub>. Ion metathesis with a solution of KPF<sub>6</sub> 0.2 M was done before flash chromatography. The desired compound was isolated as a dark red solid (43 mg, 0.07 mmol, 65%).

**R<sub>f</sub>** (basic Al<sub>2</sub>O<sub>3</sub>, CH<sub>2</sub>Cl<sub>2</sub>/MeOH, 97:3): 0.20. **UV/Vis** (CH<sub>3</sub>CN, C = 10<sup>-5</sup> M,  $\lambda_{\text{abs}}$  ( $\epsilon$ )): 560 nm (17200 L·mol<sup>-1</sup>·cm<sup>-1</sup>). **IR (neat)**:  $\bar{\nu}$  3605, 2924, 1643, 1597, 1559, 1510, 1457, 1374, 1331, 1259, 1242, 1172, 1083, 1051, 1023, 1007, 828, 820, 780, 753, 733, 656, 618, 555 cm<sup>-1</sup>. **<sup>1</sup>H NMR** (400 MHz, CD<sub>2</sub>Cl<sub>2</sub>):  $\delta$  8.81 (brs, 1H, CH), 8.39 (d, *J* = 9.0 Hz, 1H, CH), 8.36-8.28 (m, 1H, CH), 7.97 (dt, *J* = 16.9, 8.5 Hz, 2H, 2 x CH), 7.46 (dd, *J* = 18.1, 9.0 Hz, 2H, 2 x CH), 6.99 (dd, *J* = 8.1, 5.4 Hz, 2H, 2 x CH), 4.74-4.65 (m, 1H, CH<sub>2</sub>), 4.57-4.45 (m, 1H, CH<sub>2</sub>), 4.17-4.08 (m, 4H, 2 x CH<sub>2</sub>), 3.77 (d, *J* = 3.2 Hz, 6H, 2 x OCH<sub>3</sub>), 2.24-2.14 (m, 2H, CH<sub>2</sub>), 0.88 (t, *J* = 6.6 Hz, 3H, CH<sub>3</sub>) ppm. **<sup>13</sup>C NMR** (101 MHz, CD<sub>2</sub>Cl<sub>2</sub>):  $\delta$  142.19, 142.17, 138.02, 137.23, 128.20, 107.86, 105.52, 105.26, 104.98, 61.50, 56.36, 56.16, 55.80, 32.50, 30.26, 29.93, 23.27, 14.45, 11.40 ppm. **<sup>19</sup>F NMR** (282 MHz, CD<sub>2</sub>Cl<sub>2</sub>):  $\delta$  -71.70 (s), -74.21 (s) (6F, PF<sub>6</sub>), -(122.83-123.61) (m, 1F, BF<sub>2</sub>), -(126.27-127.03) (m, 1F, BF<sub>2</sub>) ppm. **HRMS (ESI)** calculated for [C<sub>27</sub>H<sub>27</sub>BF<sub>2</sub>N<sub>3</sub>O<sub>3</sub> (M<sup>+</sup>)]: 490.2108 m/z; found: 490.2122 m/z.

**6,6-Difluoro-1,7,15-trimethoxy-11-propyl-6,11-dihydro-15bH-6 $\lambda^4$ ,7 $\lambda^4$ -**

**[1,3,2]diazaborinino[5,4,3-de]quinolino[4,3,2-mn]acridin-15b-ylum      tetrafluoroborate**

**(4aN)**

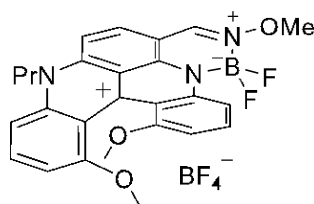

Prepared according to the general procedure, using 51 mg (0.10 mmol) of quinacridinium salt **6a**, 9.8 mg (0.11 mmol) of methoxyammonium chloride, 16  $\mu$ L (0.11 mmol) of Et<sub>3</sub>N (stirring for 10 min) and 0.9  $\mu$ L (0.01 mmol) of pyrrolidine in 2 mL of CH<sub>3</sub>CN, and 101  $\mu$ L of DIPEA (0.57 mmol) and 192  $\mu$ L (0.73 mmol) of BF<sub>3</sub>·OEt<sub>2</sub> (48 wt%) in 2 mL of dry and degassed CH<sub>2</sub>Cl<sub>2</sub>. The desired compound was isolated as a dark red solid (43 mg, 0.08 mmol, 74%).

**R<sub>f</sub>** (basic Al<sub>2</sub>O<sub>3</sub>, CH<sub>2</sub>Cl<sub>2</sub>/MeOH, 97:3): 0.34. **UV/Vis** (CH<sub>3</sub>CN, C = 10<sup>-5</sup> M,  $\lambda_{\text{abs}}$  ( $\epsilon$ )): 556 nm (10600 L·mol<sup>-1</sup>·cm<sup>-1</sup>). **IR (neat)**:  $\bar{\nu}$  1596, 1554, 1510, 1495, 1468, 1427, 1371, 1327, 1264, 1238, 1169, 1126, 1048, 1022, 946, 852, 822, 780, 750, 656, 590 cm<sup>-1</sup>. **<sup>1</sup>H NMR** (400 MHz, CD<sub>2</sub>Cl<sub>2</sub>):  $\delta$  9.24 (brs, 1H, CH), 8.56 (d, *J* = 9.1 Hz, 1H, CH), 8.29 (dt, *J* = 9.1, 3.3 Hz, 1H, CH), 7.99 (ddd, *J* = 17.2, 8.9, 8.0 Hz, 2H, 2 x CH), 7.55 (d, *J* = 9.1 Hz, 1H, CH), 7.51 (d, *J* = 8.8 Hz, 1H, CH), 7.00 (dd, *J* = 8.0, 3.2 Hz, 2H, 2 x CH), 4.76-4.66 (m, 1H, CH<sub>2</sub>), 4.60-4.49 (m, 1H, CH<sub>2</sub>), 4.34 (s, 3H, OCH<sub>3</sub>), 3.77 (d, *J* = 3.2 Hz, 6H, 2 x OCH<sub>3</sub>), 2.27-2.12 (m, 2H, CH<sub>2</sub>), 1.28 (t, *J* = 7.4 Hz, 3H, CH<sub>3</sub>) ppm. **<sup>13</sup>C NMR** (101 MHz, CD<sub>2</sub>Cl<sub>2</sub>):  $\delta$  160.50, 159.68, 156.57, 144.92, 143.15, 142.11, 141.28, 139.42, 138.14, 137.32, 115.05, 114.21, 107.92, 106.34, 105.26, 105.11, 103.30, 67.01, 56.37, 56.19, 52.88, 20.79, 11.38 ppm. **<sup>19</sup>F NMR** (282 MHz, CD<sub>2</sub>Cl<sub>2</sub>):  $\delta$  -(124.74-125.45) (m, 1F, BF<sub>2</sub>), -(128.02-128.70) (m, 1F, BF<sub>2</sub>), -152.02 (s, 20%), -(152.06-152.08) (m, 80%) (4F, BF<sub>4</sub>) ppm. **HRMS (ESI)** calculated for [C<sub>26</sub>H<sub>25</sub>BF<sub>2</sub>N<sub>3</sub>O<sub>3</sub> (M<sup>+</sup>)]: 476.1952 m/z; found: 476.1953 m/z.

**<sup>1</sup>H NMR**  
400 MHz  
CD<sub>2</sub>Cl<sub>2</sub>

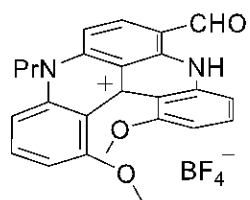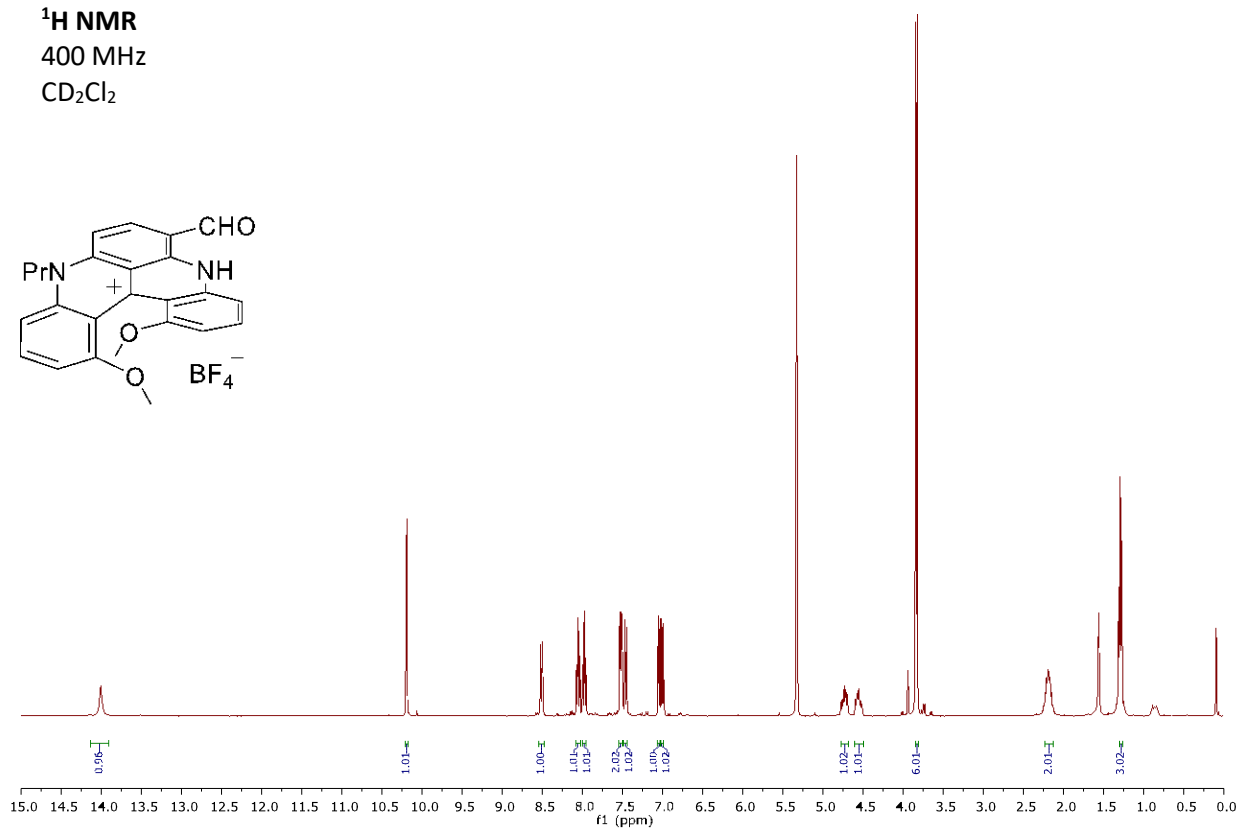

**<sup>13</sup>C NMR**  
101 MHz  
CD<sub>2</sub>Cl<sub>2</sub>

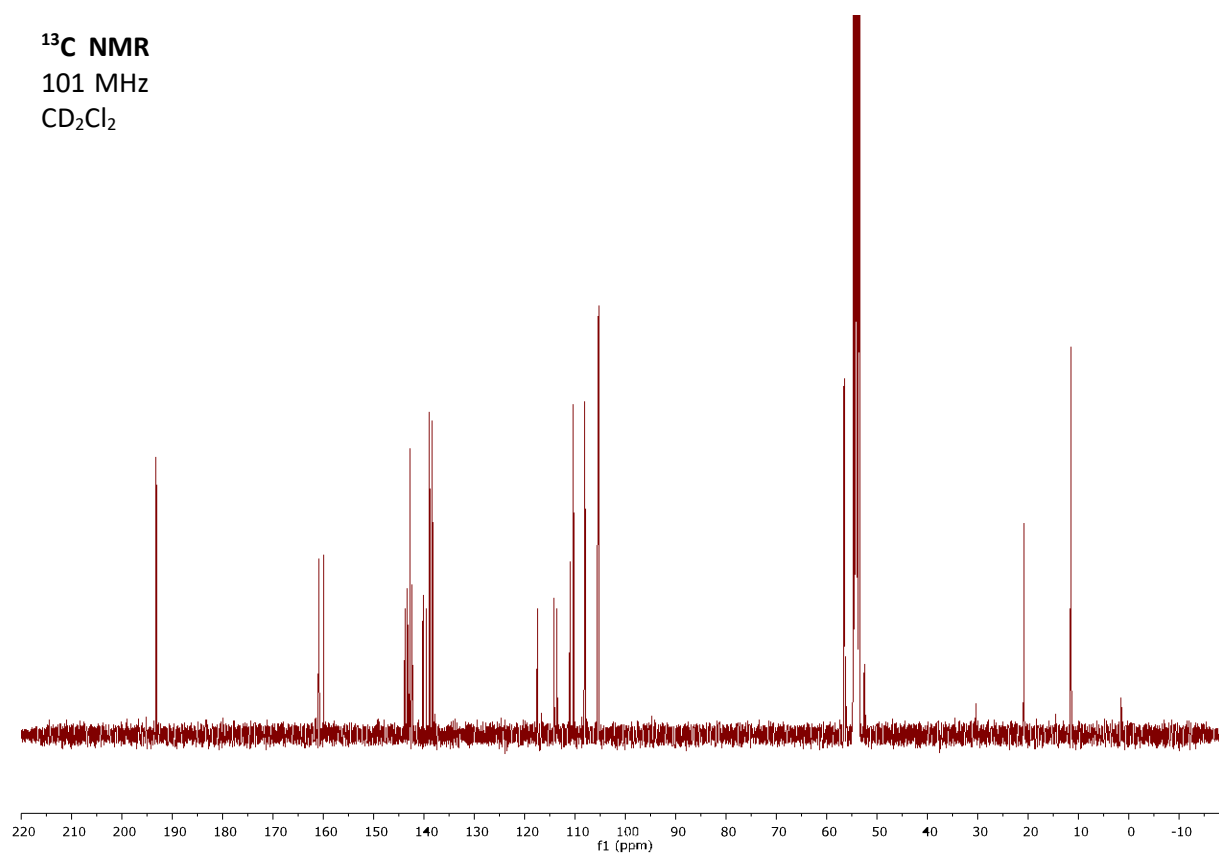



**<sup>19</sup>F NMR**  
282 MHz  
CD<sub>2</sub>Cl<sub>2</sub>

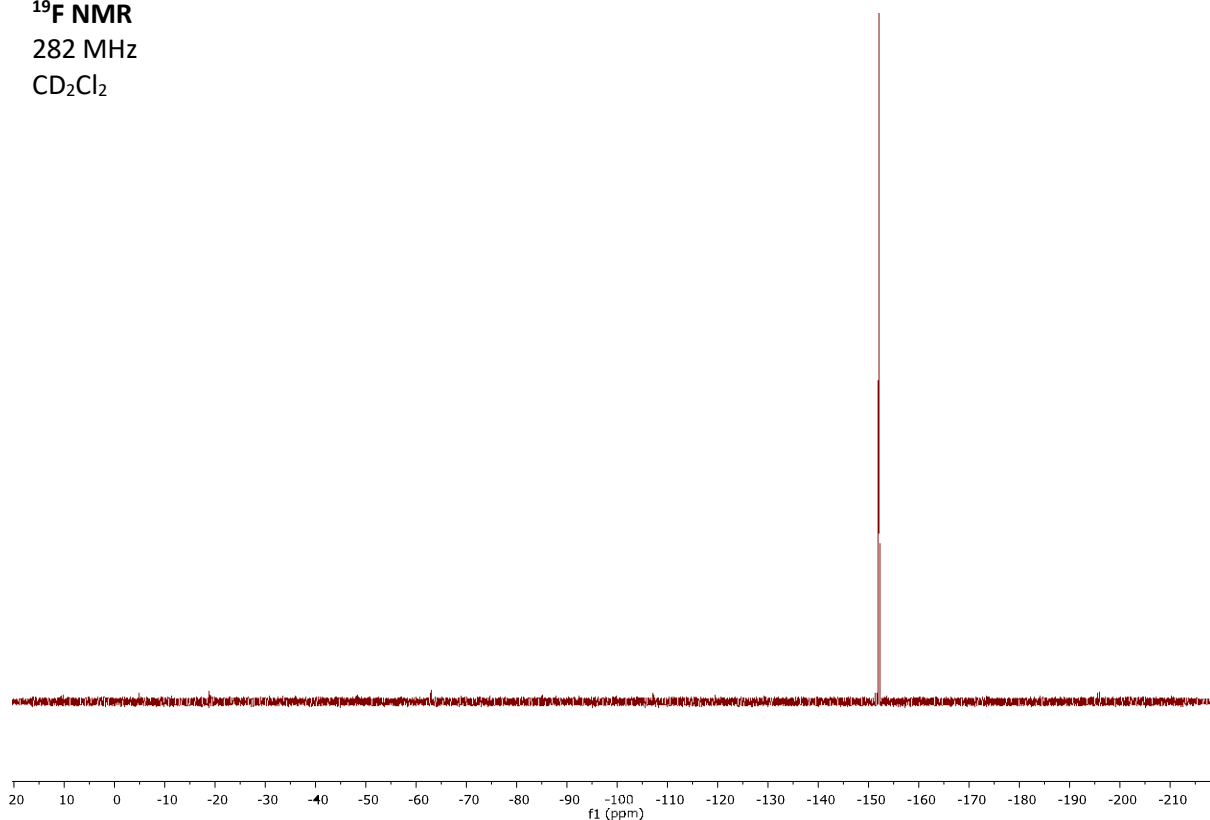

**<sup>1</sup>H NMR**  
500 MHz  
CD<sub>2</sub>Cl<sub>2</sub>

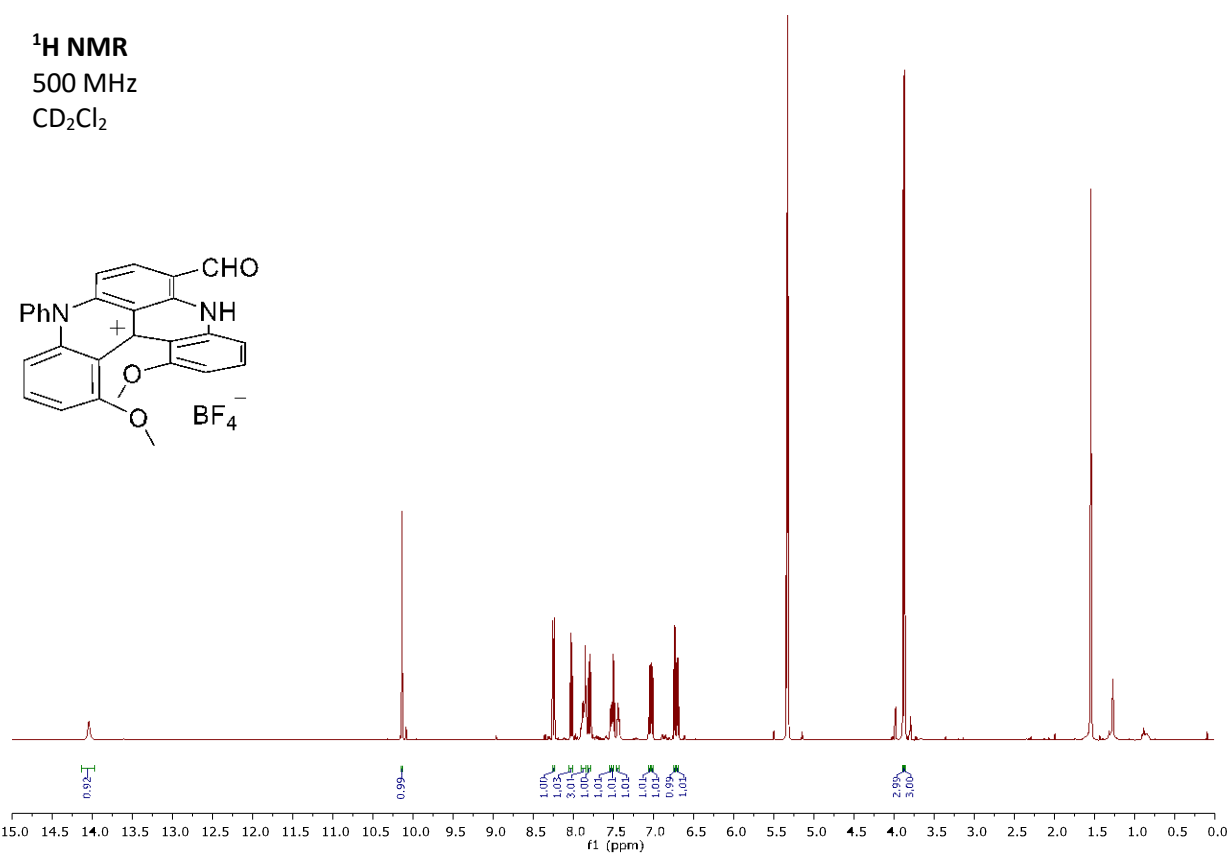

**$^{13}\text{C}$  NMR**  
126 MHz  
 $\text{CD}_2\text{Cl}_2$

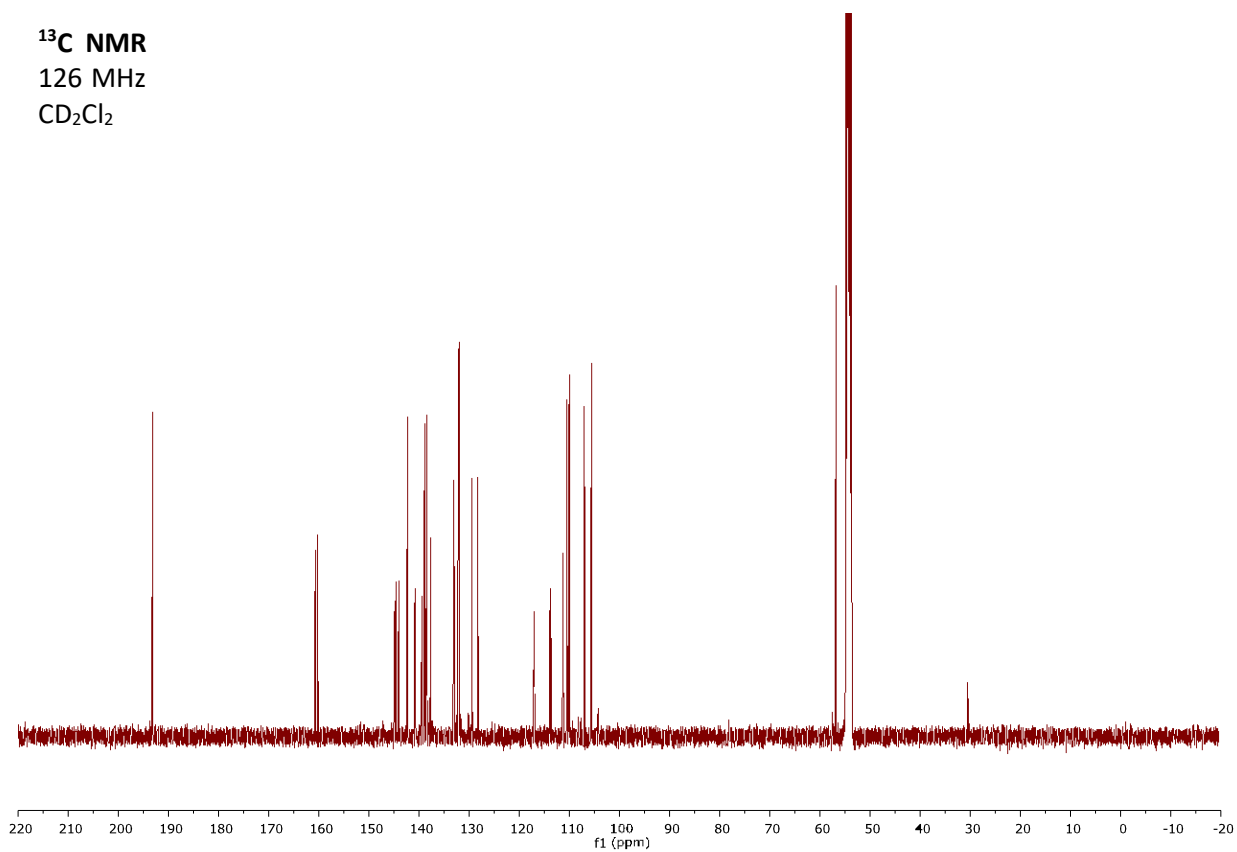

**$^{19}\text{F}$  NMR**  
282 MHz  
 $\text{CD}_2\text{Cl}_2$

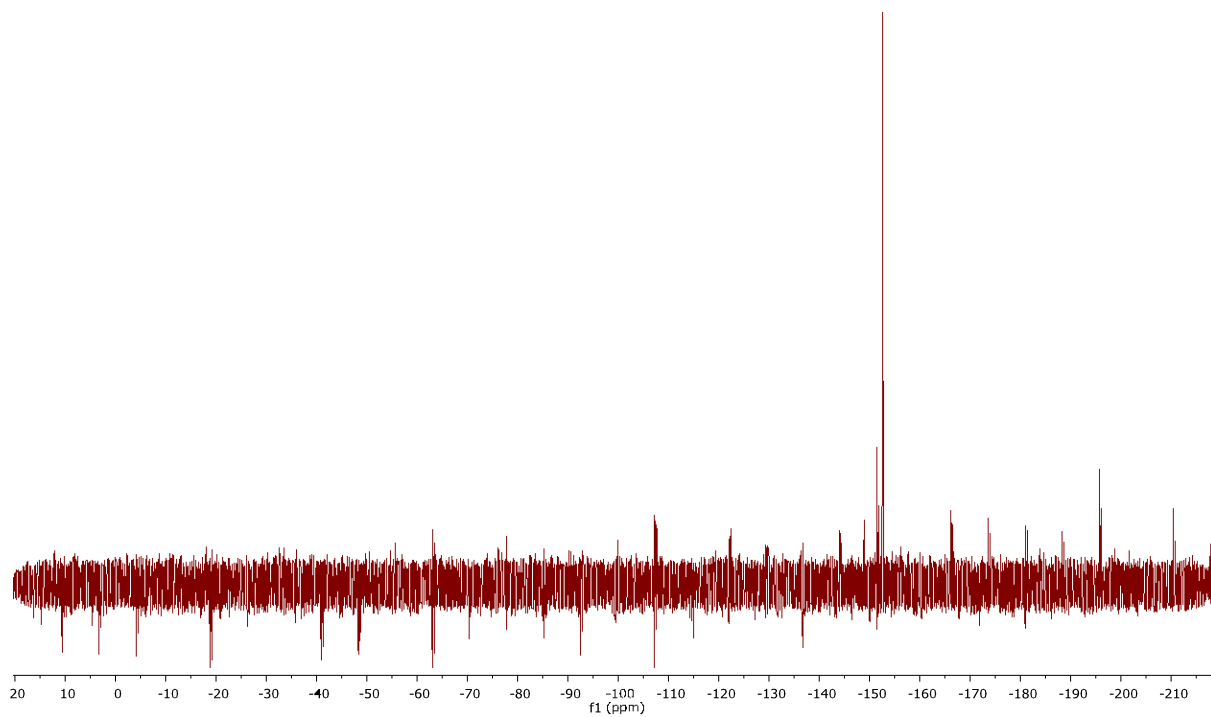

**<sup>1</sup>H NMR**  
400 MHz  
CD<sub>2</sub>Cl<sub>2</sub>

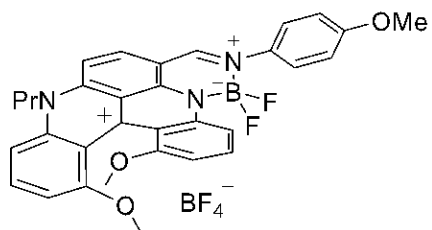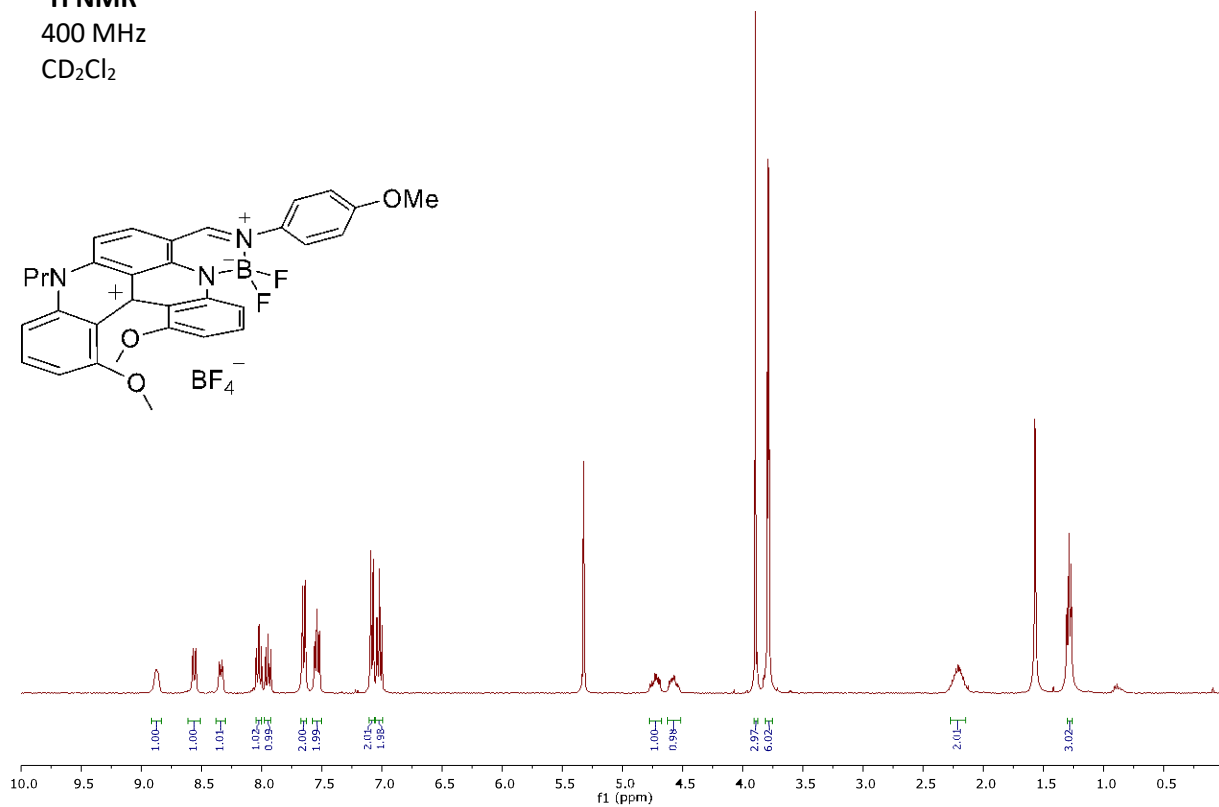

**<sup>13</sup>C NMR**  
101 MHz  
CD<sub>2</sub>Cl<sub>2</sub>

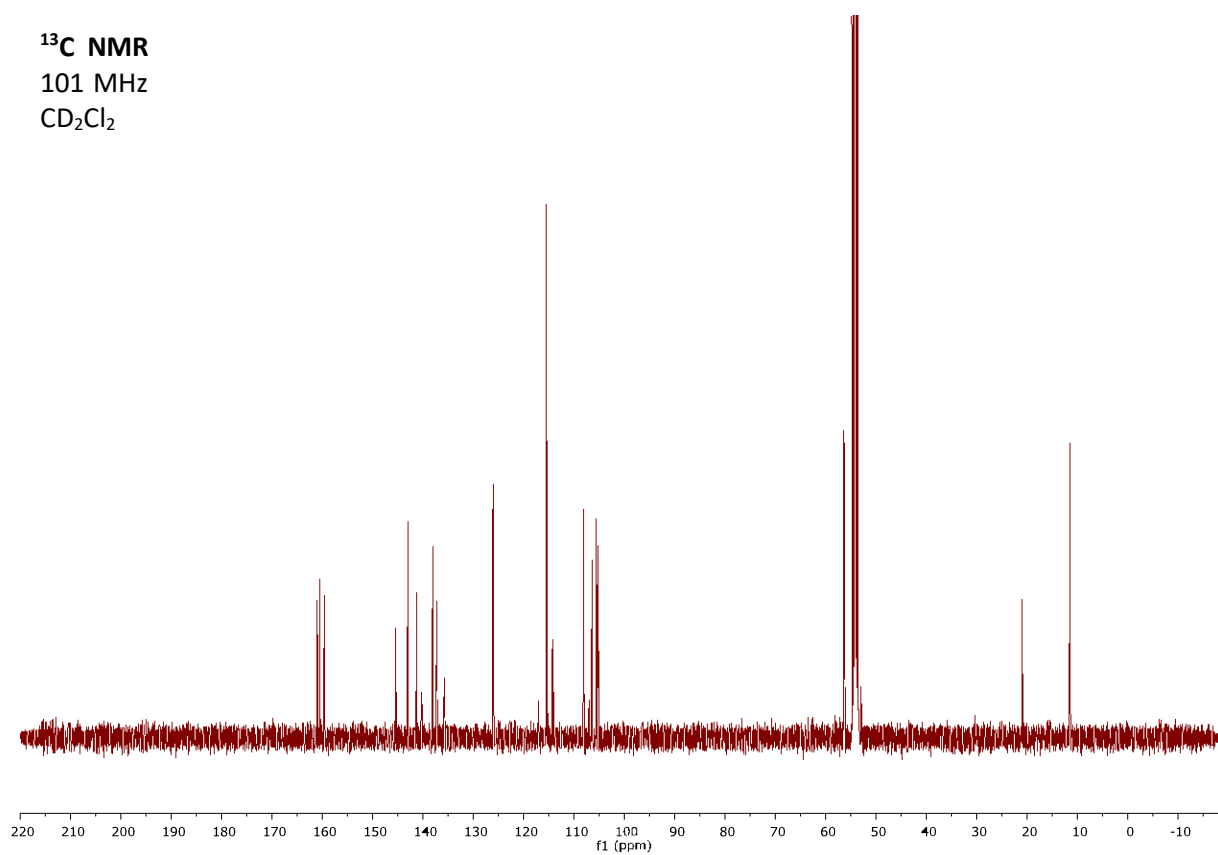

**<sup>19</sup>F NMR**  
282 MHz  
CD<sub>2</sub>Cl<sub>2</sub>

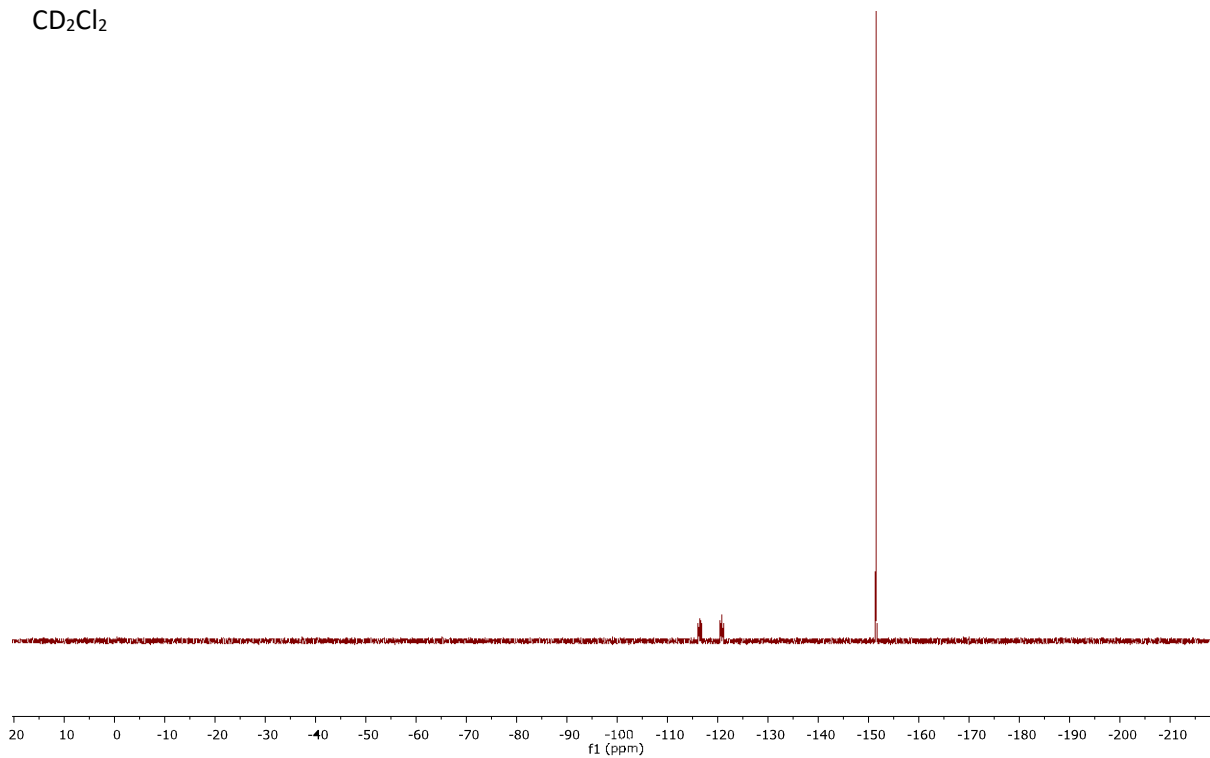

**<sup>1</sup>H NMR**  
400 MHz  
CD<sub>2</sub>Cl<sub>2</sub>

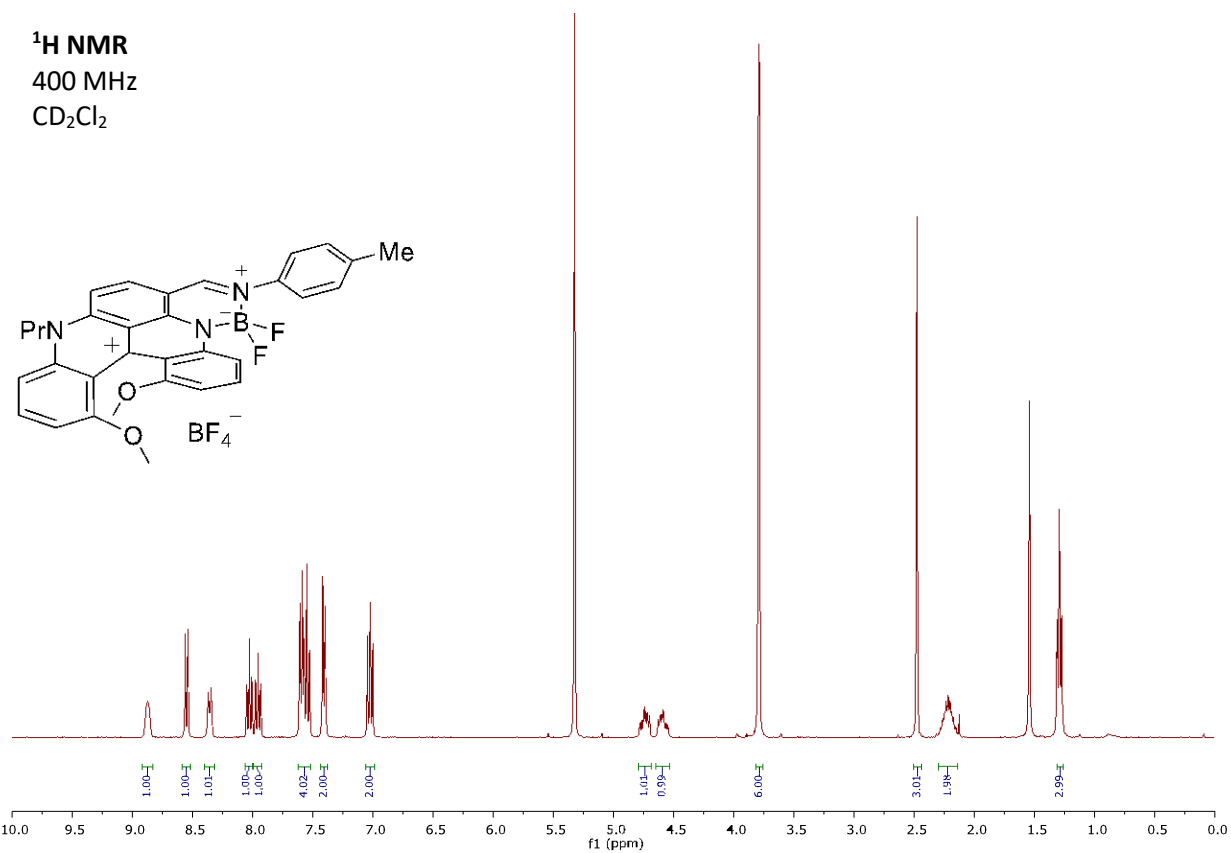

**$^{13}\text{C}$  NMR**  
101 MHz  
 $\text{CD}_2\text{Cl}_2$

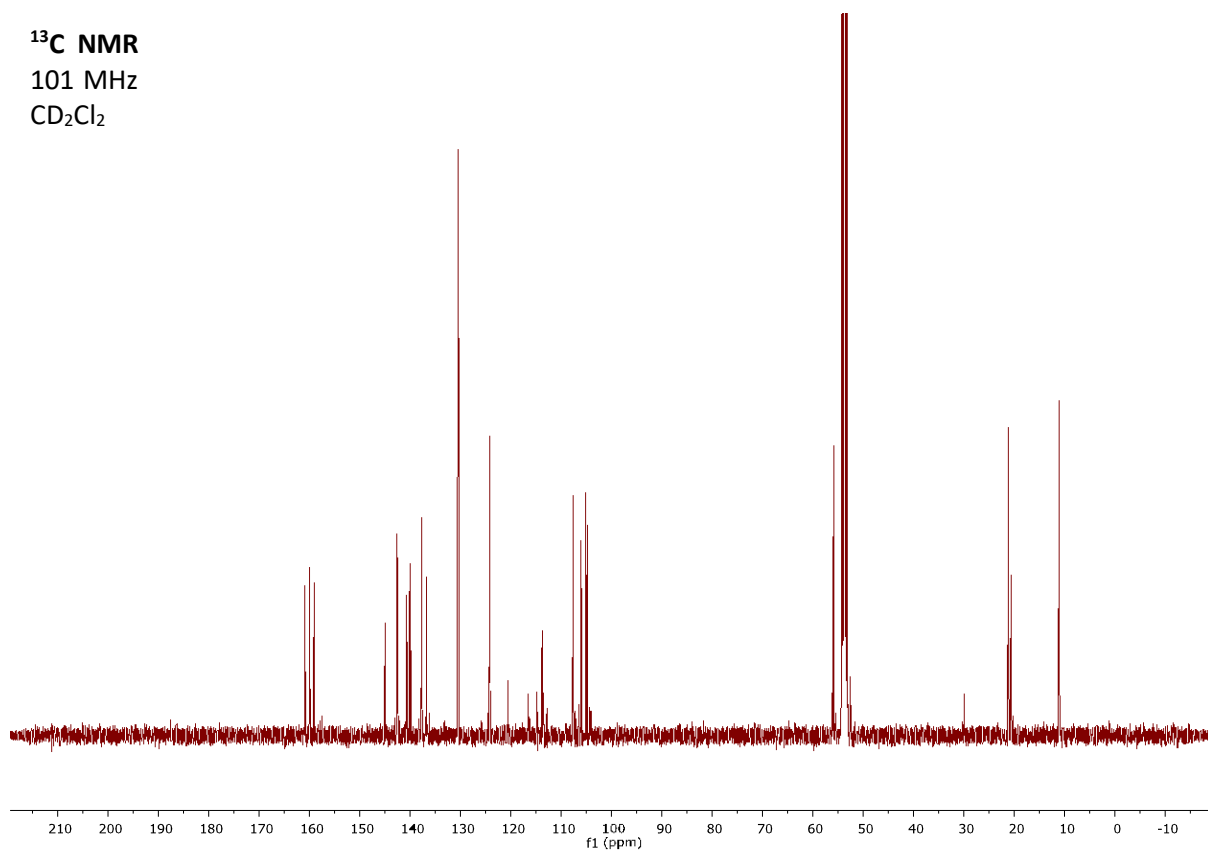

**$^{19}\text{F}$  NMR**  
282 MHz  
 $\text{CD}_2\text{Cl}_2$

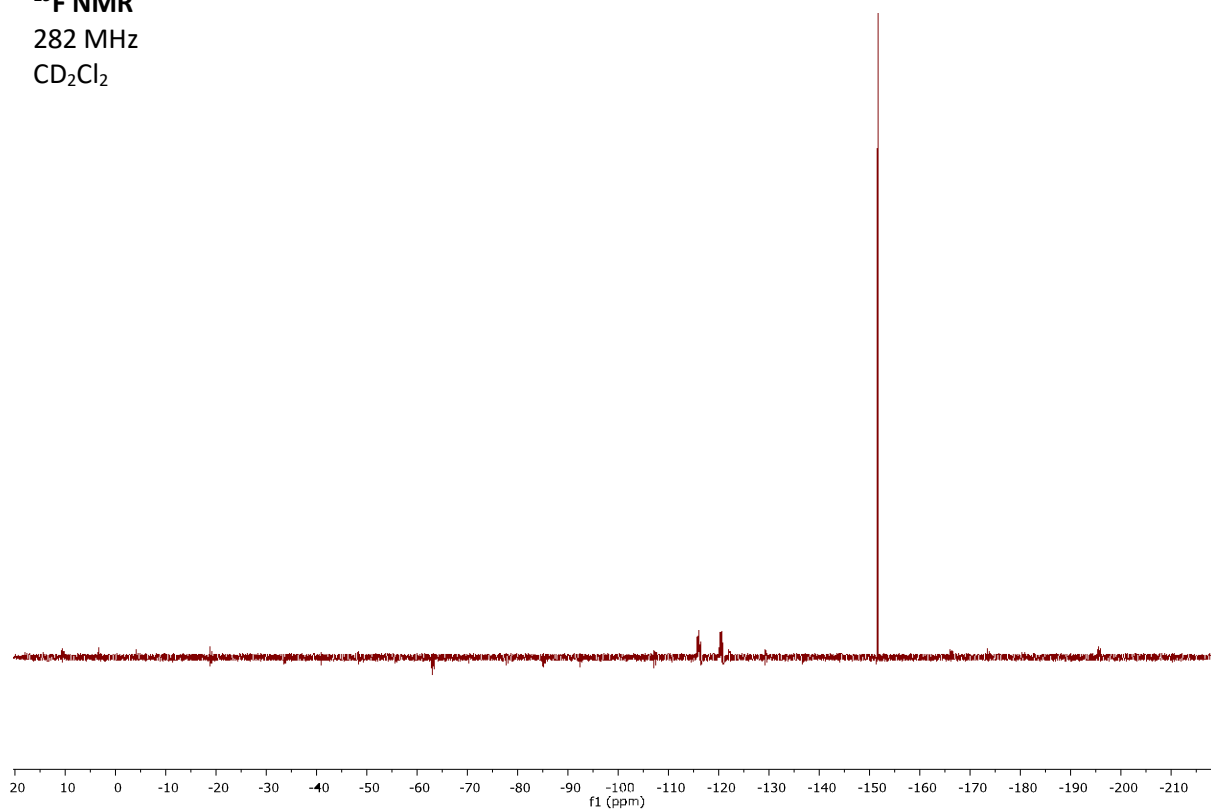

**<sup>1</sup>H NMR**  
400 MHz  
CD<sub>2</sub>Cl<sub>2</sub>

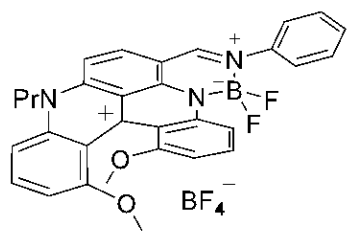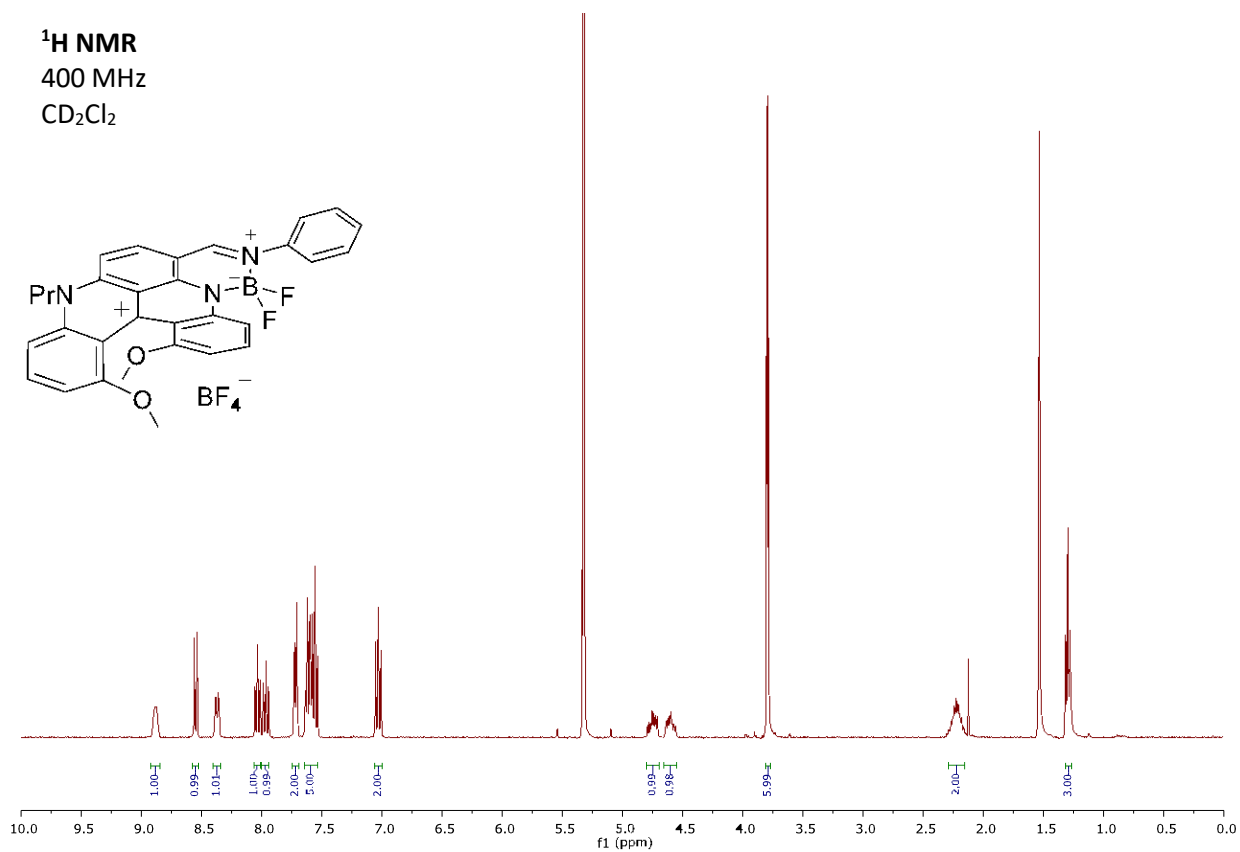

**<sup>13</sup>C NMR**  
126 MHz  
CD<sub>2</sub>Cl<sub>2</sub>

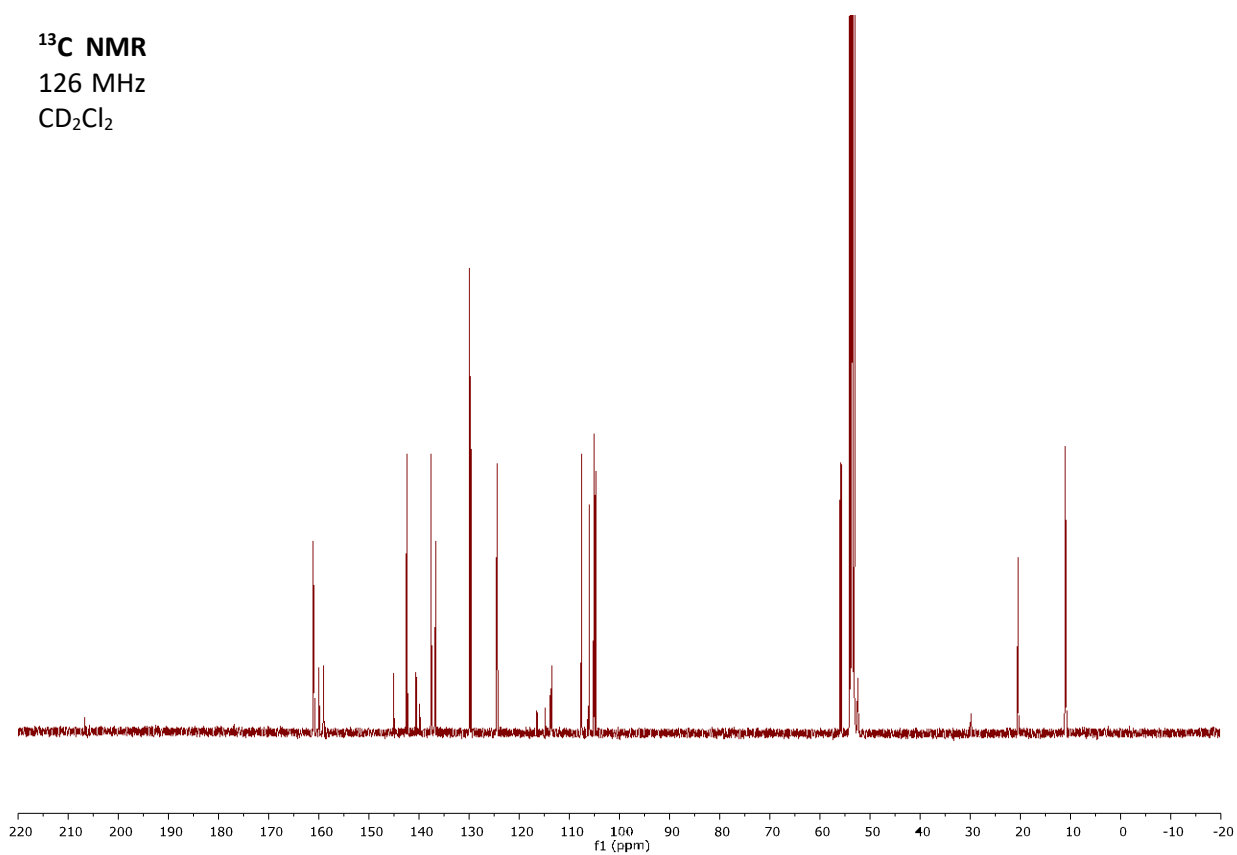

**<sup>19</sup>F NMR**  
282 MHz  
CD<sub>2</sub>Cl<sub>2</sub>

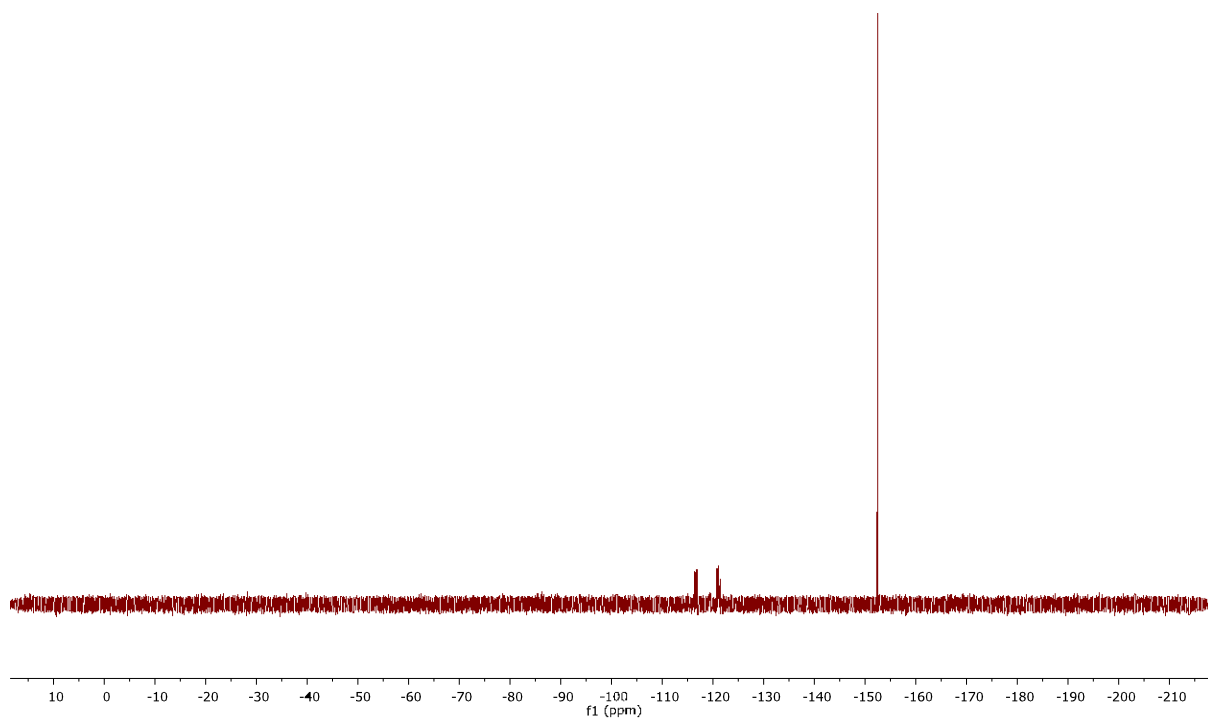

**<sup>1</sup>H NMR**  
400 MHz  
CD<sub>2</sub>Cl<sub>2</sub>

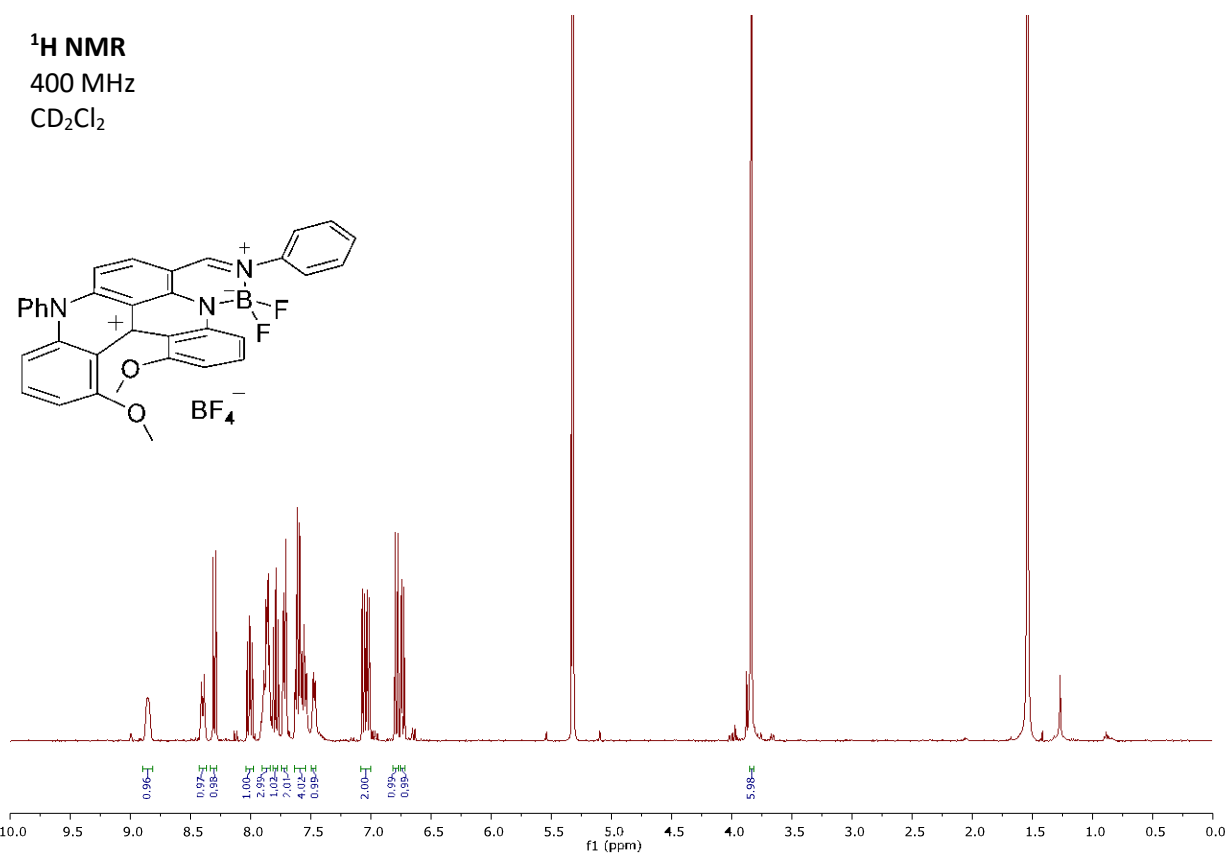

**$^{13}\text{C}$  NMR**  
126 MHz  
 $\text{CD}_2\text{Cl}_2$

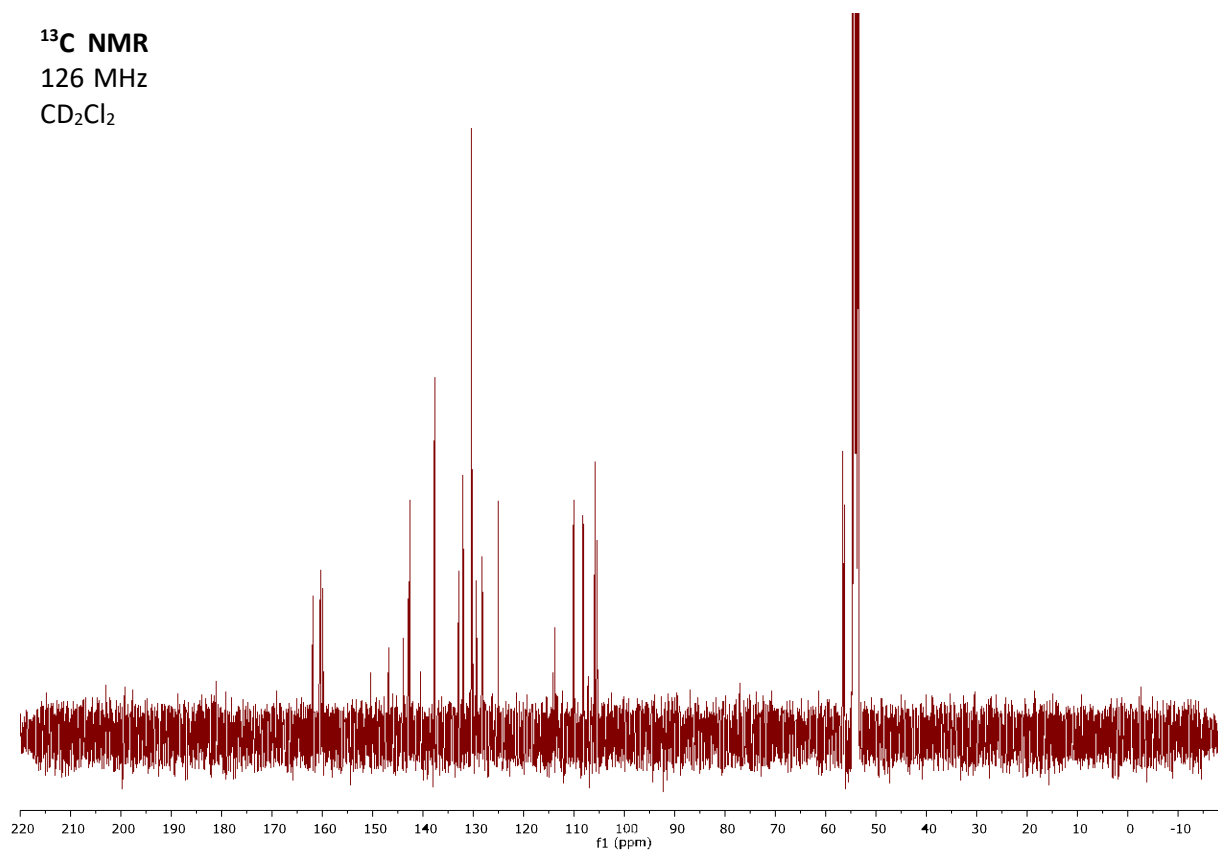

**$^{19}\text{F}$  NMR**  
282 MHz  
 $\text{CD}_2\text{Cl}_2$

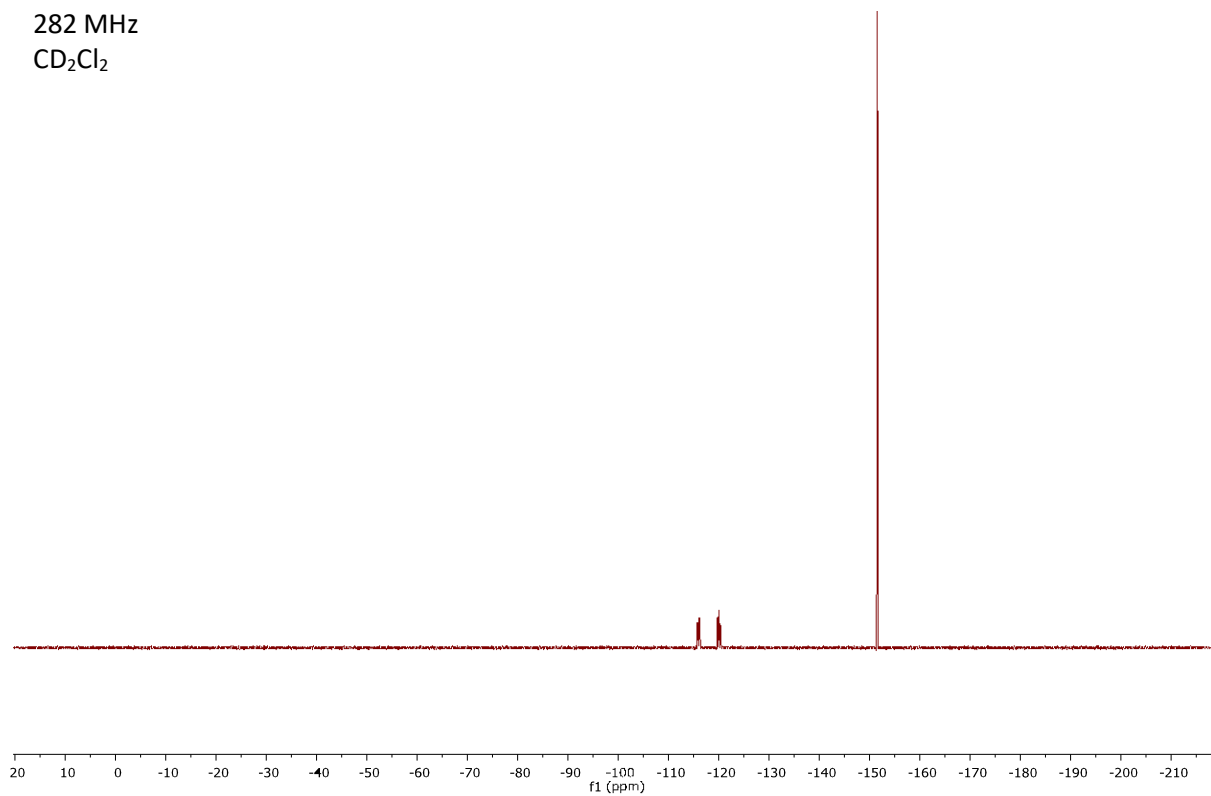



**<sup>1</sup>H NMR**  
500 MHz  
CD<sub>2</sub>Cl<sub>2</sub>

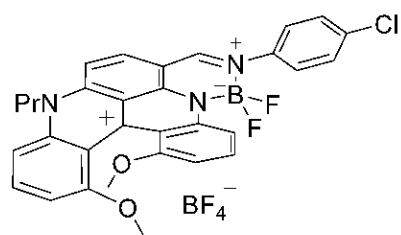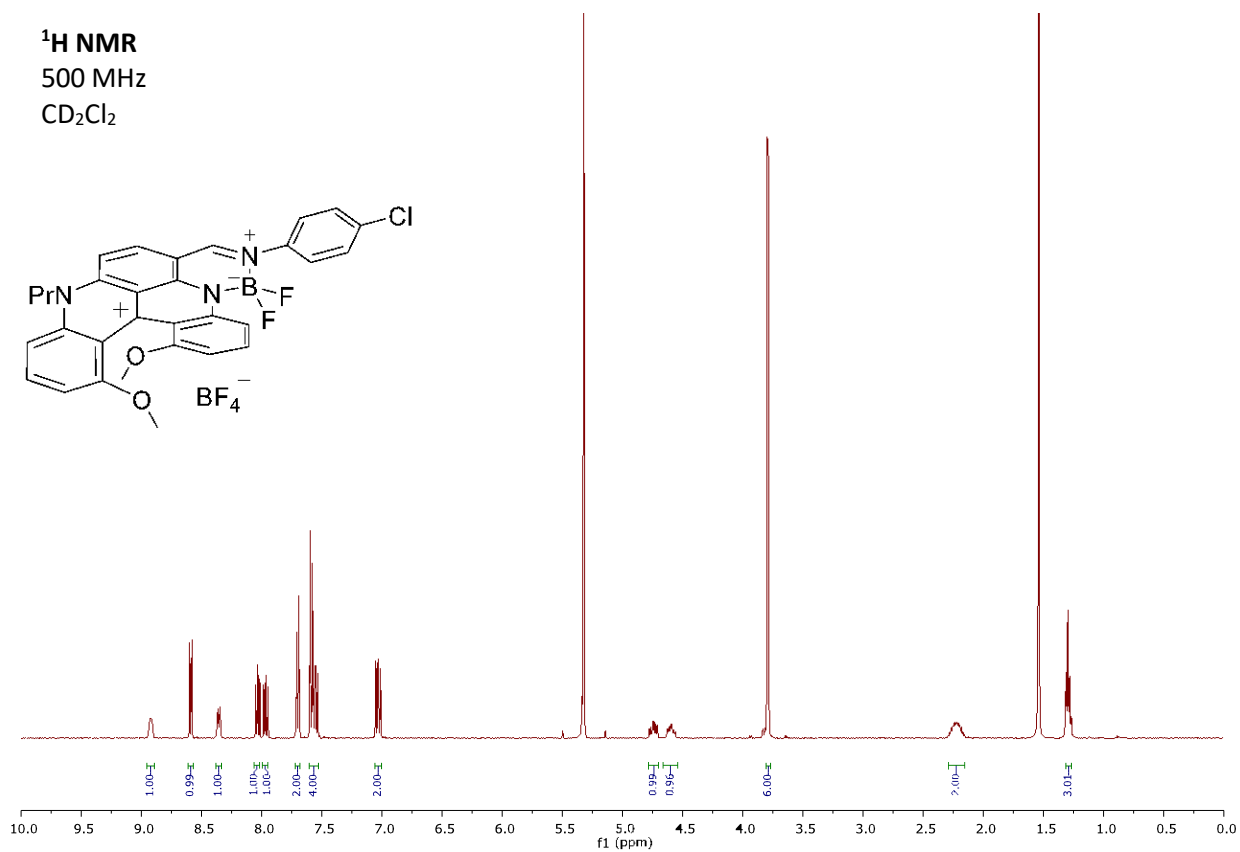

**<sup>13</sup>C NMR**  
126 MHz  
CD<sub>2</sub>Cl<sub>2</sub>

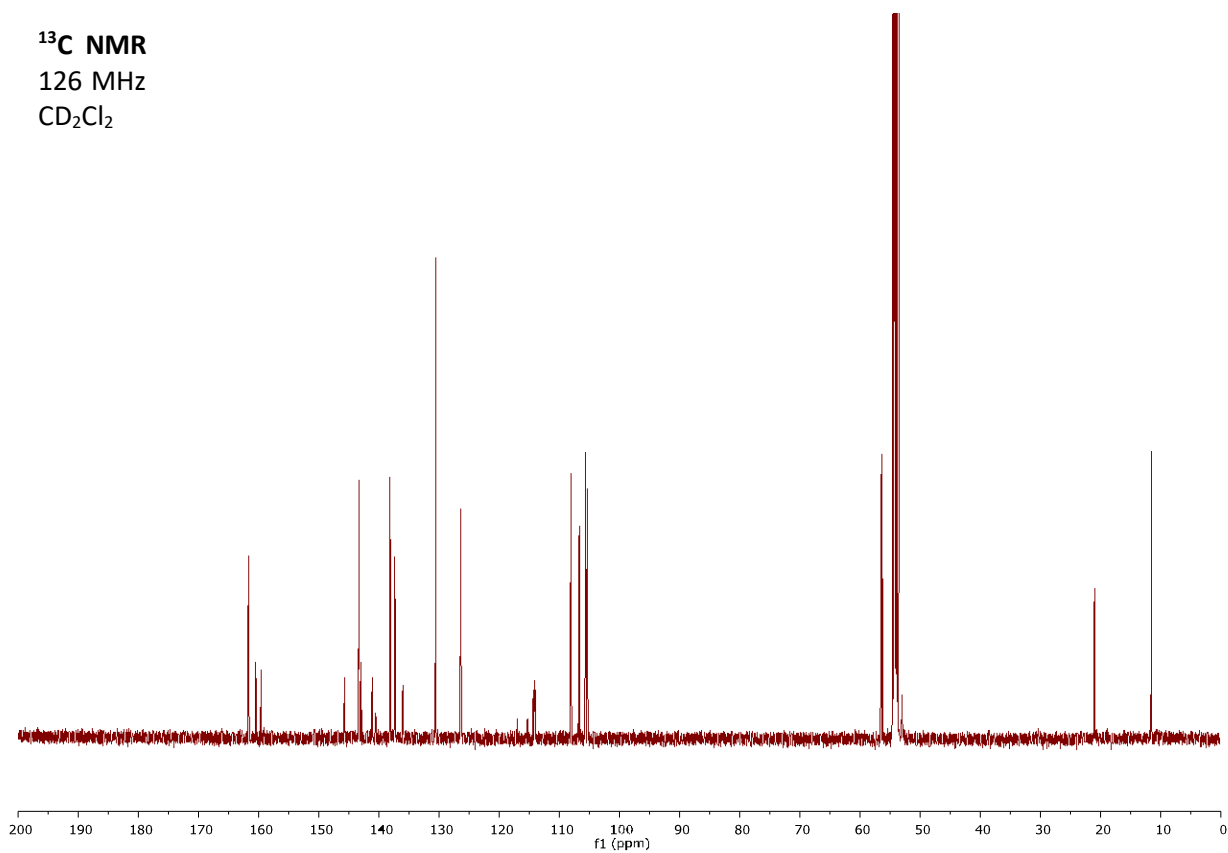

**<sup>19</sup>F NMR**  
282 MHz  
CD<sub>2</sub>Cl<sub>2</sub>

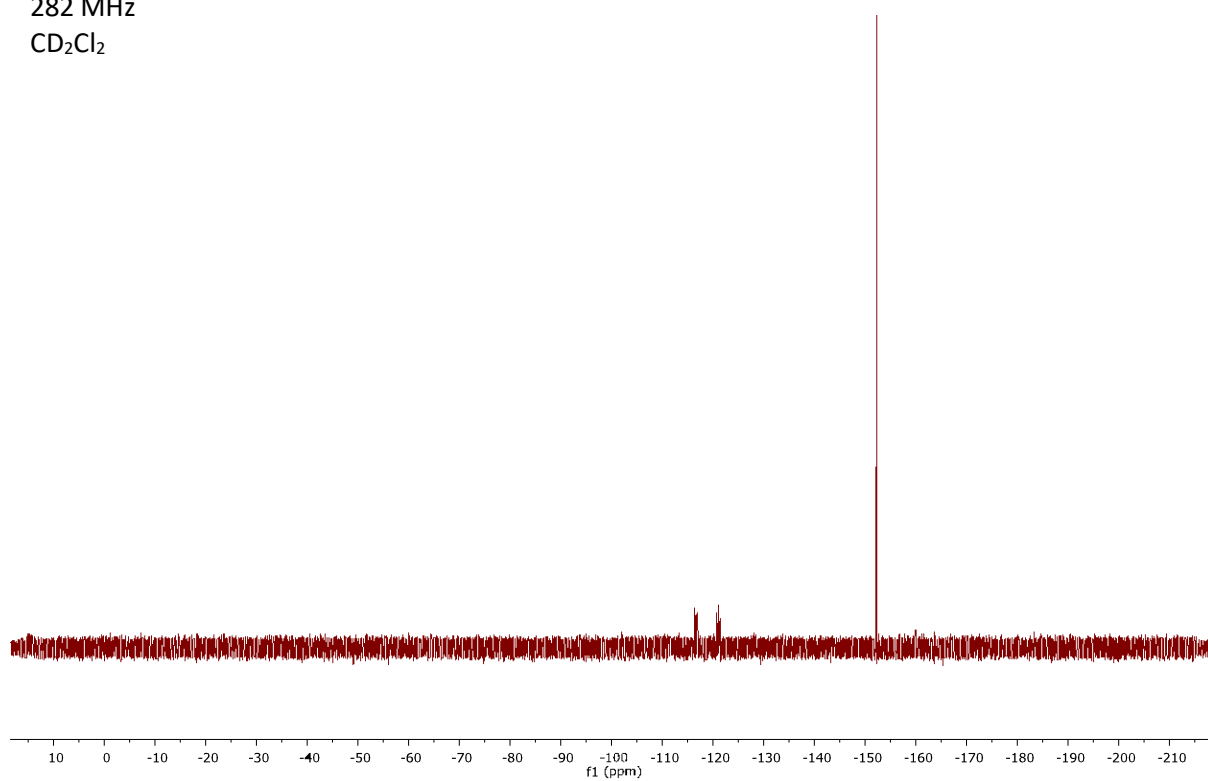

**<sup>1</sup>H NMR**  
400 MHz  
CD<sub>2</sub>Cl<sub>2</sub>

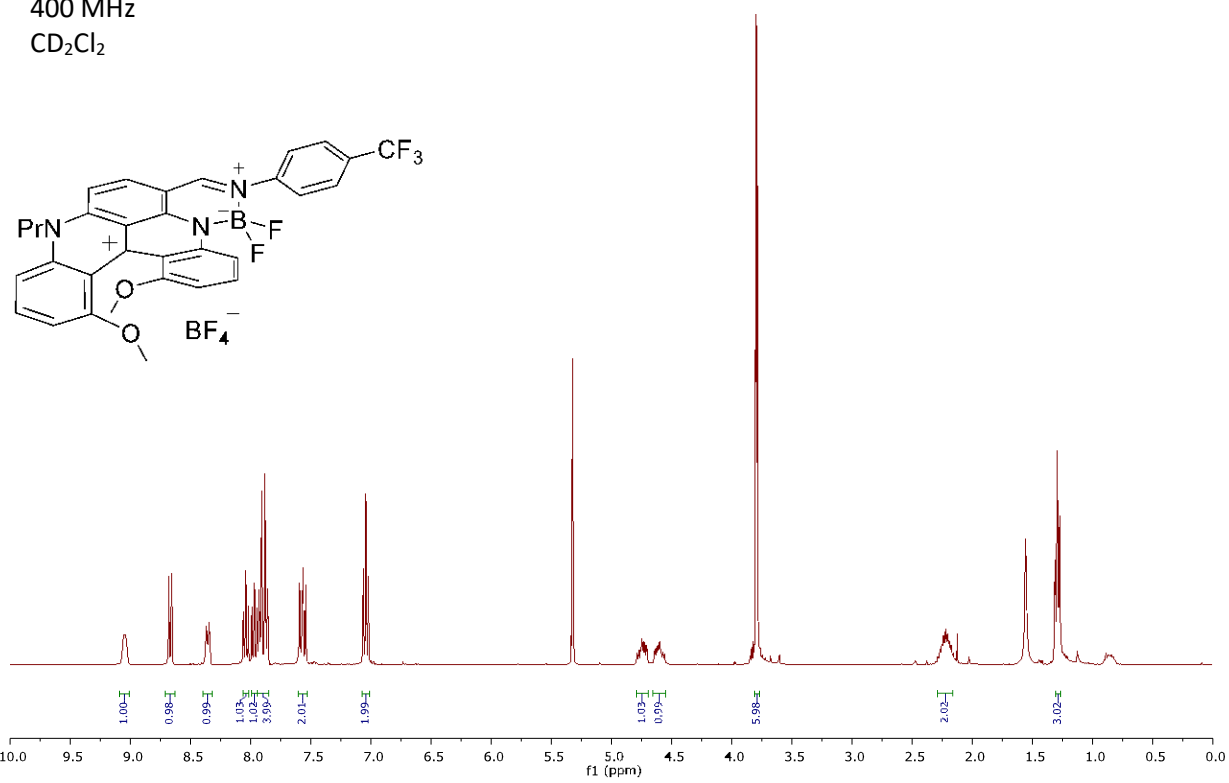

**<sup>13</sup>C NMR**  
101 MHz  
CD<sub>2</sub>Cl<sub>2</sub>

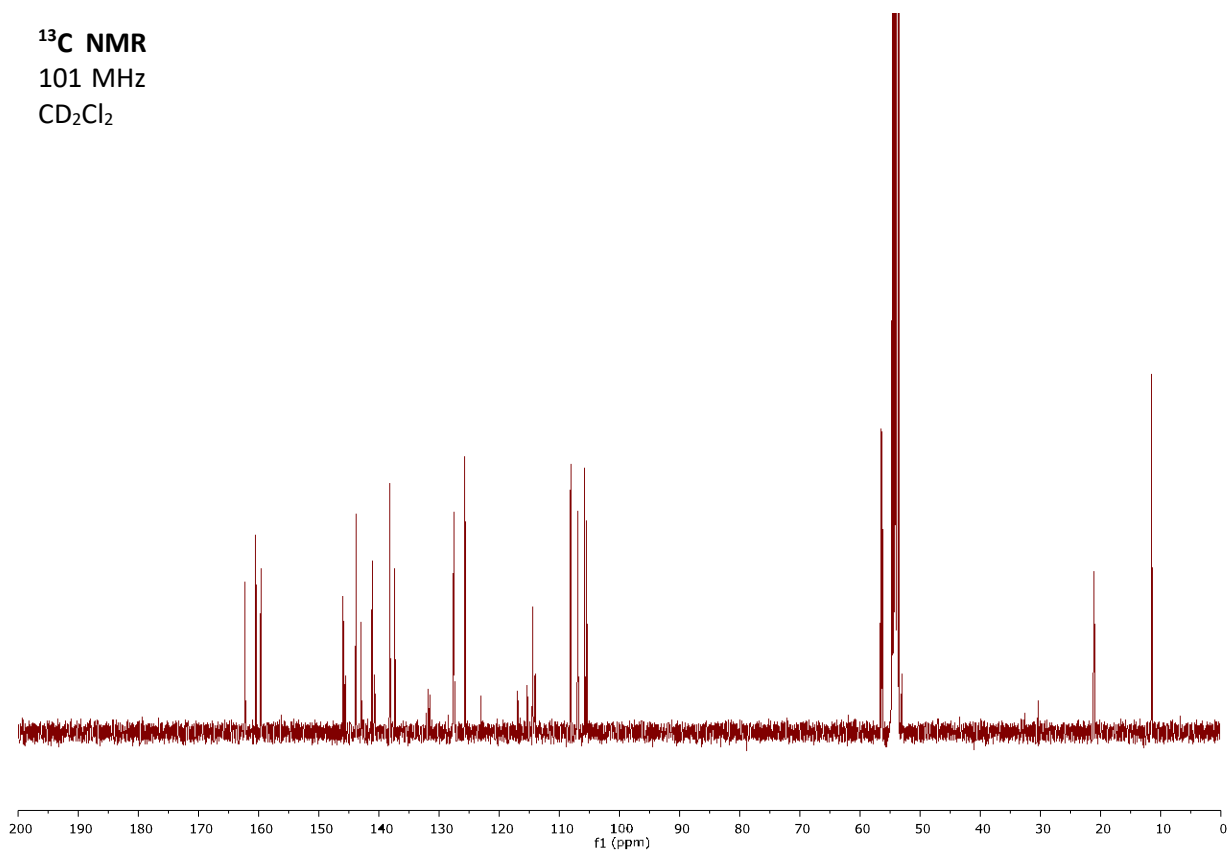

**<sup>19</sup>F NMR**  
282 MHz  
CD<sub>2</sub>Cl<sub>2</sub>

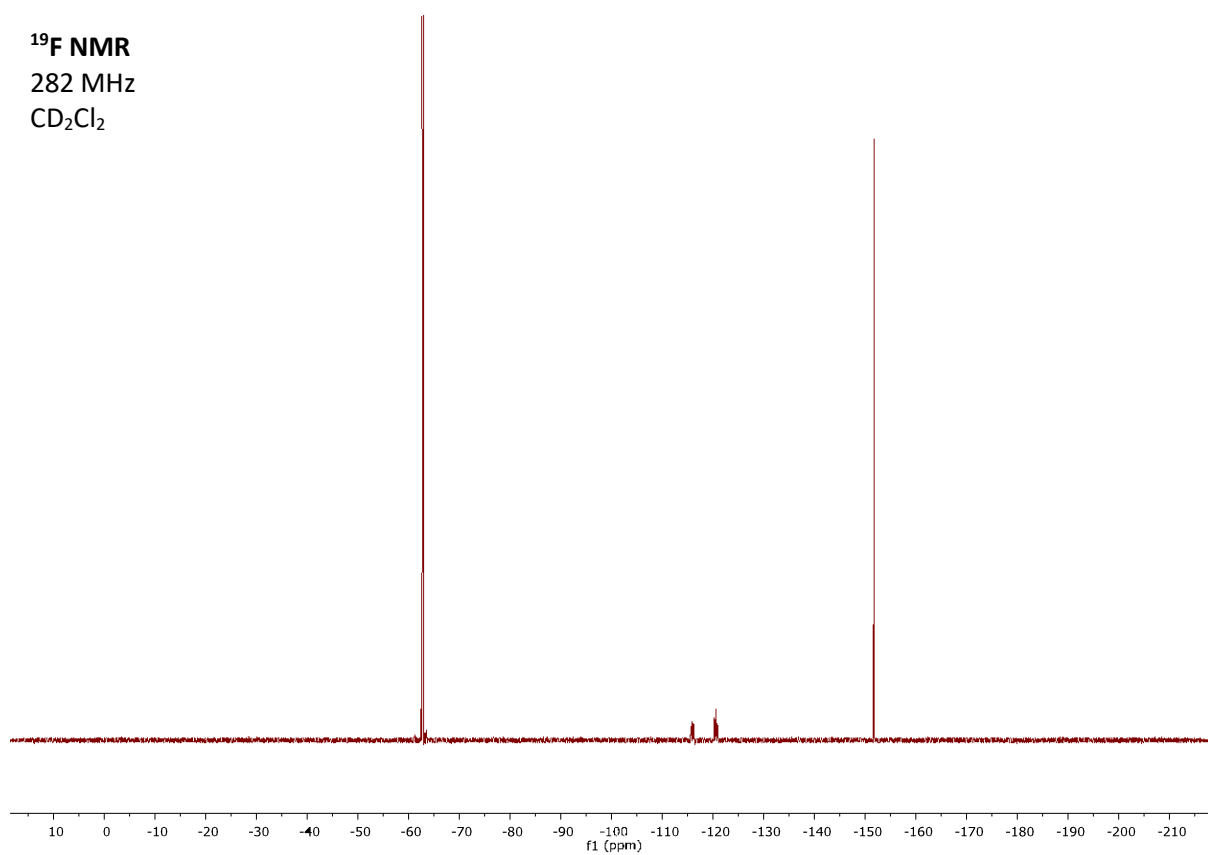

**<sup>1</sup>H NMR**  
400 MHz  
CD<sub>2</sub>Cl<sub>2</sub>

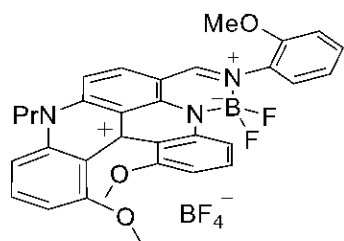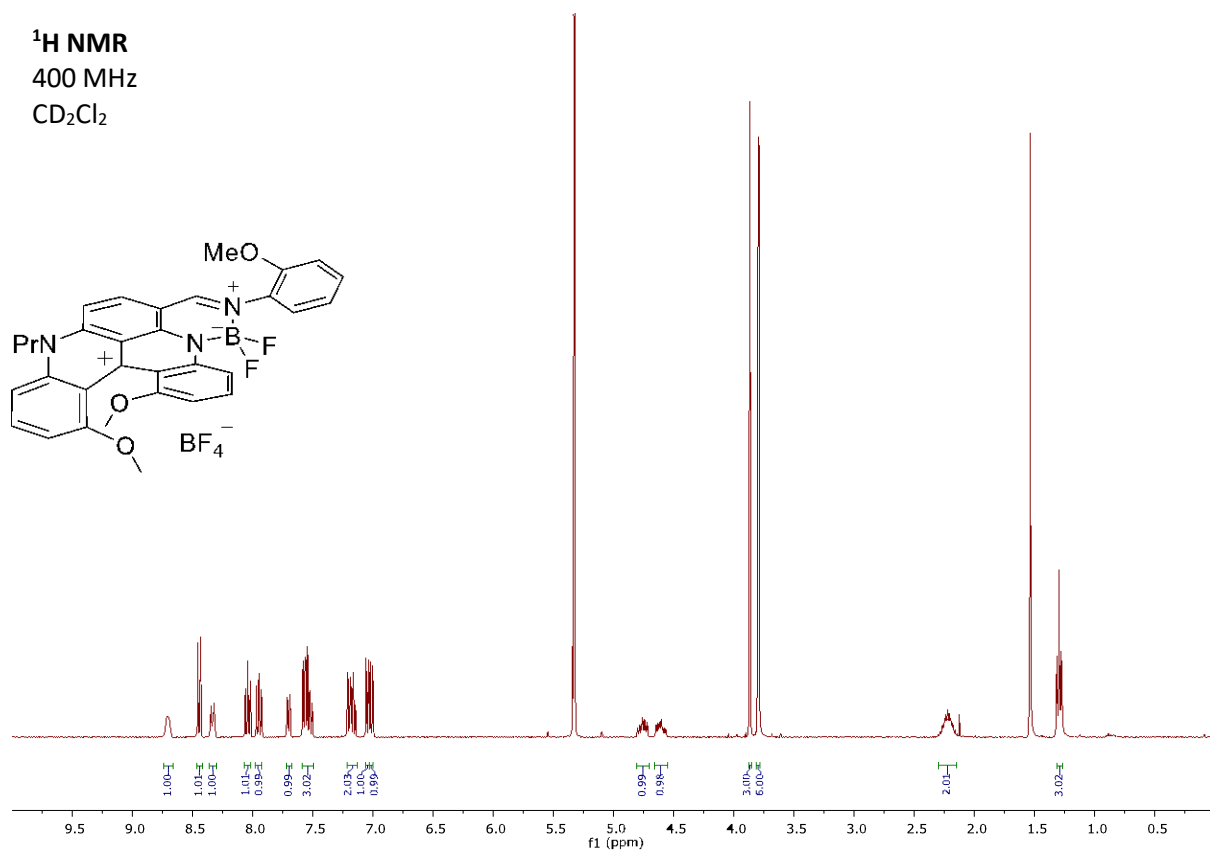

**<sup>13</sup>C NMR**  
101 MHz  
CD<sub>2</sub>Cl<sub>2</sub>

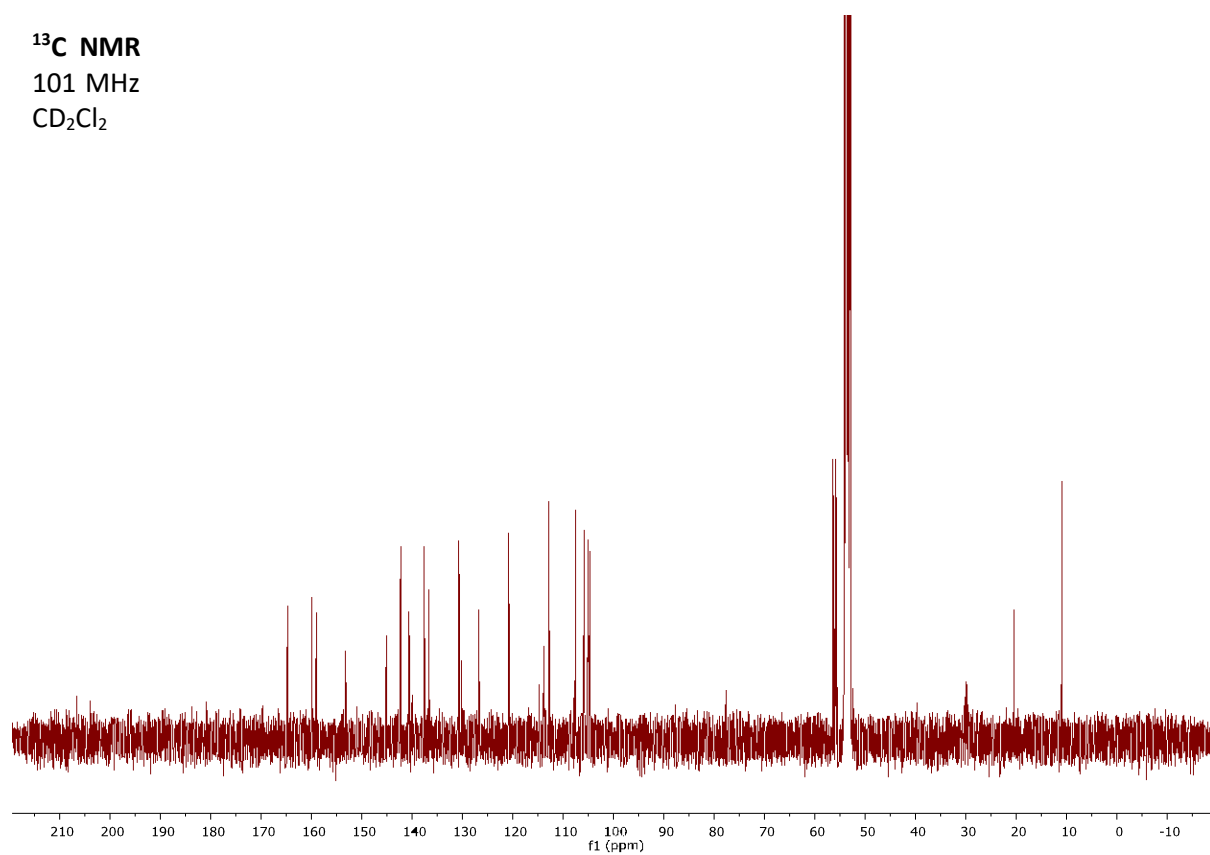

**<sup>19</sup>F NMR**  
282 MHz  
CD<sub>2</sub>Cl<sub>2</sub>

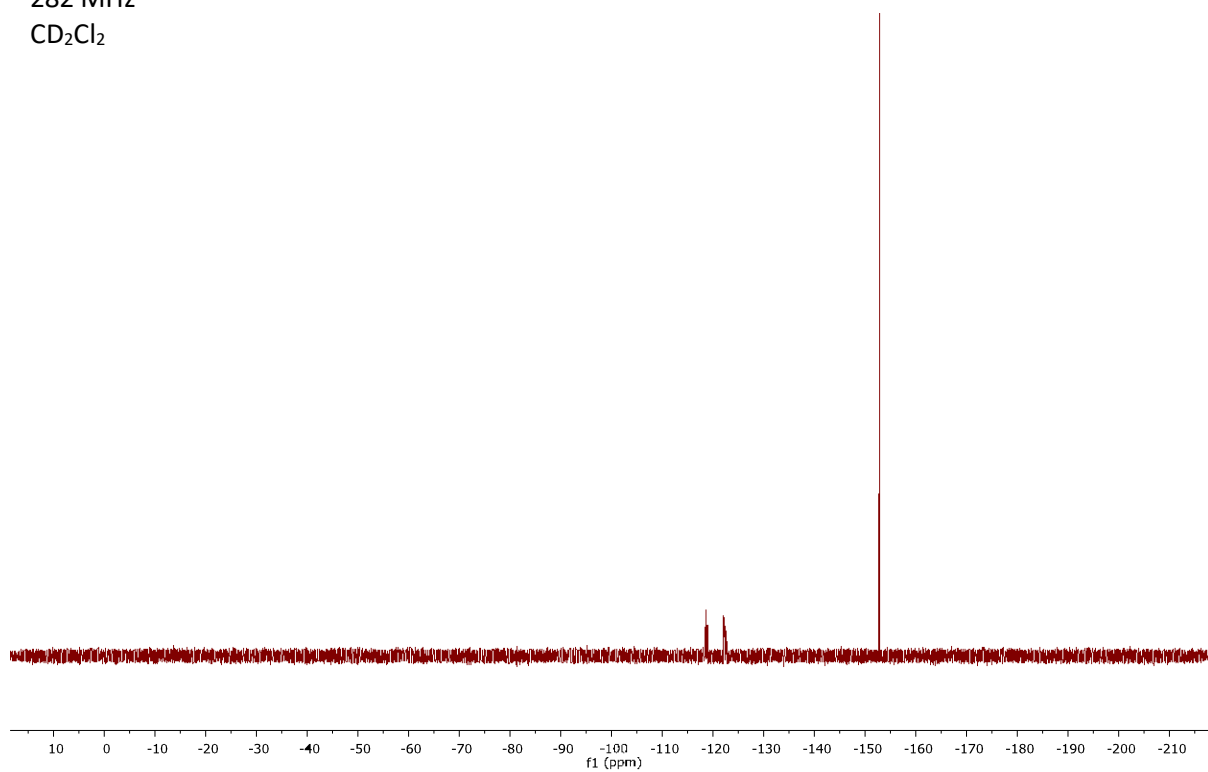

**<sup>1</sup>H NMR**  
400 MHz  
CD<sub>2</sub>Cl<sub>2</sub>

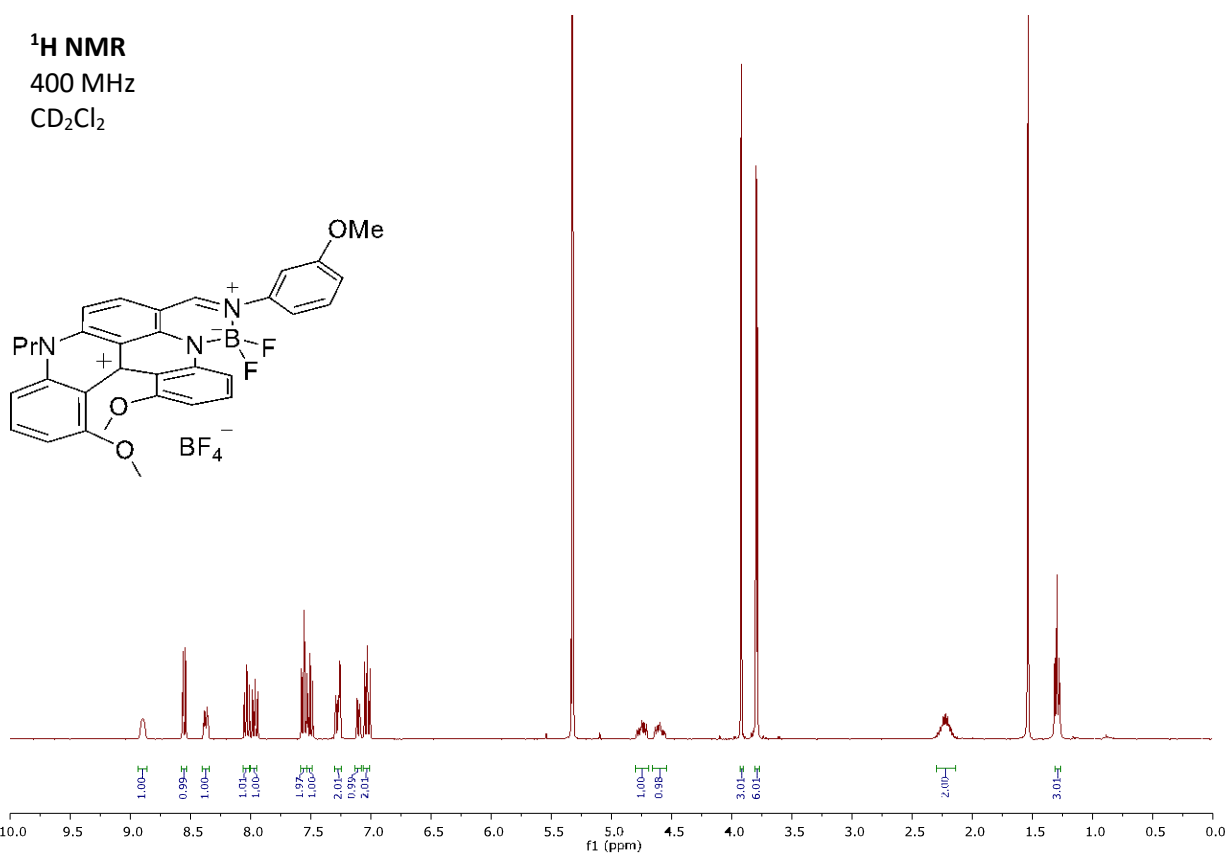

**<sup>13</sup>C NMR**  
101 MHz  
CD<sub>2</sub>Cl<sub>2</sub>

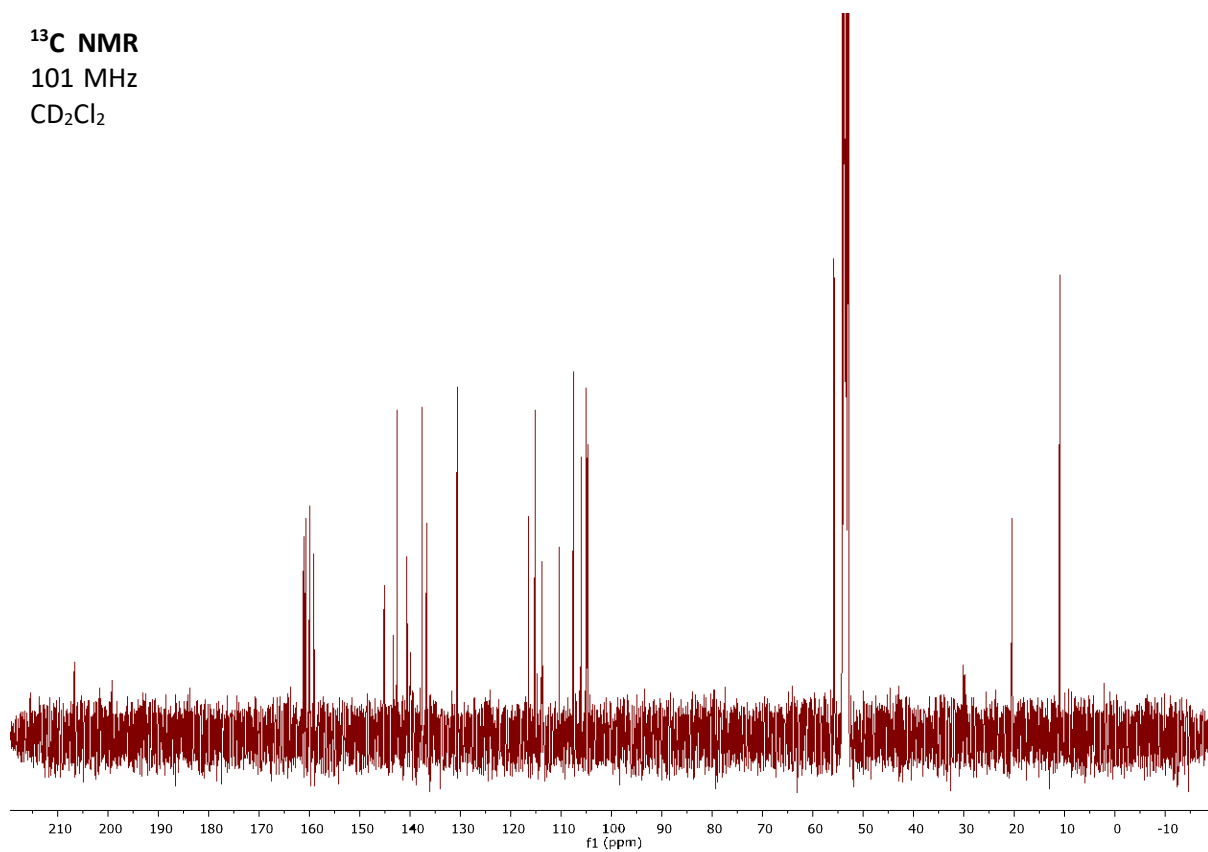

**<sup>19</sup>F NMR**  
282 MHz  
CD<sub>2</sub>Cl<sub>2</sub>

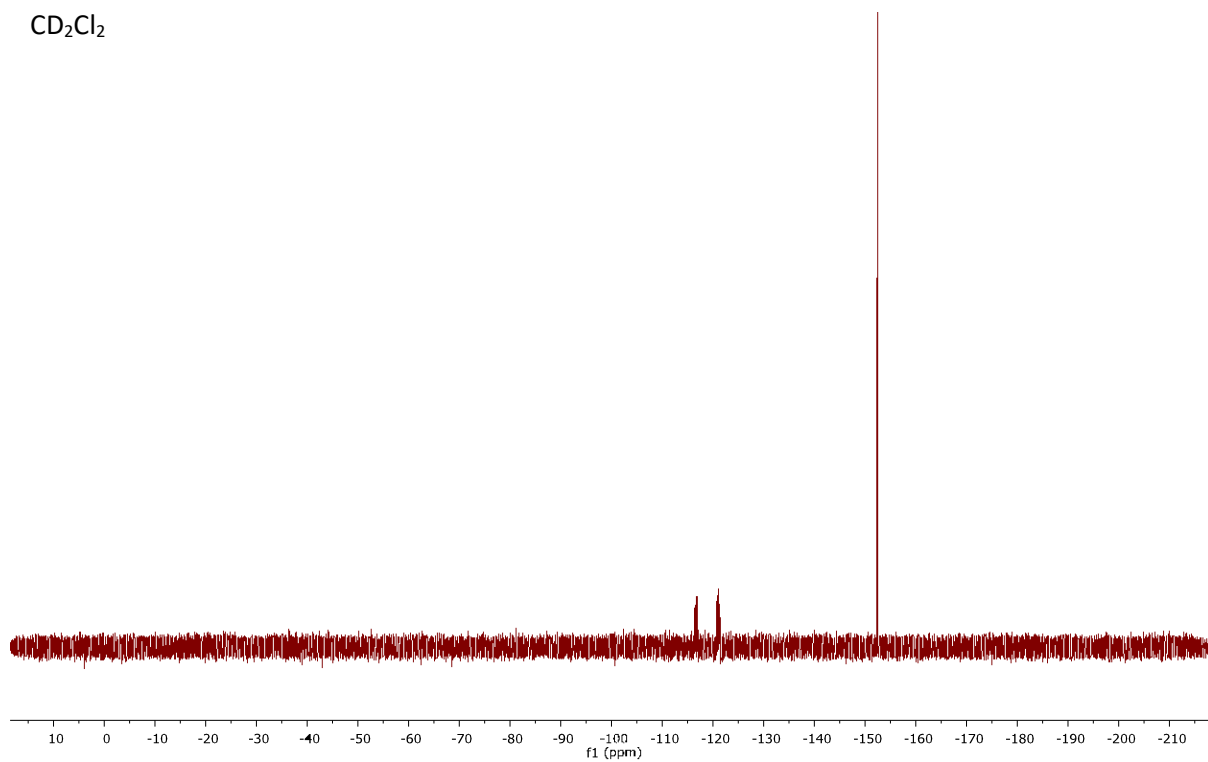

**<sup>1</sup>H NMR**  
400 MHz  
CD<sub>2</sub>Cl<sub>2</sub>

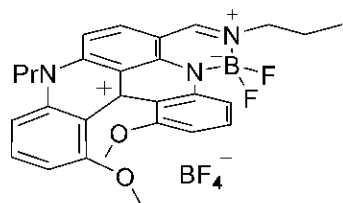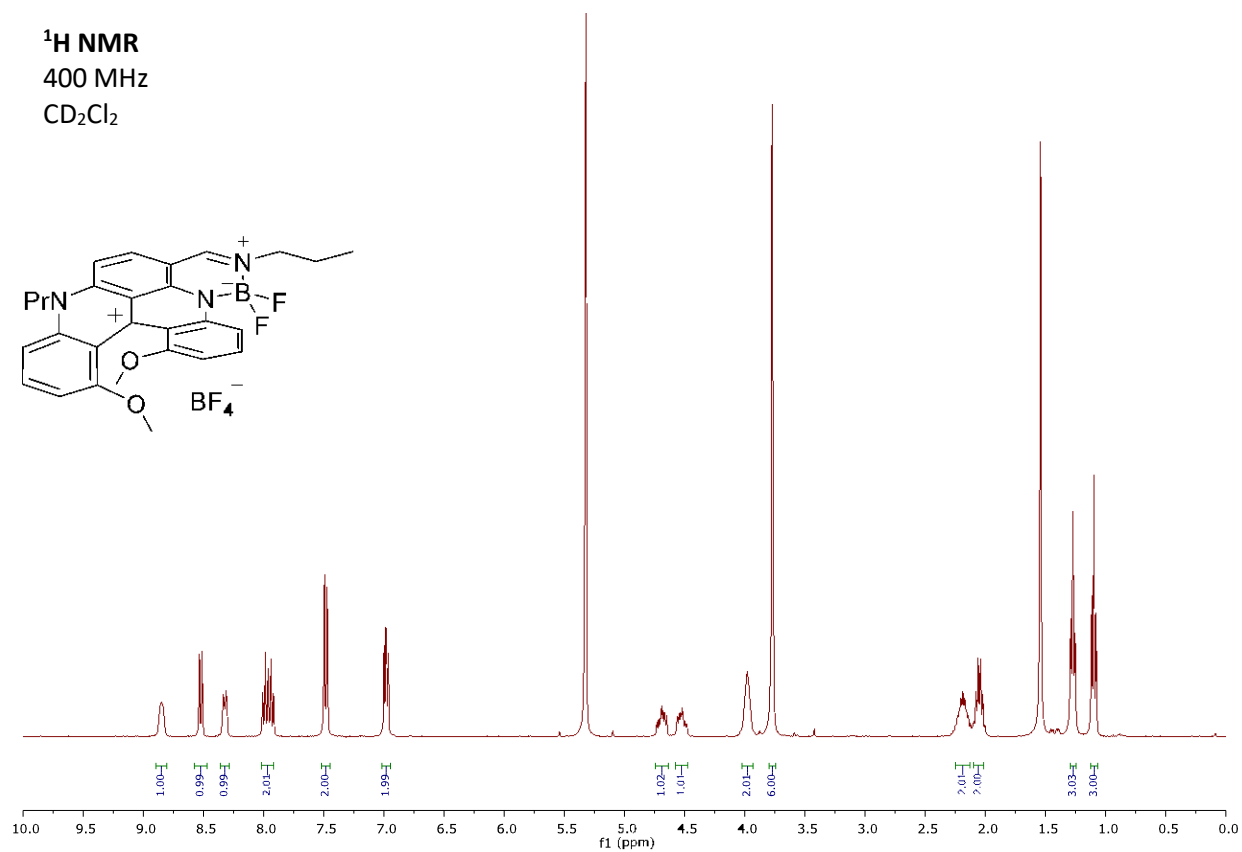

**<sup>13</sup>C NMR**  
101 MHz  
CD<sub>2</sub>Cl<sub>2</sub>

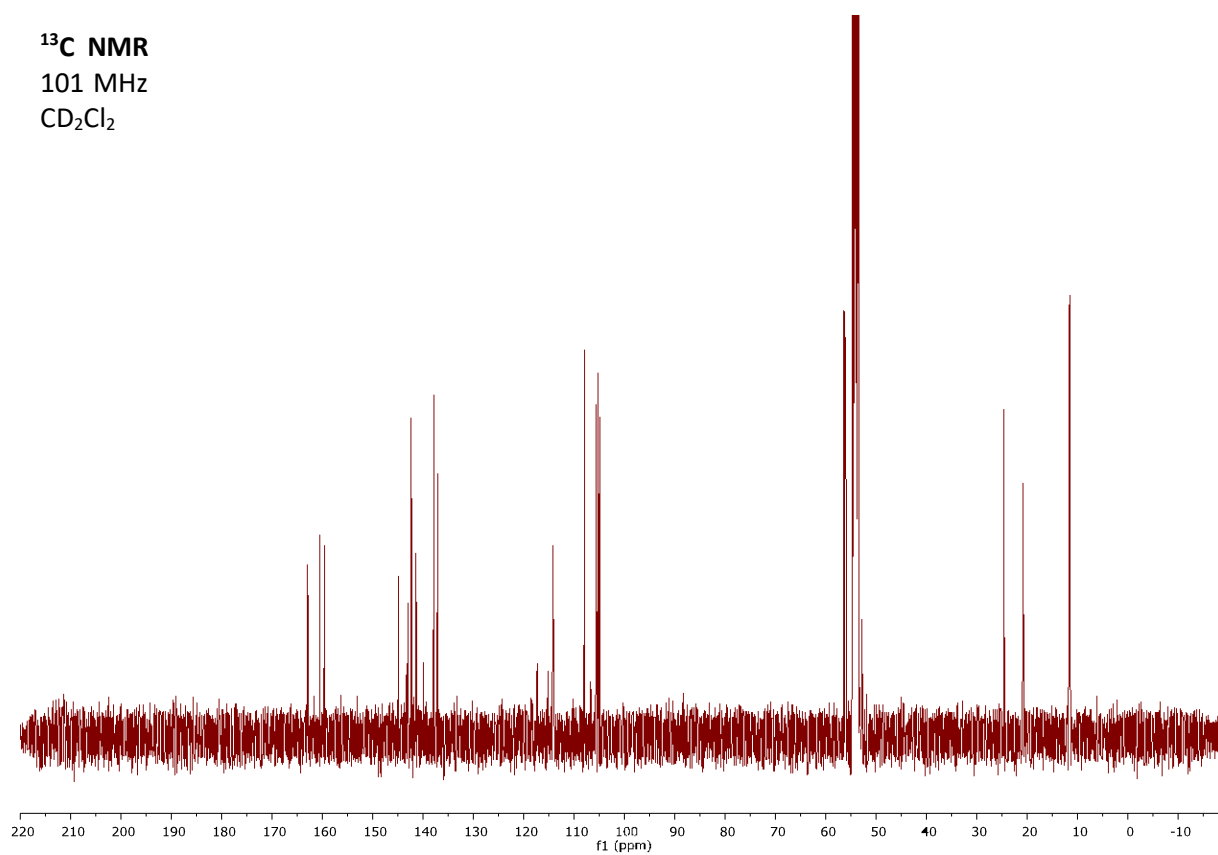

**$^{19}\text{F}$  NMR**  
282 MHz  
 $\text{CD}_2\text{Cl}_2$

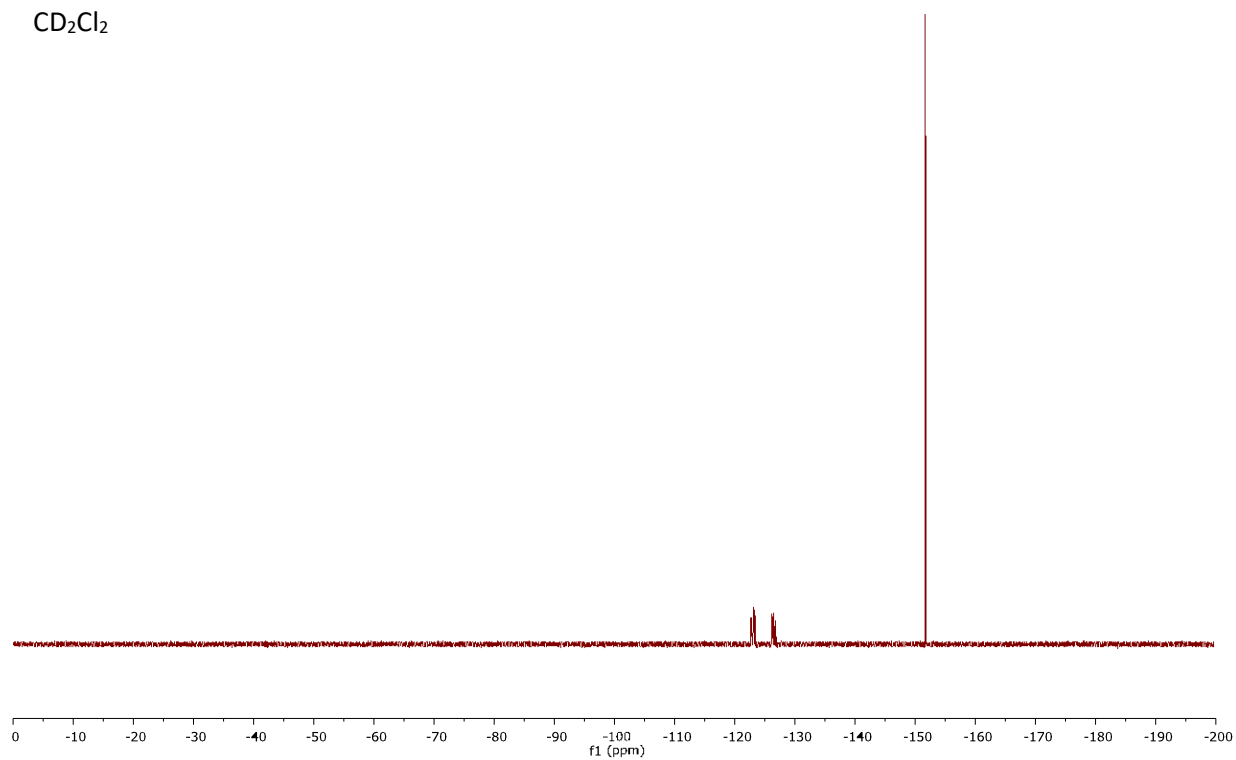

**$^1\text{H}$  NMR**  
400 MHz  
 $\text{CD}_2\text{Cl}_2$

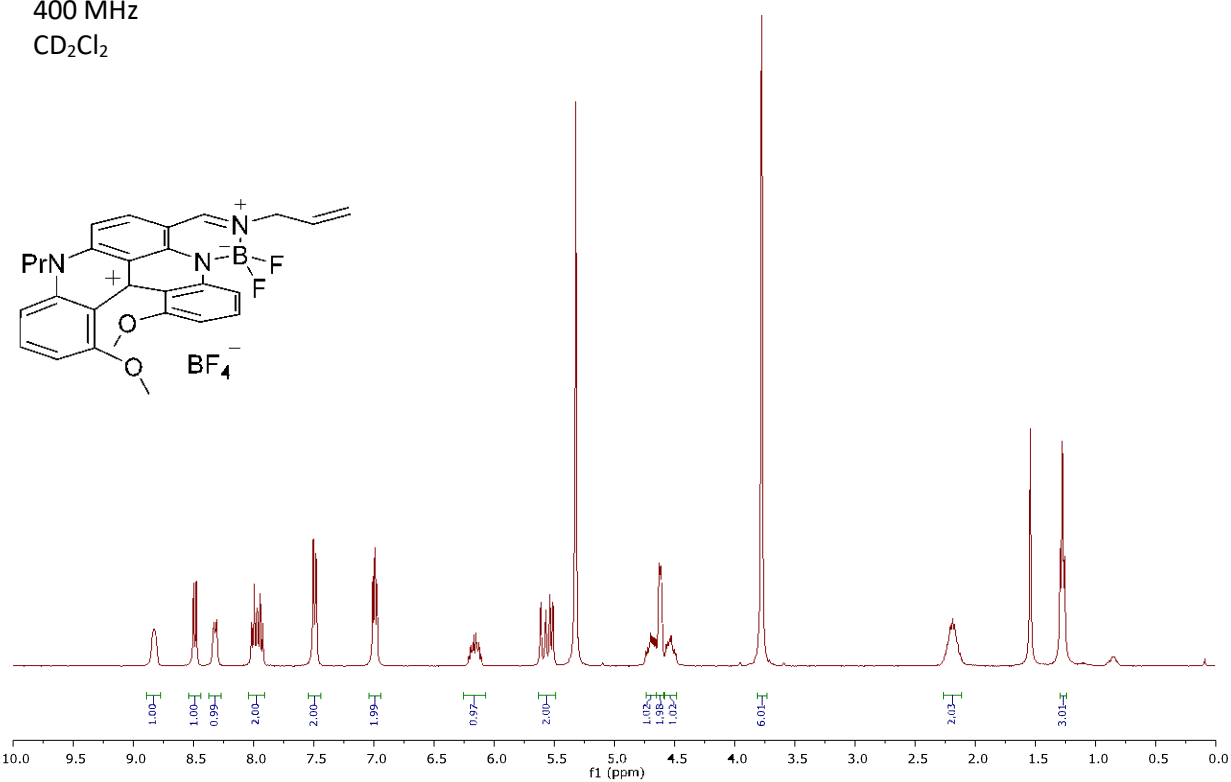



**<sup>13</sup>C NMR**  
101 MHz  
CD<sub>2</sub>Cl<sub>2</sub>

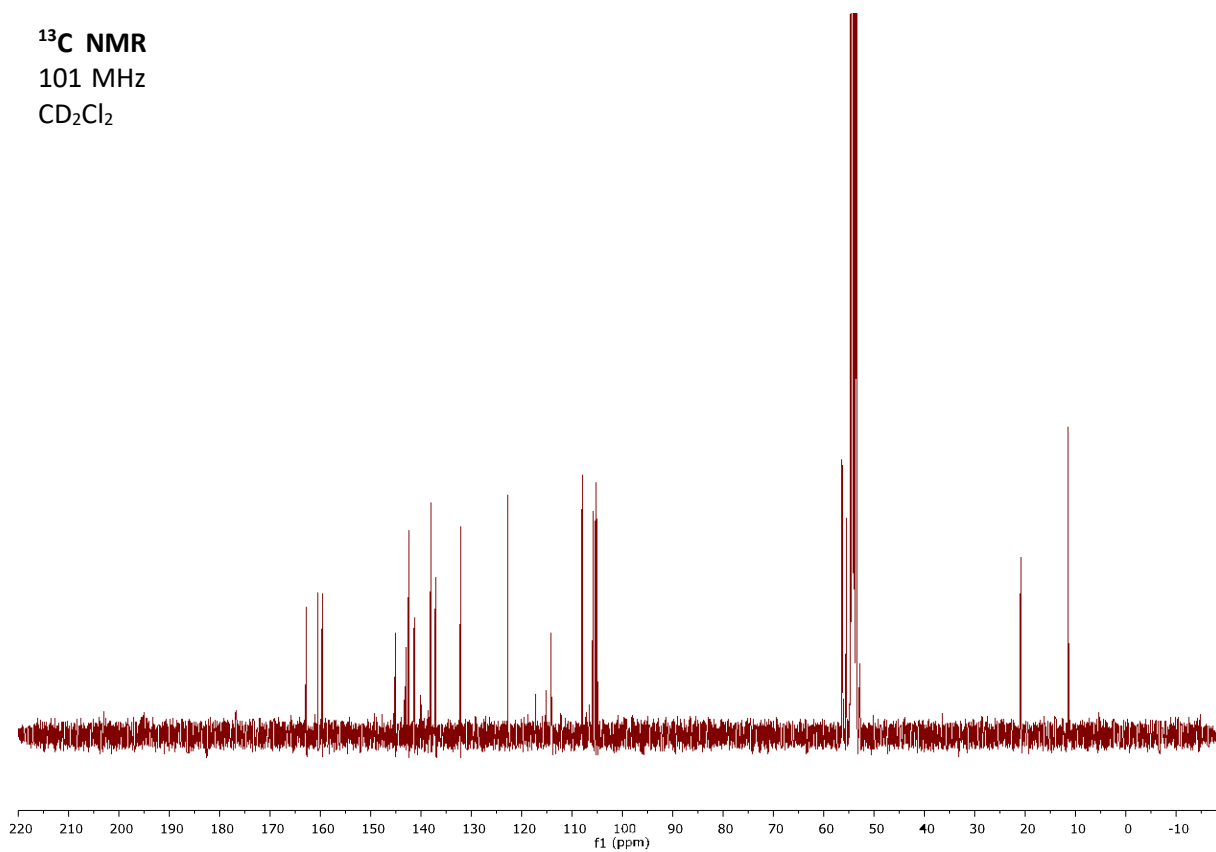

**<sup>19</sup>F NMR**  
282 MHz  
CD<sub>2</sub>Cl<sub>2</sub>

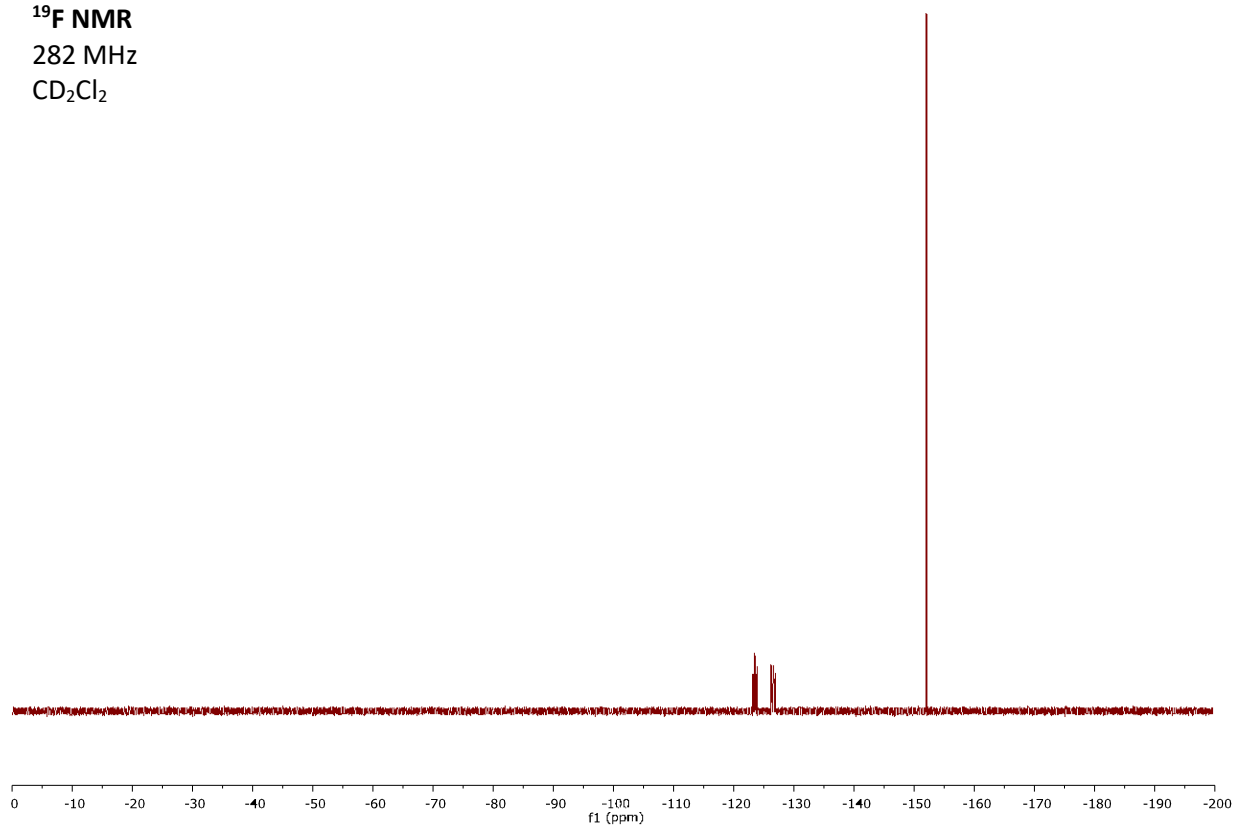

**<sup>1</sup>H NMR**  
400 MHz  
CD<sub>2</sub>Cl<sub>2</sub>

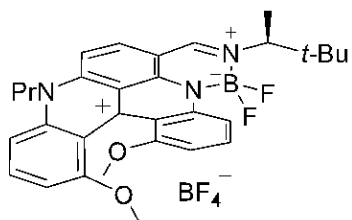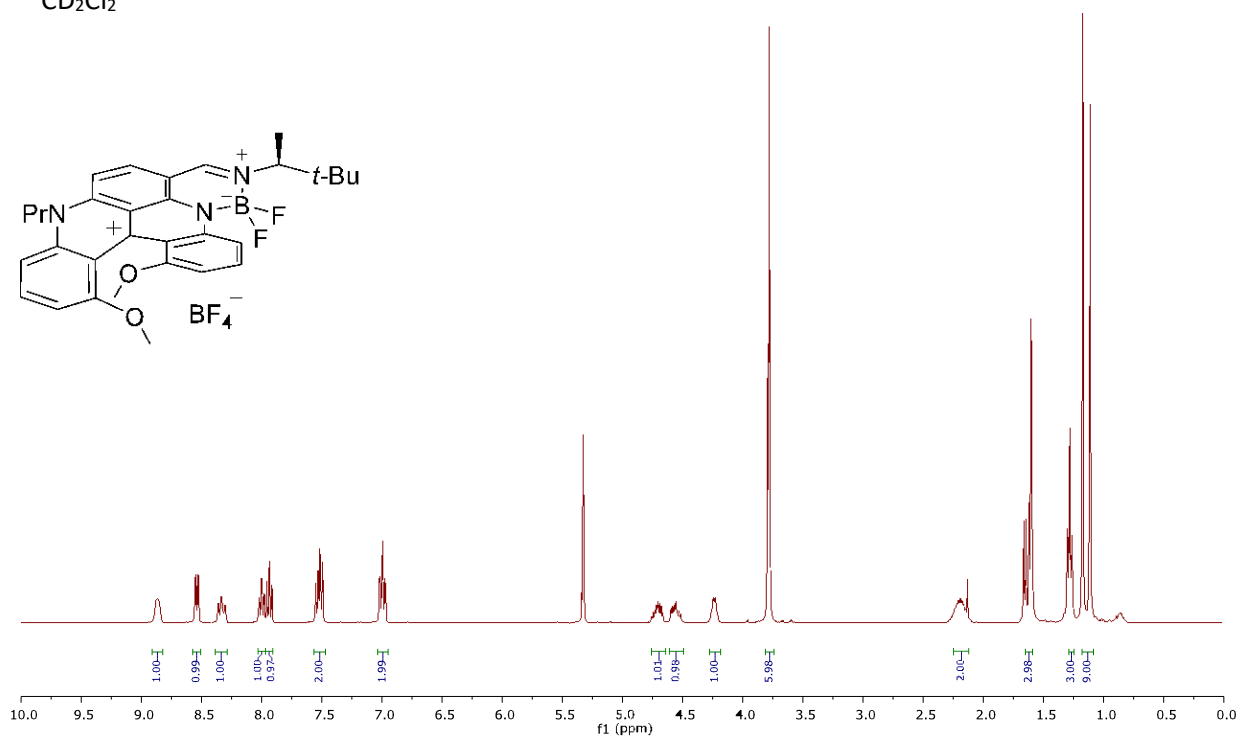

**<sup>13</sup>C NMR**  
101 MHz  
CD<sub>2</sub>Cl<sub>2</sub>

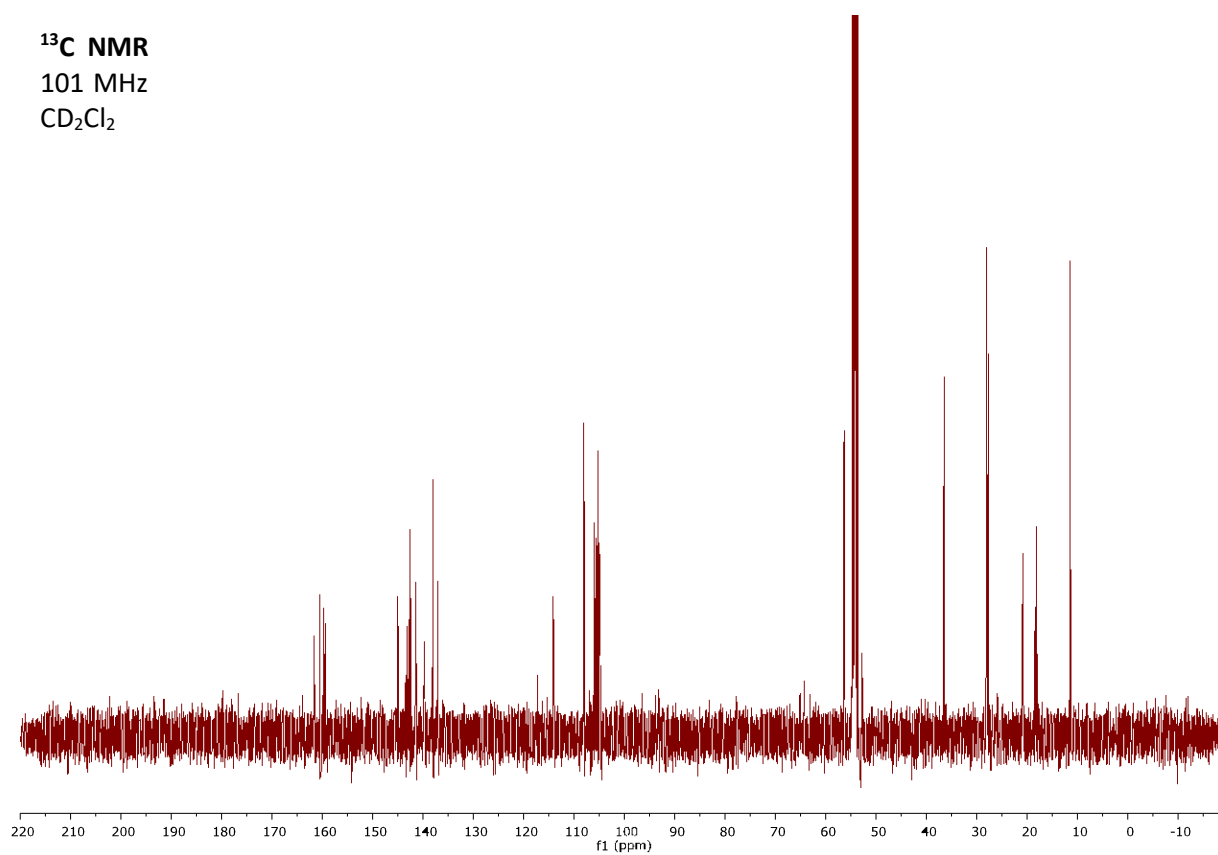

**<sup>19</sup>F NMR**  
282 MHz  
CD<sub>2</sub>Cl<sub>2</sub>

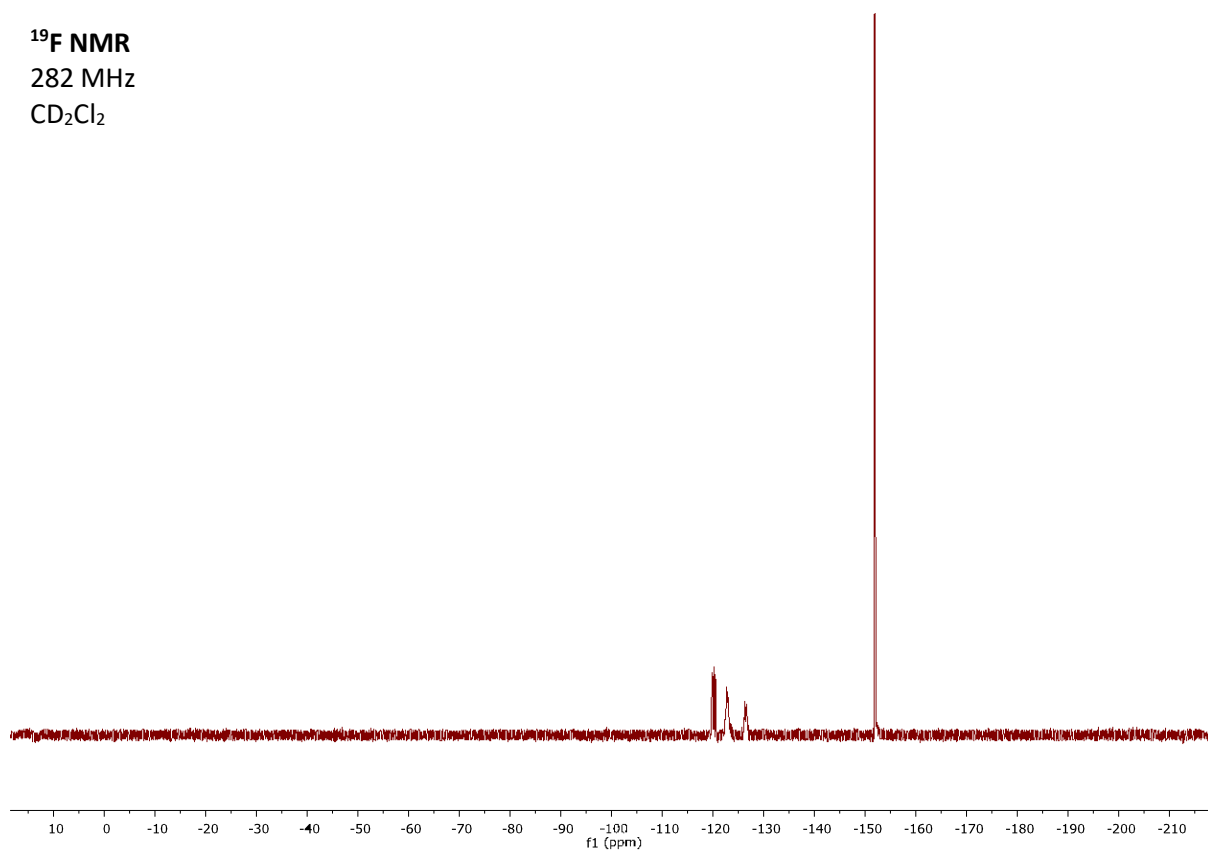

**<sup>1</sup>H NMR**  
400 MHz  
CD<sub>2</sub>Cl<sub>2</sub>

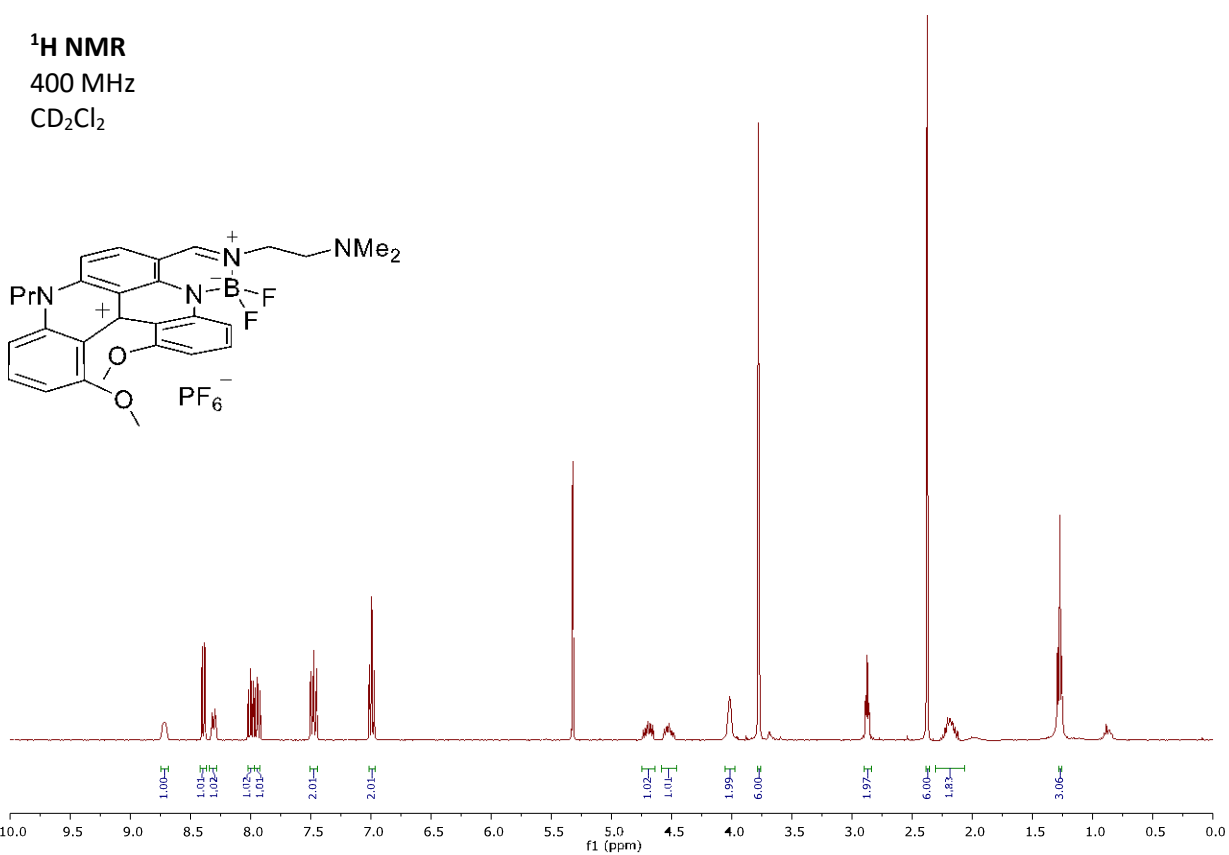

**$^{13}\text{C}$  NMR**  
101 MHz  
 $\text{CD}_2\text{Cl}_2$

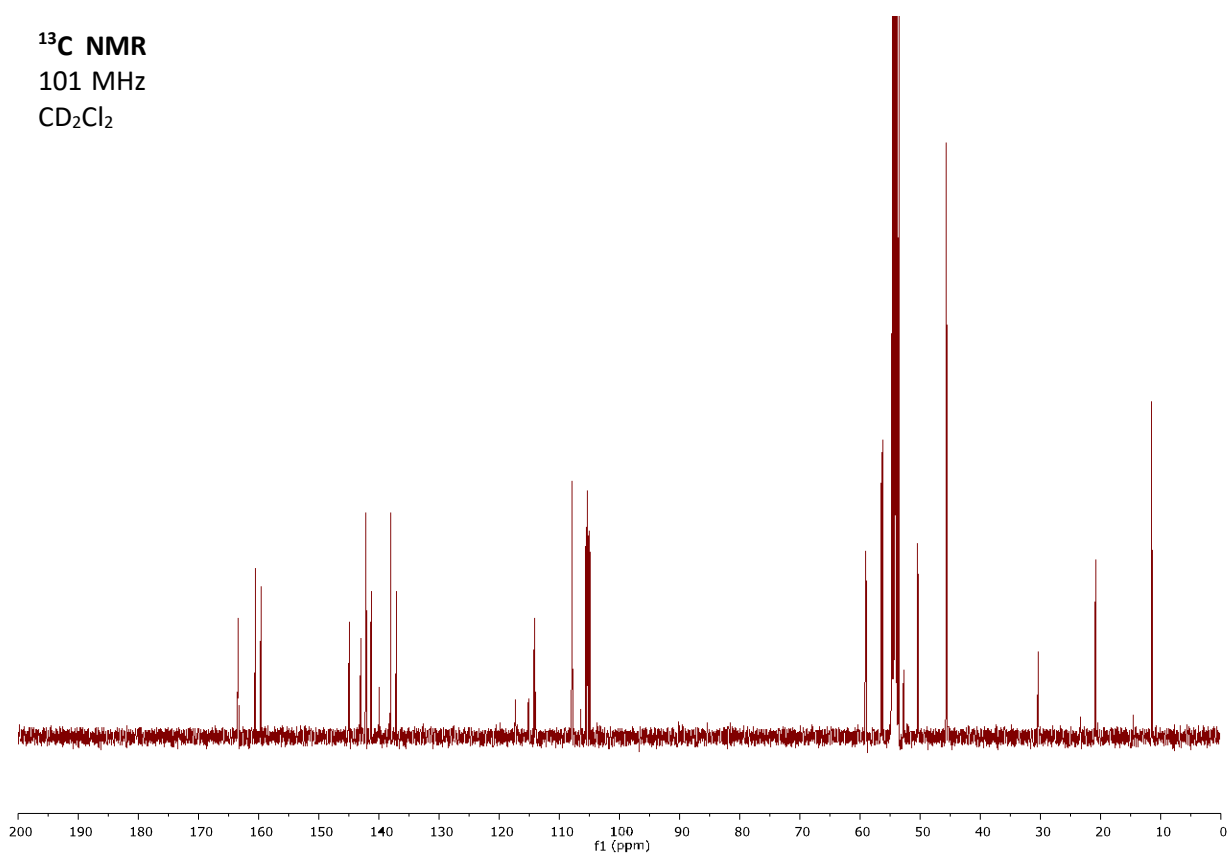

**$^{19}\text{F}$  NMR**  
282 MHz  
 $\text{CD}_2\text{Cl}_2$

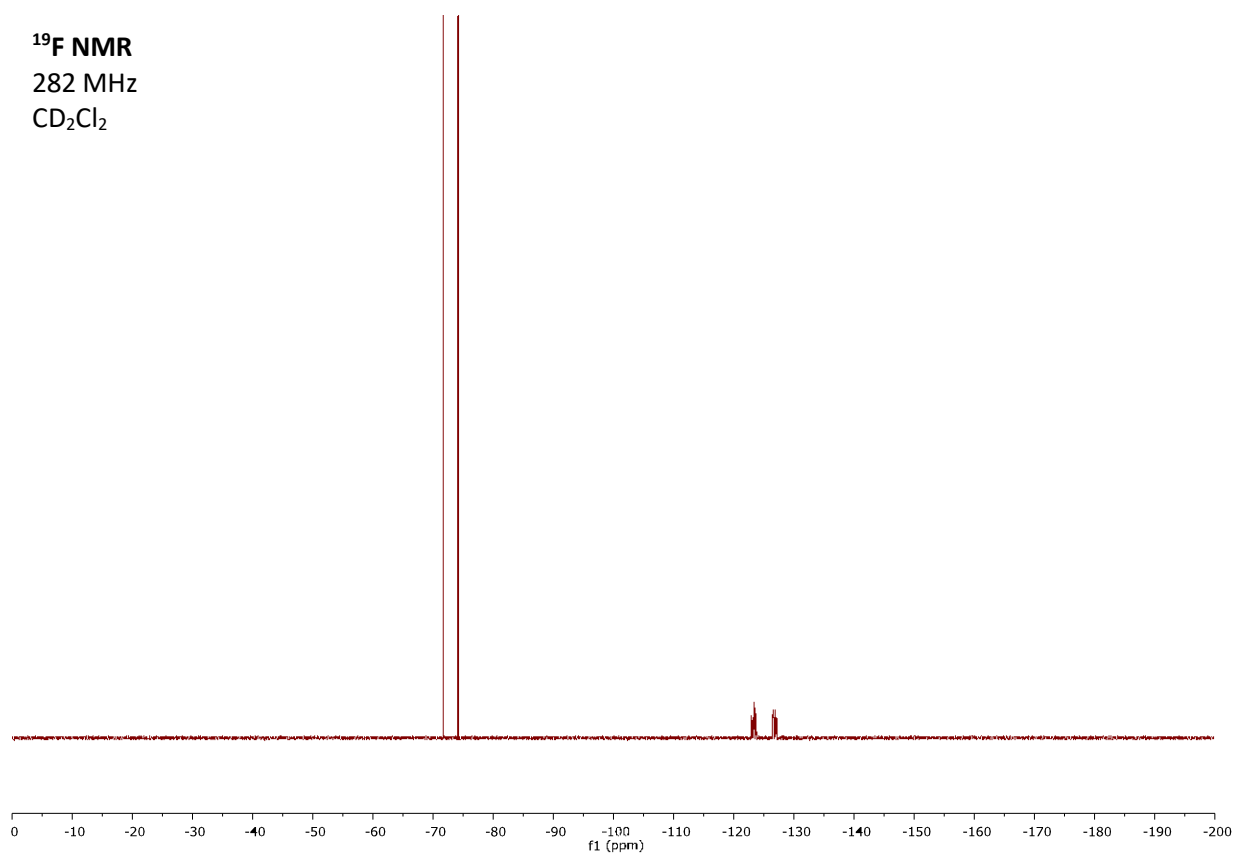

**<sup>1</sup>H NMR**  
400 MHz  
CD<sub>2</sub>Cl<sub>2</sub>

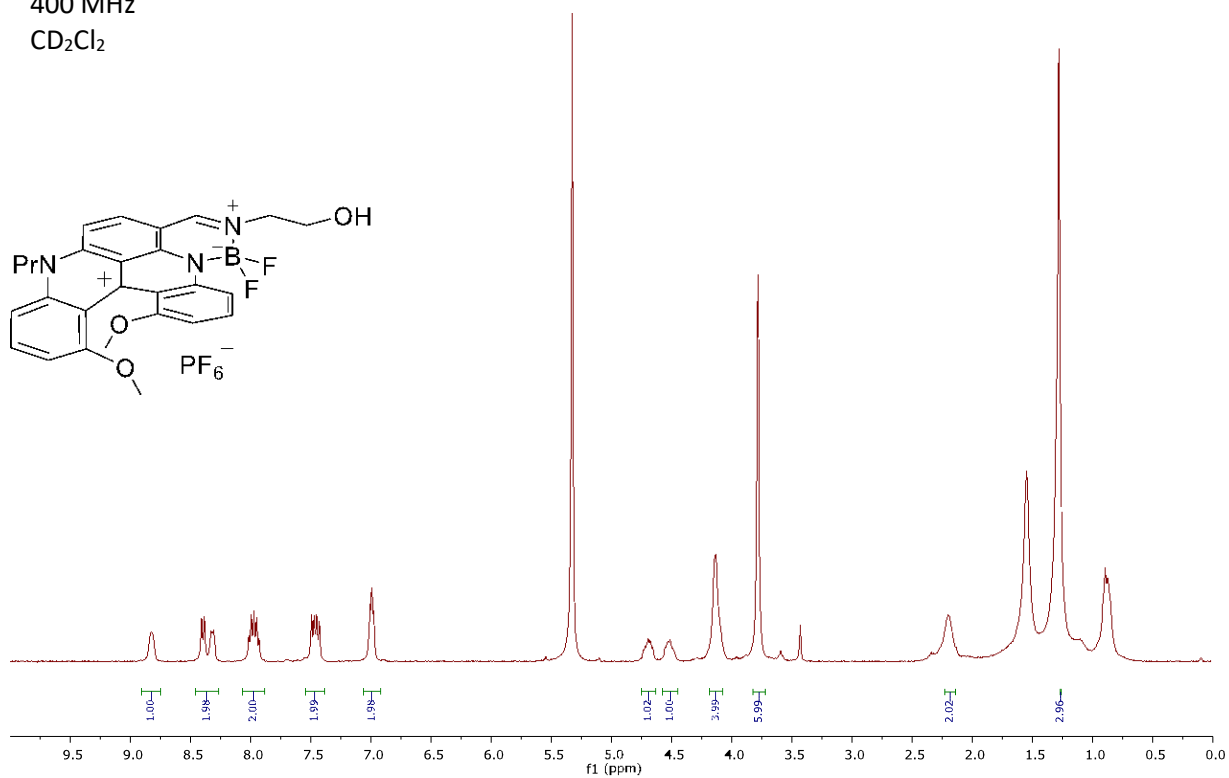

**<sup>13</sup>C NMR**  
101 MHz  
CD<sub>2</sub>Cl<sub>2</sub>

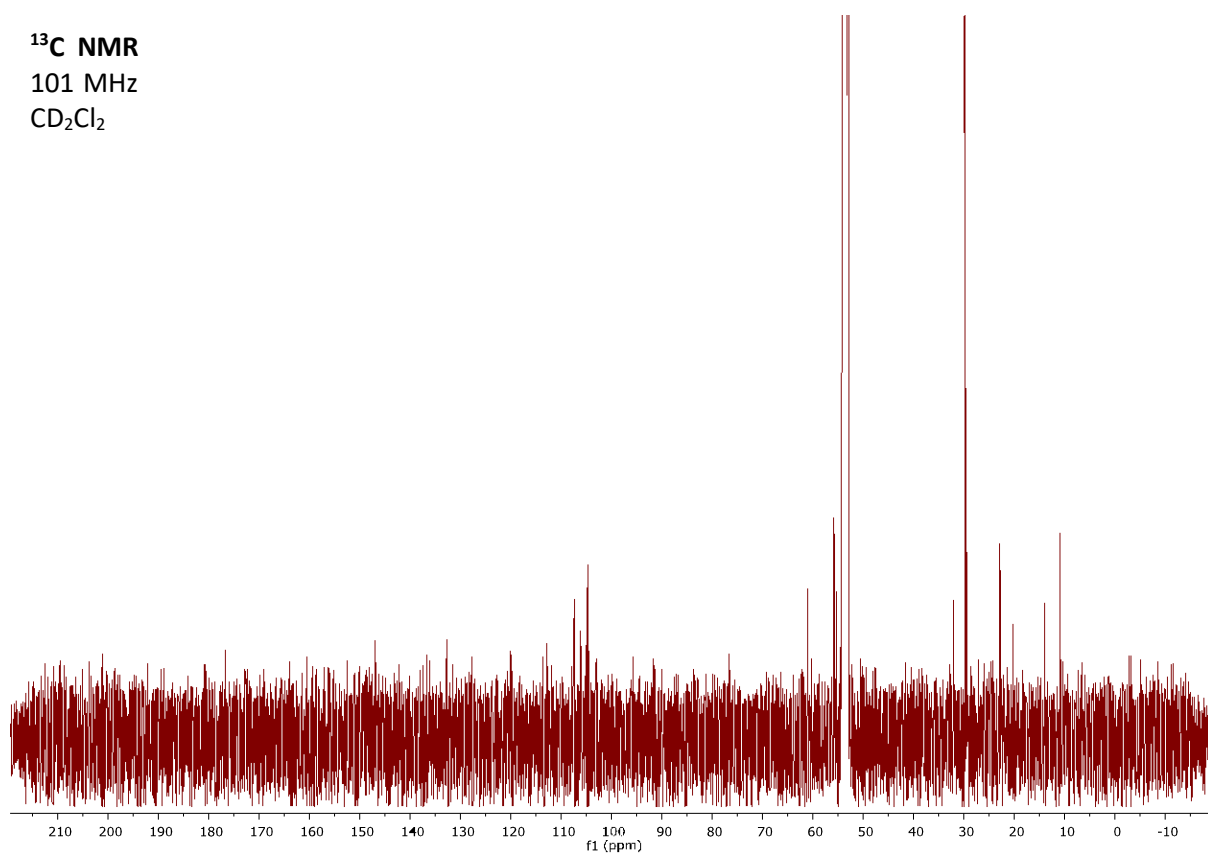

**<sup>19</sup>F NMR**  
282 MHz  
CD<sub>2</sub>Cl<sub>2</sub>

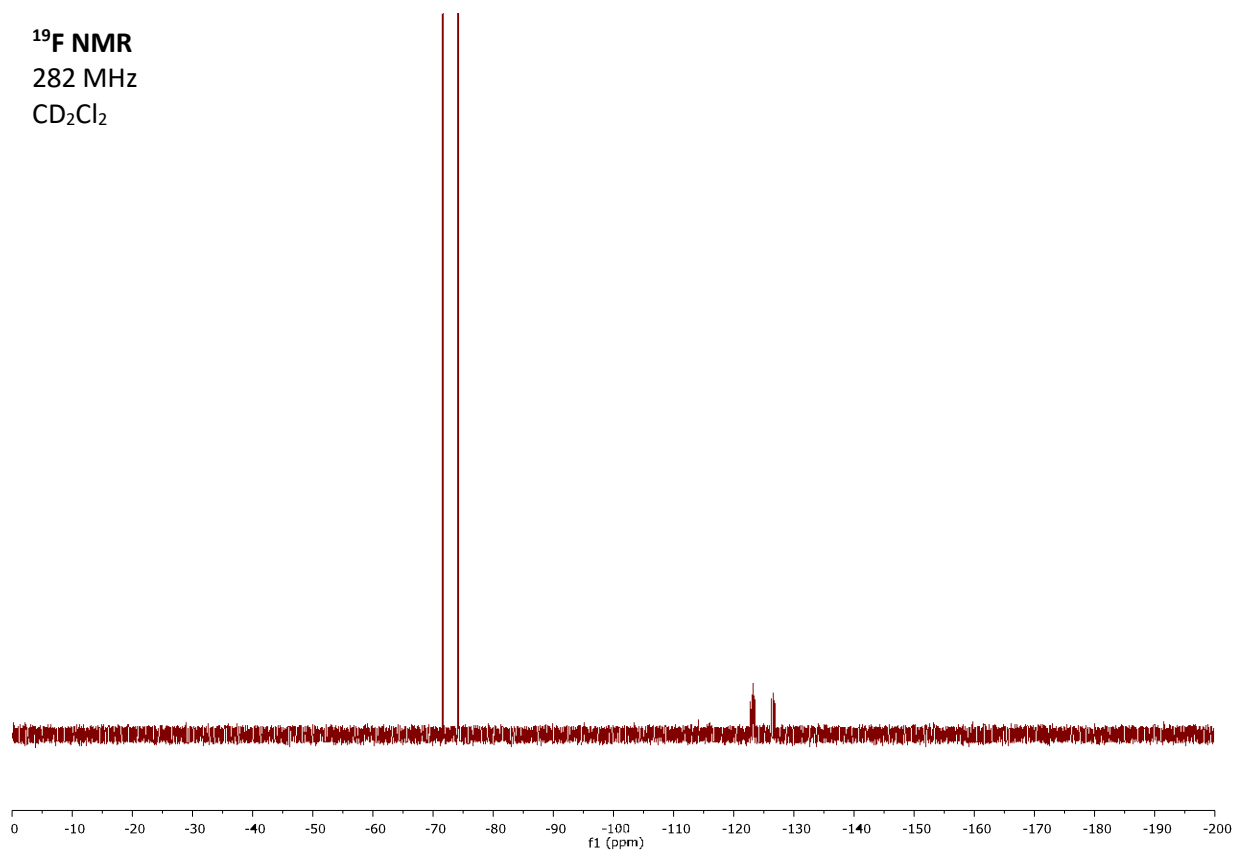

**<sup>1</sup>H NMR**  
400 MHz  
CD<sub>2</sub>Cl<sub>2</sub>

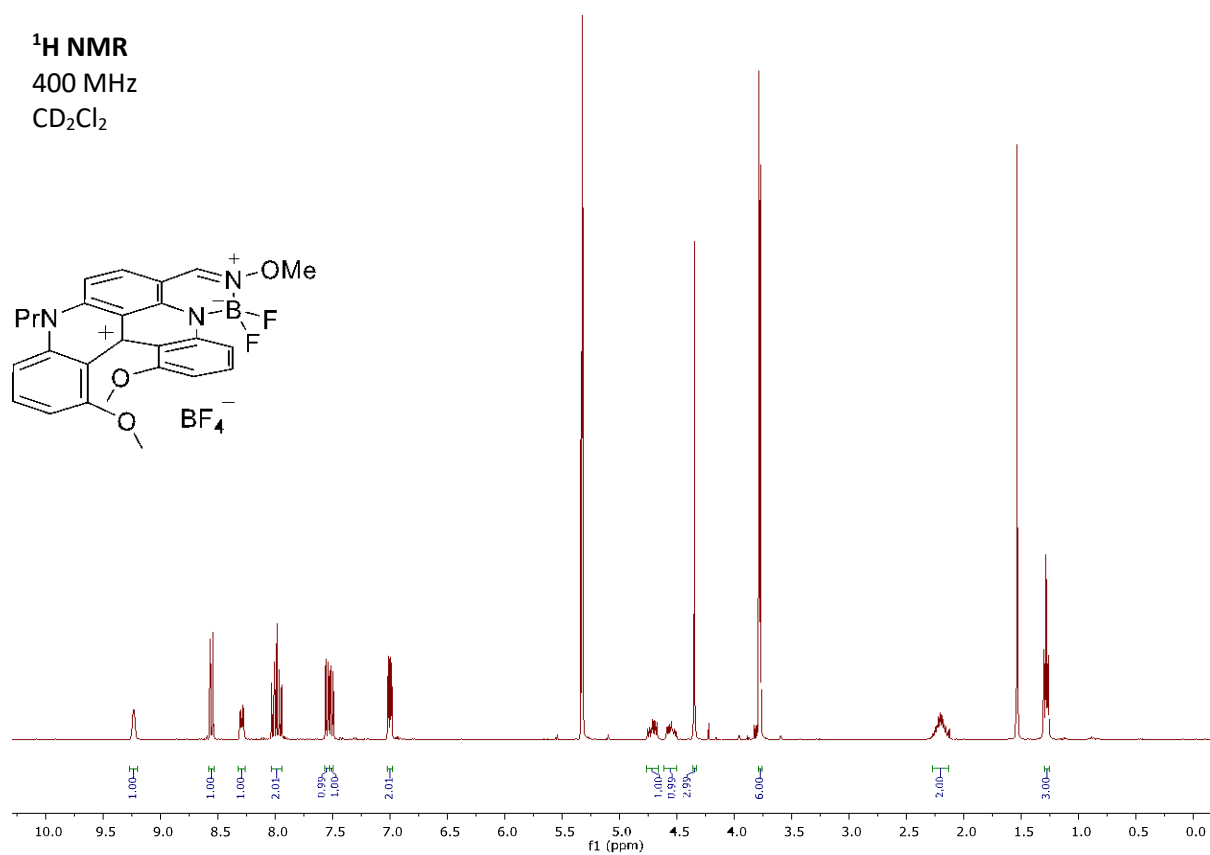

**<sup>13</sup>C NMR**  
101 MHz  
CD<sub>2</sub>Cl<sub>2</sub>

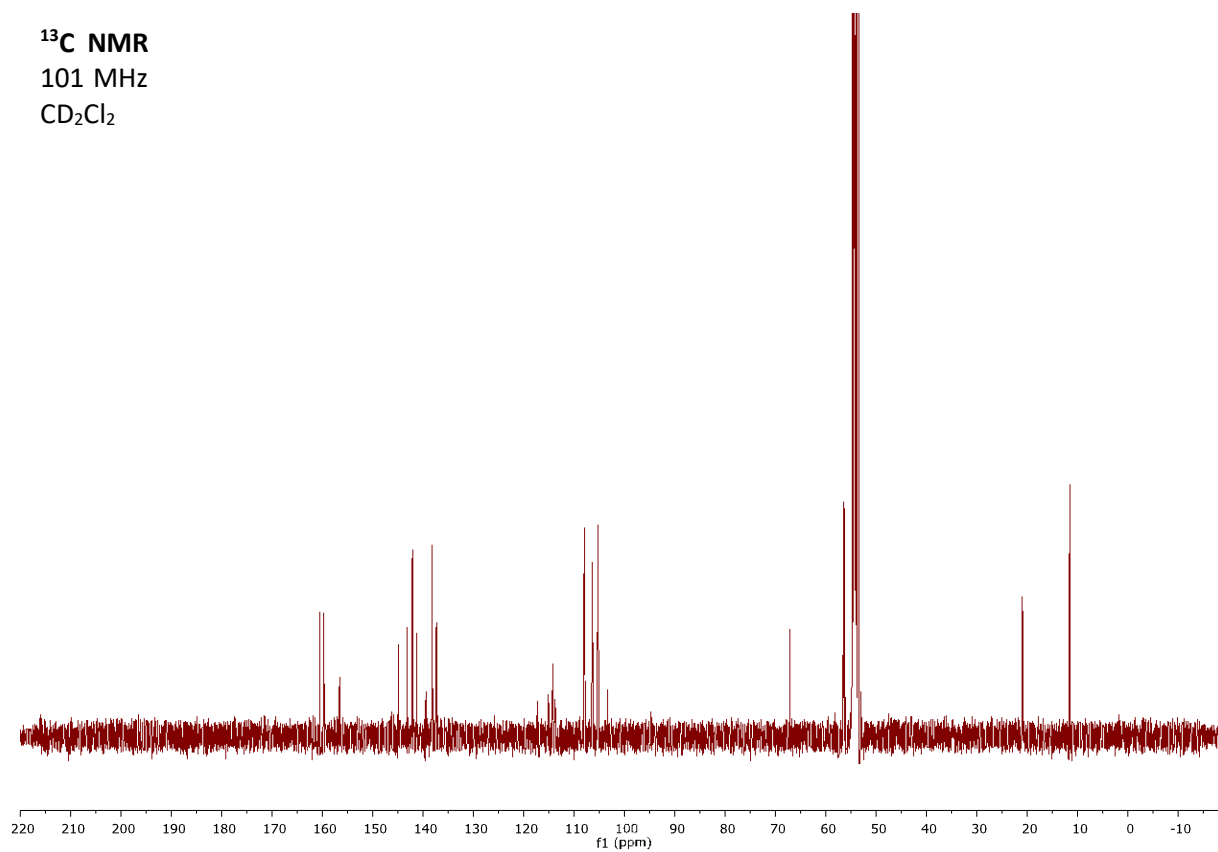

**<sup>19</sup>F NMR**  
282 MHz  
CD<sub>2</sub>Cl<sub>2</sub>

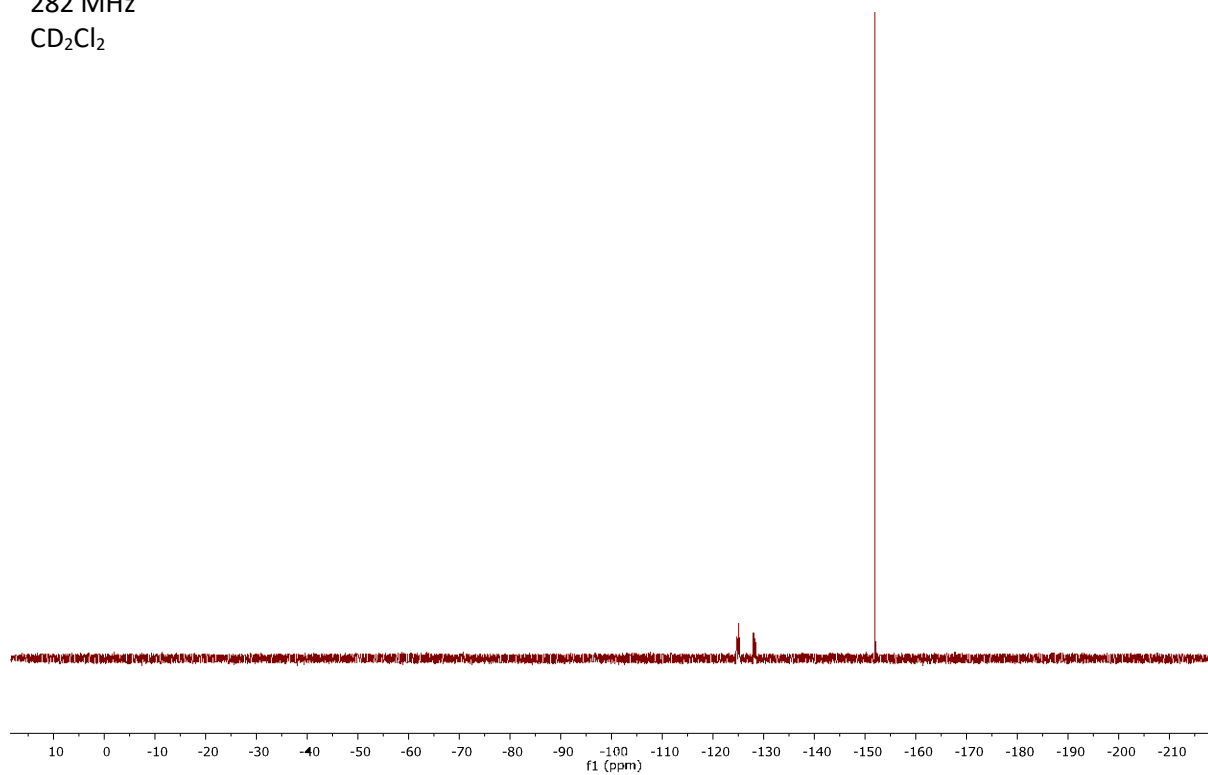

### 3. Optimization of the two-step one-pot procedure

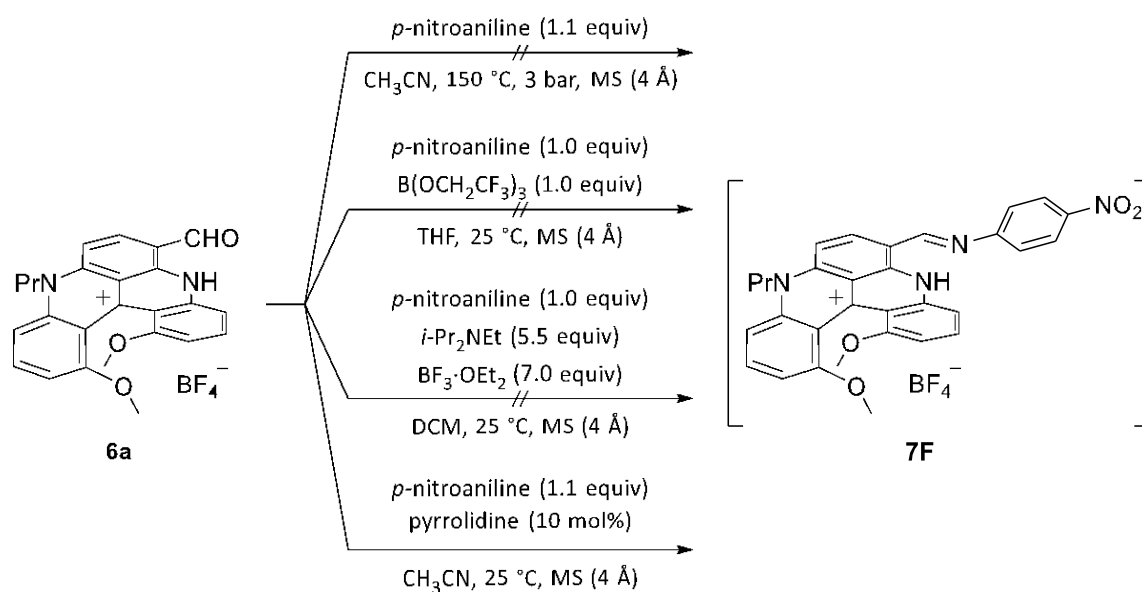

**Scheme S1.** Optimization of the imine formation step with formylated **6a** and *p*-nitroaniline **F**.

Initially, the reaction was attempted at 150 °C under MW irradiation, but no conversion was observed. Other attempts were then conducted in the presence of Lewis acids. For instance, Reeves and co-workers recently reported the use of tris(2,2,2-trifluoroethyl)borate as an effective reagent for promoting the condensation of sulfinamides with all types of aldehydes.<sup>[14]</sup> In our case, nonetheless, these conditions led to a very messy reaction crude in which **7F** could not be detected. Still, with boron-based Lewis acids in mind, we wondered whether boron trifluoride etherate could play a dual role, being the Lewis acid that would favor the first step but also the chelating agent in the second. As discussed, BF<sub>3</sub>·OEt<sub>2</sub> was added altogether with **6a**, *p*-nitroaniline **F** and Hünig's base. Once again, the outcome of the reaction was a very messy reaction crude. Finally, the desired result was obtained by using an organocatalytic method that involves the presence of an iminium ion as a key *in situ* intermediate. Indeed, García Ruano and Cid reported in 2014 the use of pyrrolidine as a catalyst for the synthesis of a large variety of imines.<sup>[15]</sup> To our delight, these conditions turned out to be applicable to our substrates and an instantaneous formation of intermediate **7F** was observed at room temperature.



## 4. (Chir)optical properties

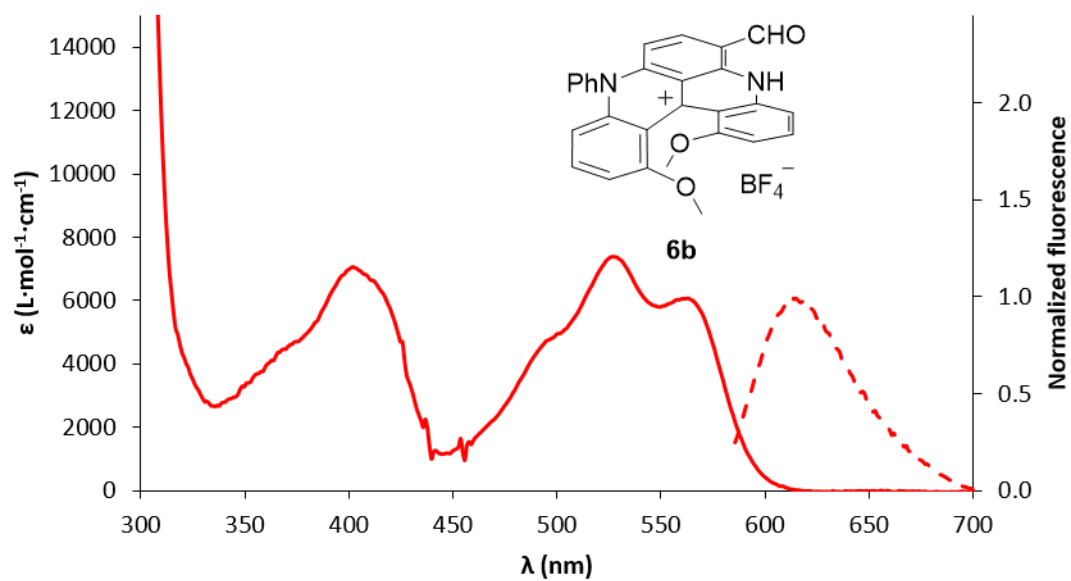

**Figure S1.** Absorption (solid line) and fluorescence (dashed line) of **6b**. Solutions in  $\text{CH}_3\text{CN}$  ( $5 \cdot 10^{-6}$  M).

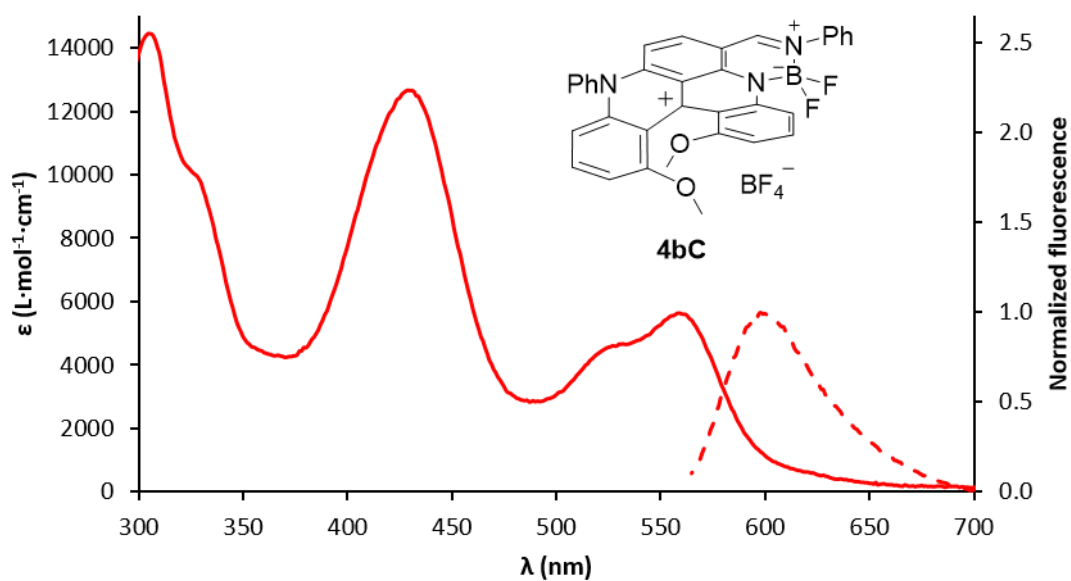

**Figure S2.** Absorption (solid line) and fluorescence (dashed line) of **4bC**. Solutions in  $\text{CH}_3\text{CN}$  ( $1 \cdot 10^{-5}$  M).

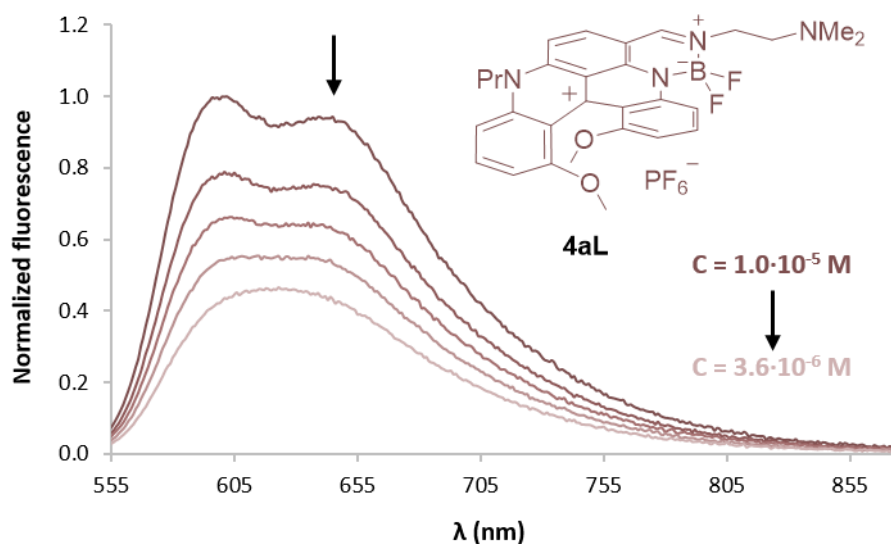

**Figure S3.** Normalized fluorescence spectra of BODIPY **4aL** at various concentrations ( $\text{CH}_3\text{CN}$ ,  $1.0 \cdot 10^{-5} \text{ M}$   $\rightarrow$   $7.6 \cdot 10^{-6} \text{ M}$   $\rightarrow$   $6.1 \cdot 10^{-6} \text{ M}$   $\rightarrow$   $4.7 \cdot 10^{-6} \text{ M}$   $\rightarrow$   $3.6 \cdot 10^{-6} \text{ M}$ ).

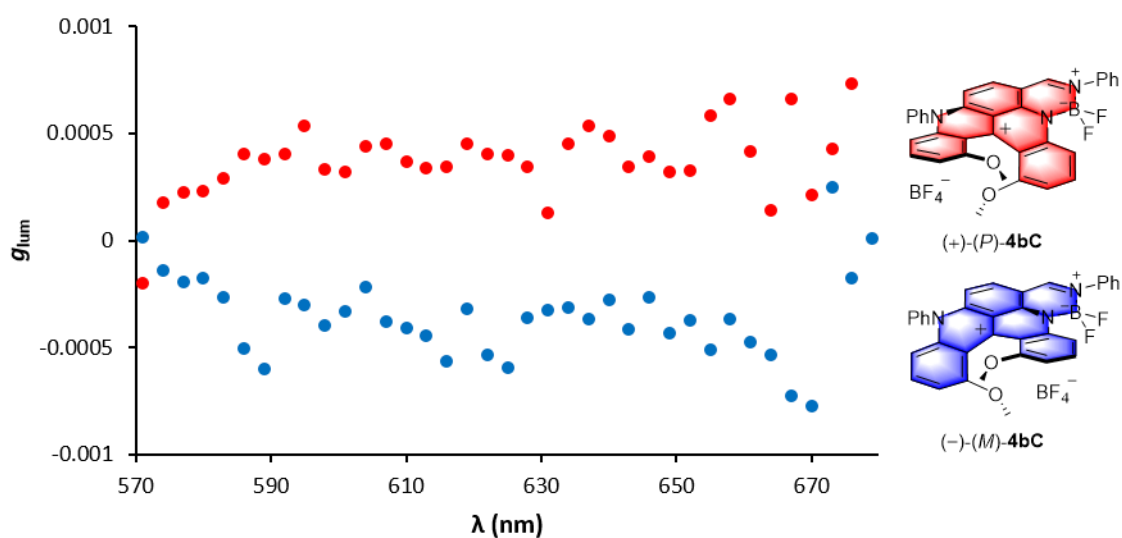

**Figure S4.**  $g_{\text{lum}}$  response of (+)-(P)-**4bC** (red dots) and (-)(M)-**4bC** (blue dots). Average of 6 accumulations. Solutions in  $\text{CH}_3\text{CN}$  ( $6.7 \cdot 10^{-6} \text{ M}$ ).

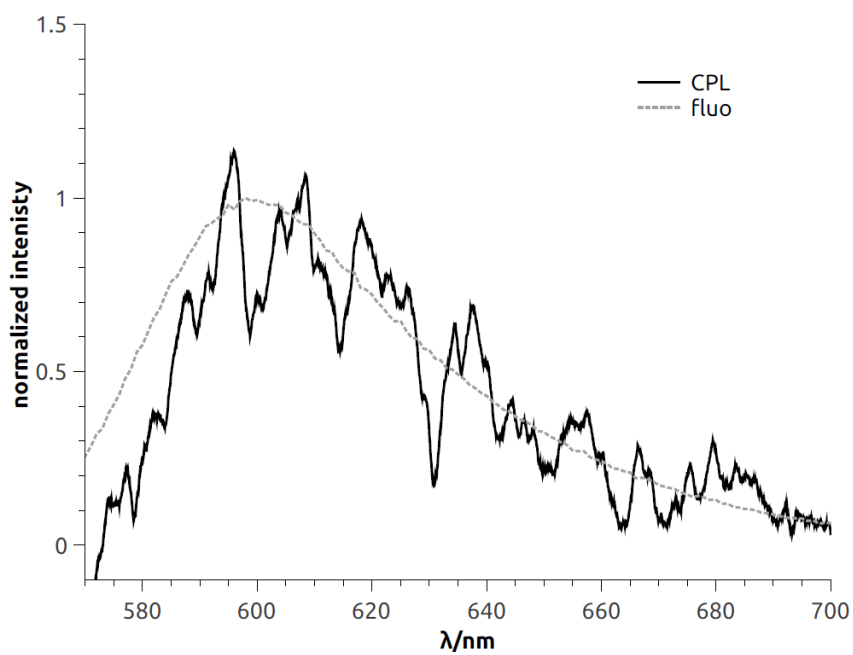

**Figure S5:** comparison between CPL (solid line) of (+)-(P)-**4bC** and fluorescence (dotted line) spectra. The spectra are normalized for an easier visual comparison.

## 5. Electrochemical properties

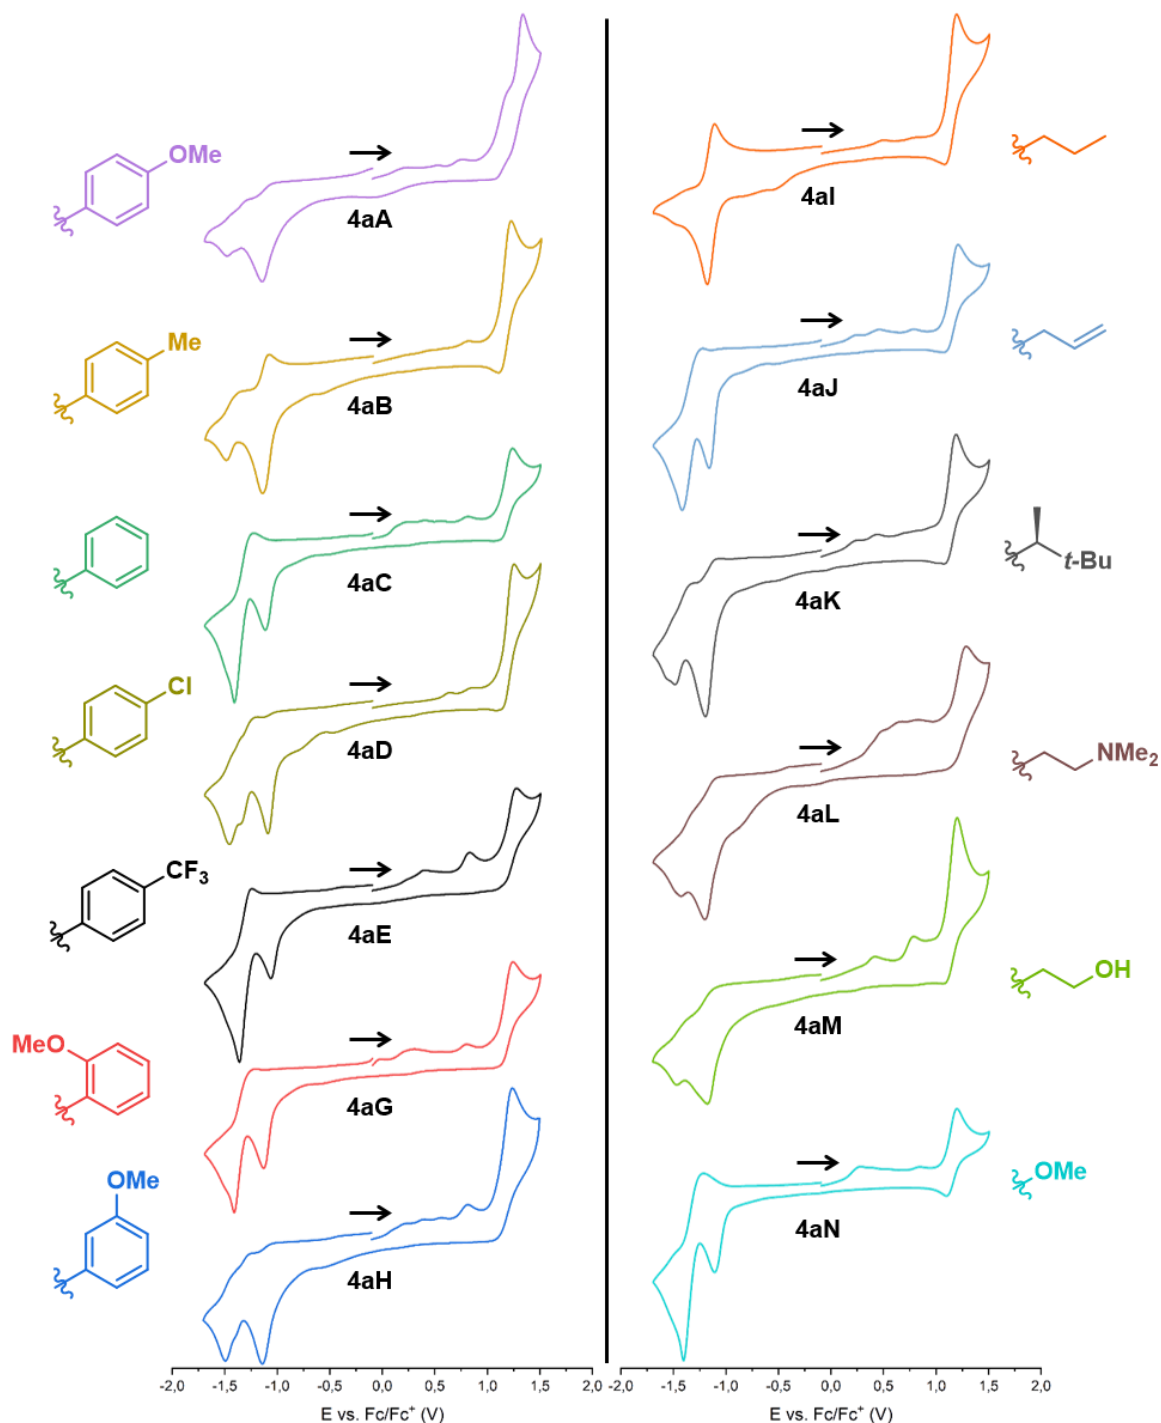

**Figure S6.** Cyclic voltammograms of compounds **4a** in  $CH_3CN$  ( $C = 10^{-3}$  M) recorded vs.  $Fc/Fc^+$  at a Pt working electrode ( $\varnothing = 3$  mm,  $\nu = 0.1$  V $\cdot$ s $^{-1}$ ) and containing  $[TBA][PF_6]$  as supporting electrolyte ( $C = 10^{-1}$  M). The potential was scanned first toward positive values and then toward negative ones. Voltammograms with the ferrocene reference added *in situ* are not represented.

## 6. Computed energies and Cartesian coordinates of compounds 4a

### Compound 4aA

SCF Done: E(RB3LYP) = -1851.781084

Zero-point correction = 0.557006

Enthalpy correction = 0.592814

Gibbs Free Energy correction = 0.490425

|   |           |           |           |
|---|-----------|-----------|-----------|
| O | 3.478919  | -2.506669 | -1.242533 |
| O | 3.483317  | -2.180322 | 1.485133  |
| N | 3.111270  | 2.191096  | -0.342361 |
| C | 1.175974  | 0.756041  | -0.218483 |
| C | 1.744094  | 2.066796  | -0.314310 |
| C | 3.928526  | 1.154915  | 0.109803  |
| C | 5.290619  | 1.381150  | 0.379701  |
| H | 5.750132  | 2.335319  | 0.179619  |
| C | 3.365980  | -0.133841 | 0.325136  |
| C | 0.010525  | -1.774377 | -0.371132 |
| C | -0.242403 | 0.585140  | -0.239834 |
| C | 2.014179  | -0.375168 | -0.115958 |
| C | 5.471572  | -0.831093 | 1.355626  |
| H | 6.067051  | -1.552295 | 1.895580  |
| C | -0.569498 | -3.054827 | -0.488550 |
| H | -1.630847 | -3.186674 | -0.374718 |
| C | 1.433166  | -1.639570 | -0.442240 |
| C | 0.893194  | 3.183503  | -0.424124 |
| H | 1.290542  | 4.182354  | -0.499878 |
| C | 3.715895  | 3.480457  | -0.752804 |
| C | 1.593655  | -3.993728 | -1.074442 |
| H | 2.157348  | -4.847374 | -1.421177 |
| C | 4.140928  | -1.087316 | 1.061546  |
| C | -1.069033 | 1.744219  | -0.256421 |
| C | 2.195942  | -2.762910 | -0.913976 |
| C | -0.470804 | 3.007983  | -0.365252 |
| H | -1.112988 | 3.881293  | -0.396003 |
| C | 6.040431  | 0.385333  | 0.972366  |
| H | 7.084766  | 0.571846  | 1.192941  |
| C | 0.221929  | -4.130766 | -0.812972 |
| H | -0.236844 | -5.106705 | -0.918790 |
| C | 4.269295  | -3.546955 | -1.820348 |
| H | 4.393849  | -4.383410 | -1.126111 |
| H | 5.237446  | -3.096178 | -2.026613 |
| H | 3.824908  | -3.904059 | -2.753558 |

|   |            |           |           |
|---|------------|-----------|-----------|
| C | 4.154650   | -3.131937 | 2.314716  |
| H | 3.410426   | -3.891762 | 2.541116  |
| H | 4.499296   | -2.667188 | 3.242459  |
| H | 4.999039   | -3.588908 | 1.790751  |
| N | -0.793258  | -0.651684 | -0.199526 |
| C | -2.478136  | 1.646499  | -0.135379 |
| N | -3.113821  | 0.519664  | 0.003127  |
| B | -2.371868  | -0.874253 | -0.038599 |
| C | -4.552319  | 0.515972  | 0.043570  |
| C | -5.278326  | 1.275674  | -0.883361 |
| C | -6.659485  | 1.296995  | -0.836826 |
| C | -7.346702  | 0.552392  | 0.134230  |
| C | -6.619694  | -0.218120 | 1.049975  |
| C | -5.229698  | -0.238780 | 0.999718  |
| H | -4.762120  | 1.815761  | -1.668718 |
| H | -7.236134  | 1.863778  | -1.556628 |
| H | -7.122636  | -0.803104 | 1.807200  |
| H | -4.672558  | -0.831833 | 1.710668  |
| F | -2.863972  | -1.549162 | -1.138205 |
| F | -2.581354  | -1.552879 | 1.149805  |
| H | -3.060867  | 2.563250  | -0.132527 |
| C | 3.935768   | 4.481588  | 0.389776  |
| C | 4.554716   | 5.784781  | -0.124451 |
| O | -8.693469  | 0.638235  | 0.093733  |
| H | 3.069812   | 3.906790  | -1.520552 |
| H | 4.656927   | 3.249907  | -1.251358 |
| H | 2.983790   | 4.689486  | 0.886259  |
| H | 4.581160   | 4.034703  | 1.150359  |
| H | 4.710659   | 6.487385  | 0.696013  |
| H | 5.525017   | 5.608427  | -0.597596 |
| H | 3.909830   | 6.273442  | -0.860564 |
| C | -9.465832  | -0.118759 | 1.025590  |
| H | -10.504715 | 0.102995  | 0.792211  |
| H | -9.287001  | -1.191990 | 0.907853  |
| H | -9.252142  | 0.183146  | 2.055665  |

**Compound 4aB**

SCF Done: E(RB3LYP) = -1776.554185

Zero-point correction = 0.551851

Enthalpy correction = 0.586936

Gibbs Free Energy correction = 0.485707

|   |           |           |           |
|---|-----------|-----------|-----------|
| O | 3.206919  | -2.499469 | -1.263258 |
| O | 3.256723  | -2.161705 | 1.462362  |
| N | 2.826583  | 2.200549  | -0.374910 |
| C | 0.902955  | 0.754333  | -0.212961 |
| C | 1.461484  | 2.067882  | -0.324583 |
| C | 3.658060  | 1.170880  | 0.067428  |
| C | 5.022699  | 1.406864  | 0.314281  |
| H | 5.472930  | 2.363160  | 0.103667  |
| C | 3.107215  | -0.120408 | 0.296865  |
| C | -0.249562 | -1.783590 | -0.333841 |
| C | -0.514696 | 0.574967  | -0.209500 |
| C | 1.749554  | -0.371596 | -0.119795 |
| C | 5.233995  | -0.800764 | 1.294565  |
| H | 5.842946  | -1.516363 | 1.826913  |
| C | -0.824795 | -3.067199 | -0.436618 |
| H | -1.883248 | -3.204491 | -0.303252 |
| C | 1.170685  | -1.640824 | -0.430534 |
| C | 0.602166  | 3.179782  | -0.426373 |
| H | 0.992783  | 4.180320  | -0.513252 |
| C | 3.416740  | 3.493131  | -0.797181 |
| C | 1.333017  | -3.996251 | -1.057057 |
| H | 1.895281  | -4.848063 | -1.410598 |
| C | 3.900203  | -1.066473 | 1.023680  |
| C | -1.347933 | 1.730068  | -0.218801 |
| C | 1.931443  | -2.761603 | -0.911476 |
| C | -0.759140 | 2.996997  | -0.344280 |
| H | -1.406970 | 3.866327  | -0.368612 |
| C | 5.788587  | 0.417831  | 0.897939  |
| H | 6.835193  | 0.611776  | 1.100574  |
| C | -0.033092 | -4.139990 | -0.771109 |
| H | -0.488194 | -5.118804 | -0.865480 |
| C | 3.991872  | -3.536353 | -1.854871 |
| H | 4.134685  | -4.370942 | -1.161972 |
| H | 4.953212  | -3.080409 | -2.080667 |
| H | 3.531337  | -3.897304 | -2.778703 |
| C | 3.947667  | -3.105607 | 2.284957  |
| H | 3.212001  | -3.868950 | 2.526847  |
| H | 4.304534  | -2.634440 | 3.204766  |

|   |           |           |           |
|---|-----------|-----------|-----------|
| H | 4.786097  | -3.559583 | 1.749024  |
| N | -1.056896 | -0.664501 | -0.153656 |
| C | -2.753606 | 1.624447  | -0.072066 |
| N | -3.376768 | 0.494251  | 0.086199  |
| B | -2.632224 | -0.896710 | 0.029720  |
| C | -4.816738 | 0.483756  | 0.169086  |
| C | -5.569652 | 1.173855  | -0.781150 |
| C | -6.956907 | 1.185685  | -0.686356 |
| C | -7.617973 | 0.509514  | 0.343505  |
| C | -6.840318 | -0.184529 | 1.278735  |
| C | -5.453831 | -0.209954 | 1.199327  |
| H | -5.078231 | 1.667005  | -1.612097 |
| H | -7.533362 | 1.717263  | -1.435309 |
| H | -7.328295 | -0.714855 | 2.089214  |
| H | -4.867442 | -0.749438 | 1.929293  |
| F | -3.135868 | -1.568132 | -1.066812 |
| F | -2.824019 | -1.579167 | 1.217467  |
| H | -3.344069 | 2.536524  | -0.063968 |
| C | 3.647635  | 4.497149  | 0.340644  |
| C | 4.249676  | 5.803845  | -0.184659 |
| C | -9.123067 | 0.495784  | 0.427612  |
| H | -9.463568 | 0.549162  | 1.464075  |
| H | -9.562314 | 1.331490  | -0.119827 |
| H | -9.525824 | -0.428109 | -0.000486 |
| H | 2.756417  | 3.914046  | -1.555690 |
| H | 4.351380  | 3.267535  | -1.309732 |
| H | 2.702101  | 4.699246  | 0.851657  |
| H | 4.307746  | 4.055476  | 1.091582  |
| H | 4.414574  | 6.508028  | 0.632688  |
| H | 5.213184  | 5.633376  | -0.673558 |
| H | 3.589601  | 6.287763  | -0.910344 |

Compound **4aC**

SCF Done: E(RB3LYP) = -1737.225295

Zero-point correction = 0.524736

Enthalpy correction = 0.557902

Gibbs Free Energy correction = 0.461603

|   |           |           |           |
|---|-----------|-----------|-----------|
| O | 2.877122  | -2.533583 | -1.281988 |
| O | 2.959522  | -2.200106 | 1.443012  |
| N | 2.585305  | 2.171700  | -0.384330 |
| C | 0.639462  | 0.757914  | -0.205968 |
| C | 1.219133  | 2.061894  | -0.321765 |
| C | 3.403642  | 1.127207  | 0.048531  |
| C | 4.774289  | 1.339755  | 0.282414  |
| H | 5.238707  | 2.288603  | 0.068887  |
| C | 2.833213  | -0.154902 | 0.281741  |
| C | -0.557076 | -1.760037 | -0.317620 |
| C | -0.780955 | 0.602711  | -0.188932 |
| C | 1.467681  | -0.382432 | -0.122010 |
| C | 4.957818  | -0.872659 | 1.257616  |
| H | 5.559793  | -1.599293 | 1.782898  |
| C | -1.155012 | -3.033344 | -0.415601 |
| H | -2.214341 | -3.152875 | -0.272298 |
| C | 0.864321  | -1.641273 | -0.428362 |
| C | 0.377786  | 3.188909  | -0.414764 |
| H | 0.784664  | 4.182661  | -0.504682 |
| C | 3.193736  | 3.455315  | -0.808798 |
| C | 0.980356  | -3.998610 | -1.058054 |
| H | 1.524648  | -4.859550 | -1.417565 |
| C | 3.617119  | -1.115392 | 0.999592  |
| C | -1.594272 | 1.772340  | -0.189933 |
| C | 1.601072  | -2.774295 | -0.917799 |
| C | -0.985166 | 3.029564  | -0.320215 |
| H | -1.618342 | 3.909776  | -0.338029 |
| C | 5.528999  | 0.336993  | 0.857284  |
| H | 6.580645  | 0.512962  | 1.049926  |
| C | -0.384944 | -4.119328 | -0.758539 |
| H | -0.857650 | -5.090133 | -0.848926 |
| C | 3.639397  | -3.583766 | -1.880036 |
| H | 3.773417  | -4.420626 | -1.188167 |
| H | 4.606507  | -3.144274 | -2.113622 |
| H | 3.165256  | -3.936575 | -2.800090 |
| C | 3.641856  | -3.156537 | 2.258540  |
| H | 2.895125  | -3.906677 | 2.507673  |
| H | 4.016251  | -2.692082 | 3.174760  |

|   |           |           |           |
|---|-----------|-----------|-----------|
| H | 4.466573  | -3.625225 | 1.714061  |
| N | -1.343608 | -0.627242 | -0.128925 |
| C | -2.999592 | 1.690472  | -0.032074 |
| N | -3.639649 | 0.570517  | 0.132116  |
| B | -2.920454 | -0.833331 | 0.070519  |
| C | -5.079896 | 0.585881  | 0.230830  |
| C | -5.826140 | 1.269220  | -0.731191 |
| C | -7.212998 | 1.306792  | -0.624963 |
| C | -7.850483 | 0.659898  | 0.431105  |
| C | -7.097911 | -0.031964 | 1.378319  |
| C | -5.710559 | -0.078645 | 1.283668  |
| H | -5.329383 | 1.732820  | -1.575611 |
| H | -7.793578 | 1.828095  | -1.376543 |
| H | -7.591142 | -0.538991 | 2.198922  |
| H | -5.120101 | -0.614299 | 2.013057  |
| F | -3.447407 | -1.496856 | -1.019762 |
| F | -3.112821 | -1.509930 | 1.261234  |
| H | -3.575109 | 2.612123  | -0.020385 |
| C | 3.452643  | 4.451134  | 0.330137  |
| C | 4.071898  | 5.749344  | -0.196115 |
| H | 2.533801  | 3.889682  | -1.559957 |
| H | 4.119406  | 3.214981  | -1.330814 |
| H | 2.515684  | 4.667292  | 0.851103  |
| H | 4.112414  | 3.995283  | 1.072897  |
| H | 4.256183  | 6.447552  | 0.622205  |
| H | 5.027912  | 5.564433  | -0.694373 |
| H | 3.413568  | 6.247169  | -0.913932 |
| H | -8.930602 | 0.686633  | 0.510318  |

Compound **4aD**

SCF Done: E(RB3LYP) = -1751.623099

Zero-point correction = 0.515133

Enthalpy correction = 0.549537

Gibbs Free Energy correction = 0.449944

|   |           |           |           |
|---|-----------|-----------|-----------|
| O | 3.498514  | -2.480143 | -1.249434 |
| O | 3.527635  | -2.139688 | 1.475864  |
| N | 3.065514  | 2.217069  | -0.367895 |
| C | 1.155935  | 0.752206  | -0.217519 |
| C | 1.702595  | 2.070748  | -0.327521 |
| C | 3.904550  | 1.195829  | 0.081014  |
| C | 5.264724  | 1.445996  | 0.336722  |
| H | 5.706755  | 2.406572  | 0.128443  |
| C | 3.364922  | -0.100761 | 0.307983  |
| C | 0.029490  | -1.797554 | -0.343927 |
| C | -0.259809 | 0.559199  | -0.223250 |
| C | 2.012971  | -0.365597 | -0.117383 |
| C | 5.491889  | -0.758828 | 1.319954  |
| H | 6.104704  | -1.467853 | 1.856659  |
| C | -0.532971 | -3.085924 | -0.450339 |
| H | -1.590932 | -3.233855 | -0.324444 |
| C | 1.448733  | -1.640752 | -0.431020 |
| C | 0.833111  | 3.175473  | -0.437146 |
| H | 1.215630  | 4.179200  | -0.522674 |
| C | 3.646478  | 3.515027  | -0.788631 |
| C | 1.637695  | -3.994673 | -1.055553 |
| H | 2.210547  | -4.841256 | -1.404607 |
| C | 4.162673  | -1.038576 | 1.040658  |
| C | -1.103905 | 1.707305  | -0.239617 |
| C | 2.223635  | -2.754179 | -0.906410 |
| C | -0.525781 | 2.980685  | -0.363509 |
| H | -1.181566 | 3.843848  | -0.393297 |
| C | 6.036683  | 0.465014  | 0.926206  |
| H | 7.079887  | 0.669656  | 1.135657  |
| C | 0.271419  | -4.151483 | -0.779129 |
| H | -0.173674 | -5.134584 | -0.876360 |
| C | 4.297253  | -3.509192 | -1.837383 |
| H | 4.444602  | -4.342421 | -1.143908 |
| H | 5.255068  | -3.043394 | -2.057778 |
| H | 3.845147  | -3.874058 | -2.763758 |
| C | 4.222564  | -3.075857 | 2.304627  |
| H | 3.493043  | -3.846419 | 2.542048  |
| H | 4.567800  | -2.599880 | 3.226325  |

|    |           |           |           |
|----|-----------|-----------|-----------|
| H  | 5.069308  | -3.521526 | 1.774977  |
| N  | -0.790072 | -0.685206 | -0.170089 |
| C  | -2.507480 | 1.589157  | -0.103043 |
| N  | -3.120449 | 0.451484  | 0.052611  |
| B  | -2.362214 | -0.933116 | 0.000812  |
| C  | -4.559233 | 0.424575  | 0.126368  |
| C  | -5.313409 | 1.091279  | -0.840689 |
| C  | -6.701369 | 1.088549  | -0.765070 |
| C  | -7.324277 | 0.409693  | 0.277283  |
| C  | -6.579156 | -0.271120 | 1.236050  |
| C  | -5.191600 | -0.268792 | 1.159776  |
| H  | -4.823293 | 1.580002  | -1.674410 |
| H  | -7.293785 | 1.593322  | -1.516428 |
| H  | -7.080319 | -0.796924 | 2.037766  |
| H  | -4.602610 | -0.794775 | 1.897277  |
| F  | -2.854793 | -1.607122 | -1.099095 |
| F  | -2.560706 | -1.616577 | 1.187128  |
| H  | -3.106821 | 2.495579  | -0.100591 |
| C  | 3.859800  | 4.523627  | 0.348543  |
| C  | 4.454175  | 5.834211  | -0.175964 |
| H  | 2.987720  | 3.927932  | -1.552809 |
| H  | 4.586612  | 3.296788  | -1.294124 |
| H  | 2.908657  | 4.718832  | 0.851819  |
| H  | 4.518023  | 4.089929  | 1.105701  |
| H  | 4.605361  | 6.542355  | 0.640560  |
| H  | 5.423402  | 5.671219  | -0.655941 |
| H  | 3.795869  | 6.309651  | -0.908792 |
| Cl | -9.073091 | 0.402027  | 0.377060  |



Compound **4aE**

SCF Done: E(RB3LYP) = -2074.359294

Zero-point correction = 0.529218

Enthalpy correction = 0.566083

Gibbs Free Energy correction = 0.459467

|   |           |           |           |
|---|-----------|-----------|-----------|
| O | 4.045949  | -2.449145 | -1.221929 |
| O | 4.036821  | -2.101493 | 1.502494  |
| N | 3.527324  | 2.242857  | -0.358131 |
| C | 1.639957  | 0.748379  | -0.226740 |
| C | 2.167121  | 2.075014  | -0.333627 |
| C | 4.377296  | 1.235907  | 0.103037  |
| C | 5.730158  | 1.508263  | 0.373554  |
| H | 6.159465  | 2.475076  | 0.167682  |
| C | 3.855555  | -0.068495 | 0.327134  |
| C | 0.555585  | -1.819216 | -0.362041 |
| C | 0.227590  | 0.533124  | -0.249203 |
| C | 2.513279  | -0.355674 | -0.113639 |
| C | 5.980833  | -0.690340 | 1.365054  |
| H | 6.598696  | -1.388242 | 1.910486  |
| C | 0.014192  | -3.115850 | -0.474095 |
| H | -1.042881 | -3.280027 | -0.361458 |
| C | 1.973128  | -1.640246 | -0.431353 |
| C | 1.281757  | 3.166494  | -0.456120 |
| H | 1.650252  | 4.175642  | -0.539084 |
| C | 4.093145  | 3.548386  | -0.777292 |
| C | 2.206251  | -3.991793 | -1.049626 |
| H | 2.796614  | -4.829933 | -1.389727 |
| C | 4.659429  | -0.991883 | 1.071478  |
| C | -0.633989 | 1.668526  | -0.277827 |
| C | 2.771259  | -2.742181 | -0.894945 |
| C | -0.074127 | 2.951097  | -0.397790 |
| H | -0.742934 | 3.803828  | -0.436956 |
| C | 6.510708  | 0.540918  | 0.974293  |
| H | 7.548107  | 0.762485  | 1.195028  |
| C | 0.839190  | -4.169405 | -0.790942 |
| H | 0.410653  | -5.159381 | -0.892556 |
| C | 4.867497  | -3.466089 | -1.800000 |
| H | 5.020801  | -4.295871 | -1.103729 |
| H | 5.819942  | -2.985120 | -2.010769 |
| H | 4.431082  | -3.839242 | -2.730544 |
| C | 4.737429  | -3.025448 | 2.340464  |
| H | 4.017678  | -3.807196 | 2.570960  |
| H | 5.064696  | -2.542649 | 3.265130  |

|   |           |           |           |
|---|-----------|-----------|-----------|
| H | 5.596922  | -3.458132 | 1.820771  |
| N | -0.283483 | -0.719064 | -0.200668 |
| C | -2.036067 | 1.528930  | -0.158612 |
| N | -2.632464 | 0.381386  | -0.007251 |
| B | -1.853268 | -0.992128 | -0.051453 |
| C | -4.071821 | 0.333888  | 0.053680  |
| C | -4.823510 | 0.974263  | -0.932458 |
| C | -6.211524 | 0.950383  | -0.865792 |
| C | -6.843759 | 0.279799  | 0.178810  |
| C | -6.088234 | -0.374648 | 1.151355  |
| C | -4.700445 | -0.355189 | 1.091953  |
| H | -4.329233 | 1.454403  | -1.768458 |
| H | -6.800087 | 1.432111  | -1.635539 |
| H | -6.584389 | -0.905292 | 1.953748  |
| H | -4.108039 | -0.863371 | 1.838860  |
| F | -2.321635 | -1.669556 | -1.159689 |
| F | -2.058321 | -1.681143 | 1.130040  |
| H | -2.649981 | 2.425595  | -0.165791 |
| C | 4.278505  | 4.564819  | 0.357812  |
| C | 4.859860  | 5.881479  | -0.166231 |
| H | 3.436757  | 3.948320  | -1.550318 |
| H | 5.041919  | 3.342261  | -1.271571 |
| H | 3.318734  | 4.748668  | 0.848891  |
| H | 4.933886  | 4.144446  | 1.124819  |
| H | 4.989935  | 6.595950  | 0.648386  |
| H | 5.837438  | 5.730659  | -0.633010 |
| H | 4.203847  | 6.343141  | -0.909822 |
| C | -8.348425 | 0.295195  | 0.285257  |
| F | -8.934213 | 0.459628  | -0.916698 |
| F | -8.822186 | -0.846632 | 0.819882  |
| F | -8.768340 | 1.307807  | 1.074950  |

Compound **4aG**

SCF Done: E(RB3LYP) = -1851.779712

Zero-point correction = 0.557200

Enthalpy correction = 0.592977

Gibbs Free Energy correction = 0.491066

|   |           |           |           |
|---|-----------|-----------|-----------|
| O | -3.262592 | -2.375393 | 1.441324  |
| O | -3.485080 | -2.175889 | -1.287847 |
| N | -2.753032 | 2.251665  | 0.281087  |
| C | -0.904592 | 0.716259  | 0.069315  |
| C | -1.400537 | 2.057283  | 0.147931  |
| C | -3.653060 | 1.239116  | -0.052824 |
| C | -5.020119 | 1.523155  | -0.223810 |
| H | -5.415162 | 2.508434  | -0.037783 |
| C | -3.172533 | -0.085346 | -0.247519 |
| C | 0.150181  | -1.859479 | 0.254420  |
| C | 0.501684  | 0.475186  | -0.013385 |
| C | -1.800459 | -0.374633 | 0.092190  |
| C | -5.388398 | -0.720647 | -1.065103 |
| H | -6.061345 | -1.434577 | -1.516475 |
| C | 0.680027  | -3.159828 | 0.390340  |
| H | 1.720572  | -3.348397 | 0.193561  |
| C | -1.253850 | -1.650364 | 0.433168  |
| C | -0.492406 | 3.133553  | 0.136592  |
| H | -0.835688 | 4.153321  | 0.195804  |
| C | -3.260785 | 3.585288  | 0.680327  |
| C | -1.467470 | -3.960622 | 1.197240  |
| H | -2.038559 | -4.767705 | 1.632204  |
| C | -4.051128 | -1.031218 | -0.868175 |
| C | 1.379869  | 1.591475  | -0.117647 |
| C | -2.024665 | -2.710775 | 1.022742  |
| C | 0.852730  | 2.886912  | -0.021536 |
| H | 1.536095  | 3.726616  | -0.083125 |
| C | -5.864015 | 0.540725  | -0.701166 |
| H | -6.912917 | 0.770883  | -0.845759 |
| C | -0.129787 | -4.178327 | 0.832792  |
| H | 0.290869  | -5.169874 | 0.951199  |
| C | -4.049058 | -3.346025 | 2.133971  |
| H | -4.270717 | -4.206511 | 1.495621  |
| H | -4.974313 | -2.837572 | 2.395674  |
| H | -3.544898 | -3.681422 | 3.044621  |
| C | -4.273404 | -3.131892 | -2.001321 |
| H | -3.590200 | -3.940211 | -2.250902 |
| H | -4.678925 | -2.697123 | -2.918916 |

|   |           |           |           |
|---|-----------|-----------|-----------|
| H | -5.087201 | -3.516214 | -1.379669 |
| N | 0.988214  | -0.787854 | -0.034902 |
| C | 2.768569  | 1.418822  | -0.345687 |
| N | 3.328201  | 0.255023  | -0.485596 |
| B | 2.543506  | -1.094546 | -0.275598 |
| C | 4.755702  | 0.162326  | -0.664093 |
| C | 5.618344  | 0.757935  | 0.280009  |
| C | 6.997032  | 0.618815  | 0.113312  |
| C | 7.504339  | -0.092691 | -0.972034 |
| C | 6.650289  | -0.677835 | -1.899771 |
| C | 5.273722  | -0.554829 | -1.738614 |
| O | 5.031000  | 1.439391  | 1.300624  |
| H | 7.046803  | -1.231132 | -2.741454 |
| H | 4.589552  | -1.017924 | -2.435602 |
| F | 3.074027  | -1.699334 | 0.846943  |
| F | 2.652620  | -1.877817 | -1.411503 |
| H | 3.393074  | 2.301574  | -0.427856 |
| C | -3.531821 | 4.547875  | -0.484359 |
| C | -4.050630 | 5.897587  | 0.020481  |
| H | -2.532959 | 4.011162  | 1.371379  |
| H | -4.165640 | 3.422640  | 1.265315  |
| H | -2.616403 | 4.691459  | -1.065167 |
| H | -4.256354 | 4.100207  | -1.169629 |
| H | -4.244995 | 6.572882  | -0.814567 |
| H | -4.984525 | 5.784382  | 0.578567  |
| H | -3.326760 | 6.385798  | 0.679421  |
| H | 8.577867  | -0.186445 | -1.085313 |
| H | 7.678574  | 1.061072  | 0.826596  |
| C | 5.846016  | 1.889576  | 2.384638  |
| H | 5.157903  | 2.317187  | 3.110914  |
| H | 6.386597  | 1.055831  | 2.841024  |
| H | 6.553265  | 2.657780  | 2.057894  |

Compound **4aH**

SCF Done: E(RB3LYP) = -1851.780351

Zero-point correction = 0.557101

Enthalpy correction = 0.592838

Gibbs Free Energy correction = 0.491025

|   |           |           |           |
|---|-----------|-----------|-----------|
| O | 3.507628  | -2.315866 | -1.418962 |
| O | 3.706469  | -2.052730 | 1.307080  |
| N | 2.860037  | 2.318807  | -0.359291 |
| C | 1.054703  | 0.735894  | -0.128919 |
| C | 1.513197  | 2.088392  | -0.232245 |
| C | 3.786174  | 1.339462  | 0.001769  |
| C | 5.143165  | 1.665942  | 0.176326  |
| H | 5.512125  | 2.657845  | -0.027234 |
| C | 3.341950  | 0.006029  | 0.220807  |
| C | 0.075058  | -1.873246 | -0.260226 |
| C | -0.344717 | 0.456591  | -0.052075 |
| C | 1.981367  | -0.329216 | -0.121825 |
| C | 5.569082  | -0.549090 | 1.065499  |
| H | 6.258996  | -1.234276 | 1.535397  |
| C | -0.413657 | -3.192587 | -0.361554 |
| H | -1.448656 | -3.408786 | -0.163953 |
| C | 1.473489  | -1.627124 | -0.437280 |
| C | 0.574954  | 3.139318  | -0.249709 |
| H | 0.890389  | 4.166844  | -0.326564 |
| C | 3.332647  | 3.657680  | -0.784670 |
| C | 1.760208  | -3.948304 | -1.141373 |
| H | 2.357257  | -4.748408 | -1.553741 |
| C | 4.242588  | -0.901619 | 0.866657  |
| C | -1.254877 | 1.549971  | 0.018690  |
| C | 2.278554  | -2.678010 | -0.997164 |
| C | -0.763401 | 2.858559  | -0.098435 |
| H | -1.470396 | 3.679958  | -0.060339 |
| C | 6.011144  | 0.717774  | 0.679160  |
| H | 7.052012  | 0.980685  | 0.825886  |
| C | 0.428895  | -4.197261 | -0.774253 |
| H | 0.039160  | -5.204052 | -0.866873 |
| C | 4.323829  | -3.277571 | -2.089909 |
| H | 4.568997  | -4.117813 | -1.433506 |
| H | 5.234428  | -2.747857 | -2.360593 |
| H | 3.831451  | -3.646140 | -2.994116 |
| C | 4.515953  | -2.968921 | 2.048909  |
| H | 3.854094  | -3.790627 | 2.311838  |
| H | 4.900872  | -2.501224 | 2.959111  |

|   |           |           |           |
|---|-----------|-----------|-----------|
| H | 5.345710  | -3.343788 | 1.442853  |
| N | -0.796059 | -0.818798 | -0.004347 |
| C | -2.640338 | 1.341869  | 0.229871  |
| N | -3.175647 | 0.166827  | 0.380451  |
| B | -2.342024 | -1.166867 | 0.245236  |
| C | -4.607649 | 0.056350  | 0.533803  |
| C | -5.432077 | 0.726832  | -0.361869 |
| C | -6.823315 | 0.657037  | -0.215433 |
| C | -7.368952 | -0.095094 | 0.829406  |
| C | -6.519788 | -0.768158 | 1.707376  |
| C | -5.138608 | -0.709430 | 1.575304  |
| H | -5.030421 | 1.273467  | -1.205833 |
| O | -7.537935 | 1.341464  | -1.140330 |
| H | -6.950089 | -1.349586 | 2.514057  |
| H | -4.484917 | -1.231741 | 2.257338  |
| F | -2.847717 | -1.838905 | -0.849190 |
| F | -2.427957 | -1.895377 | 1.417427  |
| H | -3.292119 | 2.208813  | 0.293075  |
| C | 3.565613  | 4.653915  | 0.359623  |
| C | 4.048751  | 6.006510  | -0.172353 |
| H | 2.598932  | 4.046363  | -1.491229 |
| H | 4.246737  | 3.507914  | -1.358531 |
| H | 2.641628  | 4.784023  | 0.929969  |
| H | 4.297093  | 4.243836  | 1.060787  |
| H | 4.215561  | 6.706227  | 0.648410  |
| H | 4.990504  | 5.908504  | -0.719964 |
| H | 3.316607  | 6.457661  | -0.848321 |
| H | -8.439393 | -0.169330 | 0.960933  |
| C | -8.963074 | 1.289620  | -1.084193 |
| H | -9.310988 | 1.891160  | -1.921088 |
| H | -9.327347 | 0.263820  | -1.197256 |
| H | -9.339873 | 1.715896  | -0.149093 |

**Compound 4aI**

SCF Done: E(RB3LYP) = -1624.097439

Zero-point correction = 0.529102

Enthalpy correction = 0.561905

Gibbs Free Energy correction = 0.466630

|   |           |           |           |
|---|-----------|-----------|-----------|
| O | 2.291815  | -2.700949 | -1.144730 |
| O | 2.249069  | -2.278754 | 1.566648  |
| N | 2.304341  | 2.040996  | -0.417315 |
| C | 0.250372  | 0.781566  | -0.302961 |
| C | 0.931844  | 2.034532  | -0.429365 |
| C | 3.016036  | 0.956371  | 0.096547  |
| C | 4.384157  | 1.075470  | 0.400794  |
| H | 4.930057  | 1.979389  | 0.185269  |
| C | 2.339259  | -0.271591 | 0.337861  |
| C | -1.123222 | -1.644918 | -0.406717 |
| C | -1.176592 | 0.732071  | -0.359002 |
| C | 0.984893  | -0.412875 | -0.135627 |
| C | 4.349194  | -1.110142 | 1.450864  |
| H | 4.866797  | -1.860025 | 2.030528  |
| C | -1.810333 | -2.871946 | -0.508497 |
| H | -2.882058 | -2.907081 | -0.422054 |
| C | 0.306650  | -1.634495 | -0.438223 |
| C | 0.184287  | 3.215219  | -0.608769 |
| H | 0.668864  | 4.172334  | -0.710592 |
| C | 3.031139  | 3.257943  | -0.851410 |
| C | 0.278383  | -4.011831 | -0.999780 |
| H | 0.775506  | -4.920989 | -1.304780 |
| C | 3.009431  | -1.261790 | 1.127211  |
| C | -1.897285 | 1.957892  | -0.439692 |
| C | 0.981758  | -2.833804 | -0.852779 |
| C | -1.190660 | 3.159733  | -0.583776 |
| H | -1.753741 | 4.082905  | -0.666838 |
| C | 5.029619  | 0.040349  | 1.046703  |
| H | 6.079726  | 0.145465  | 1.292207  |
| C | -1.107142 | -4.021807 | -0.779505 |
| H | -1.646316 | -4.956876 | -0.874505 |
| C | 3.006762  | -3.824571 | -1.662258 |
| H | 3.029049  | -4.646910 | -0.941049 |
| H | 4.018573  | -3.467904 | -1.841215 |
| H | 2.567681  | -4.168942 | -2.602671 |
| C | 2.819366  | -3.264711 | 2.431337  |
| H | 2.008104  | -3.952210 | 2.658423  |
| H | 3.185020  | -2.809442 | 3.355670  |

|   |           |           |           |
|---|-----------|-----------|-----------|
| H | 3.630952  | -3.803959 | 1.934603  |
| N | -1.831776 | -0.452442 | -0.294006 |
| C | -3.314283 | 1.978468  | -0.346956 |
| N | -4.029662 | 0.913637  | -0.185968 |
| B | -3.425204 | -0.531126 | -0.204722 |
| C | -5.500013 | 1.011078  | -0.045479 |
| F | -3.929819 | -1.158031 | -1.334151 |
| F | -3.777994 | -1.188280 | 0.961105  |
| H | -3.822111 | 2.939946  | -0.395405 |
| C | 3.303925  | 4.275347  | 0.264859  |
| C | 4.069290  | 5.491728  | -0.264414 |
| H | 2.447971  | 3.710363  | -1.653698 |
| H | 3.962563  | 2.928974  | -1.311346 |
| H | 2.358481  | 4.593791  | 0.712906  |
| H | 3.871154  | 3.796099  | 1.067032  |
| H | 4.256014  | 6.208021  | 0.537598  |
| H | 5.038203  | 5.204819  | -0.683011 |
| H | 3.509423  | 6.010978  | -1.047711 |
| C | -5.949373 | 1.080152  | 1.419599  |
| H | -5.835672 | 1.895538  | -0.594203 |
| H | -5.921940 | 0.134478  | -0.538155 |
| C | -7.474816 | 1.141111  | 1.533002  |
| H | -5.562082 | 0.207182  | 1.947943  |
| H | -5.503322 | 1.964666  | 1.888403  |
| H | -7.778912 | 1.198969  | 2.579904  |
| H | -7.883633 | 2.016696  | 1.020086  |
| H | -7.941283 | 0.251161  | 1.101953  |

Compound 4aJ

SCF Done: E(RB3LYP) = -1622.855966

Zero-point correction = 0.505436

Enthalpy correction = 0.537689

Gibbs Free Energy correction = 0.443332

O 2.039180 -2.788196 -1.176828  
O 2.032767 -2.394213 1.538423  
N 2.355318 1.934649 -0.400551  
C 0.225682 0.807749 -0.289911  
C 0.985467 2.015787 -0.406049  
C 2.998439 0.801406 0.098989  
C 4.372225 0.830345 0.398992  
H 4.973159 1.700436 0.191666  
C 2.245479 -0.383359 0.330132  
C -1.300251 -1.524129 -0.420935  
C -1.201708 0.850061 -0.342134  
C 0.882919 -0.433141 -0.138956  
C 4.202142 -1.359906 1.425285  
H 4.672843 -2.147885 1.994328  
C -2.065646 -2.702388 -0.540279  
H -3.137393 -2.669577 -0.452625  
C 0.127423 -1.605280 -0.453653  
C 0.314820 3.244009 -0.570280  
H 0.860337 4.168554 -0.663963  
C 3.156199 3.106594 -0.828564  
C -0.054688 -3.968129 -1.047291  
H 0.382285 -4.903231 -1.365503  
C 2.854112 -1.422505 1.106004  
C -1.842598 2.121050 -0.406866  
C 0.723610 -2.840353 -0.884581  
C -1.060539 3.276761 -0.540726  
H -1.563315 4.235029 -0.612194  
C 4.953065 -0.250783 1.030798  
H 6.008587 -0.215321 1.272997  
C -1.438246 -3.891359 -0.827430  
H -2.036634 -4.788179 -0.935708  
C 2.682131 -3.950103 -1.704061  
H 2.652429 -4.778265 -0.989804  
H 3.714450 -3.656145 -1.879952  
H 2.222691 -4.258125 -2.647346  
C 2.542727 -3.417773 2.397364  
H 1.690105 -4.052100 2.627624  
H 2.942372 -2.989497 3.320493

H 3.314999 -4.006785 1.894479  
N -1.930687 -0.290483 -0.291099  
C -3.254540 2.231659 -0.309581  
N -4.035410 1.212604 -0.155172  
B -3.528146 -0.270055 -0.205225  
C -5.502793 1.403641 -0.014526  
F -4.063615 -0.827593 -1.358074  
F -3.928207 -0.932783 0.935315  
H -3.699057 3.224502 -0.348857  
C 3.502003 4.094652 0.293924  
C 4.336036 5.266211 -0.233099  
H 2.598114 3.603278 -1.622469  
H 4.061529 2.722826 -1.298200  
H 2.582613 4.467426 0.754356  
H 4.046267 3.574132 1.086262  
H 4.574227 5.962500 0.572873  
H 5.281266 4.924066 -0.664007  
H 3.801468 5.825780 -1.006240  
C -5.934574 1.505500 1.423847  
H -5.767592 2.313425 -0.562434  
H -5.983794 0.560998 -0.509777  
C -6.795689 0.672223 1.994056  
H -5.517520 2.335128 1.990355  
H -7.109281 0.800493 3.023154  
H -7.217401 -0.168568 1.453637

Compound **4aK**

SCF Done: E(RB3LYP) = -1742.060976

Zero-point correction = 0.613399

Enthalpy correction = 0.649824

Gibbs Free Energy correction = 0.548335

|   |           |           |           |
|---|-----------|-----------|-----------|
| O | 2.982081  | -2.652383 | -1.055507 |
| O | 2.800213  | -2.172613 | 1.639193  |
| N | 2.734052  | 2.098224  | -0.448411 |
| C | 0.742501  | 0.741069  | -0.390046 |
| C | 1.365296  | 2.023279  | -0.519204 |
| C | 3.474031  | 1.061622  | 0.122399  |
| C | 4.820077  | 1.255268  | 0.481825  |
| H | 5.329950  | 2.180037  | 0.266421  |
| C | 2.847869  | -0.192850 | 0.365141  |
| C | -0.512302 | -1.748547 | -0.499690 |
| C | -0.675710 | 0.619731  | -0.504510 |
| C | 1.523725  | -0.411659 | -0.161772 |
| C | 4.844905  | -0.904741 | 1.584084  |
| H | 5.371940  | -1.614534 | 2.204320  |
| C | -1.133230 | -3.009227 | -0.616482 |
| H | -2.204425 | -3.095774 | -0.580670 |
| C | 0.916350  | -1.670341 | -0.464652 |
| C | 0.567129  | 3.159196  | -0.759964 |
| H | 1.006464  | 4.137414  | -0.866920 |
| C | 3.418468  | 3.339792  | -0.881022 |
| C | 1.028317  | -4.055179 | -0.984410 |
| H | 1.582041  | -4.944031 | -1.248789 |
| C | 3.529602  | -1.129909 | 1.207276  |
| C | -1.454137 | 1.800915  | -0.640919 |
| C | 1.666764  | -2.842522 | -0.824293 |
| C | -0.803872 | 3.034243  | -0.786627 |
| H | -1.408409 | 3.925829  | -0.912247 |
| C | 5.486020  | 0.268357  | 1.180337  |
| H | 6.518088  | 0.430761  | 1.467609  |
| C | -0.364256 | -4.127867 | -0.833134 |
| H | -0.853768 | -5.088687 | -0.939511 |
| C | 3.772160  | -3.748087 | -1.520714 |
| H | 3.797283  | -4.559343 | -0.787081 |
| H | 4.774021  | -3.346842 | -1.655954 |
| H | 3.395544  | -4.124841 | -2.475714 |
| C | 3.380153  | -3.112615 | 2.547327  |
| H | 2.594632  | -3.835657 | 2.753619  |
| H | 3.682338  | -2.622885 | 3.477008  |

|   |           |           |           |
|---|-----------|-----------|-----------|
| H | 4.238230  | -3.619680 | 2.096969  |
| N | -1.279772 | -0.588279 | -0.440183 |
| C | -2.871955 | 1.755155  | -0.580226 |
| N | -3.572891 | 0.677068  | -0.414599 |
| B | -2.879094 | -0.739137 | -0.438295 |
| F | -3.255229 | -1.380441 | -1.606615 |
| F | -3.227334 | -1.449935 | 0.697442  |
| H | -3.402438 | 2.702156  | -0.649483 |
| C | 3.589449  | 4.396310  | 0.219212  |
| C | 4.311291  | 5.639134  | -0.309872 |
| H | 2.849898  | 3.743614  | -1.718991 |
| H | 4.384690  | 3.047883  | -1.291399 |
| H | 2.609924  | 4.674023  | 0.618533  |
| H | 4.145995  | 3.967740  | 1.056592  |
| H | 4.426635  | 6.383252  | 0.480155  |
| H | 5.310432  | 5.394676  | -0.681847 |
| H | 3.757716  | 6.108723  | -1.128184 |
| C | -5.071090 | 0.838691  | -0.313575 |
| C | -5.784048 | -0.017234 | -1.363062 |
| H | -5.224917 | 1.885544  | -0.590424 |
| C | -5.653056 | 0.714986  | 1.150183  |
| H | -6.850243 | 0.214557  | -1.348046 |
| H | -5.403681 | 0.203624  | -2.361608 |
| H | -5.659981 | -1.083077 | -1.185102 |
| C | -6.893130 | 1.637473  | 1.199130  |
| C | -6.097971 | -0.712617 | 1.520556  |
| C | -4.635514 | 1.220437  | 2.189080  |
| H | -7.366174 | 1.571550  | 2.181646  |
| H | -6.623385 | 2.684747  | 1.030172  |
| H | -7.645122 | 1.356382  | 0.457497  |
| H | -6.480389 | -0.713339 | 2.544867  |
| H | -6.906466 | -1.063402 | 0.875568  |
| H | -5.277730 | -1.425416 | 1.468170  |
| H | -5.106483 | 1.259298  | 3.174168  |
| H | -3.770112 | 0.559293  | 2.260906  |
| H | -4.284673 | 2.232784  | 1.960395  |

Compound **4aL**

SCF Done: E(RB3LYP) = -1718.765639

Zero-point correction = 0.573985

Enthalpy correction = 0.609288

Gibbs Free Energy correction = 0.507947

O 3.071176 -2.557102 -1.013400  
O 2.788581 -2.108720 1.679732  
N 2.617298 2.175754 -0.371360  
C 0.676800 0.743195 -0.384117  
C 1.254804 2.049699 -0.480165  
C 3.380468 1.163040 0.210658  
C 4.707478 1.404659 0.609599  
H 5.186513 2.350546 0.416584  
C 2.796006 -0.116408 0.423768  
C -0.468832 -1.794865 -0.555163  
C -0.732210 0.568586 -0.545292  
C 1.497682 -0.380752 -0.144954  
C 4.783584 -0.763261 1.693361  
H 5.319508 -1.458677 2.322201  
C -1.038081 -3.077617 -0.690708  
H -2.106277 -3.204689 -0.685569  
C 0.952945 -1.660023 -0.477051  
C 0.423163 3.159075 -0.729158  
H 0.829552 4.153891 -0.809521  
C 3.266679 3.443496 -0.782232  
C 1.172414 -4.035910 -1.001563  
H 1.767623 -4.901317 -1.253185  
C 3.489083 -1.034928 1.277249  
C -1.548976 1.726183 -0.693287  
C 1.758668 -2.799983 -0.820129  
C -0.940223 2.984125 -0.801219  
H -1.573441 3.854196 -0.935970  
C 5.390878 0.437034 1.318051  
H 6.407512 0.635557 1.636003  
C -0.219989 -4.164506 -0.888535  
H -0.667650 -5.143751 -1.009965  
C 3.918011 -3.620022 -1.454430  
H 3.953529 -4.429998 -0.719833  
H 4.906562 -3.178838 -1.559796  
H 3.585273 -4.010866 -2.419988  
C 3.375868 -3.030400 2.602018  
H 2.611464 -3.782077 2.783792  
H 3.633196 -2.533164 3.541146

H 4.264394 -3.504673 2.175512  
N -1.284773 -0.668376 -0.515016  
C -2.965289 1.623259 -0.704751  
N -3.595721 0.499037 -0.594454  
B -2.867598 -0.886598 -0.555789  
C -5.071514 0.466835 -0.553011  
F -3.220229 -1.557469 -1.715567  
F -3.256003 -1.570003 0.585134  
H -3.549701 2.536694 -0.796485  
C 3.376327 4.501478 0.324495  
C 4.059343 5.772877 -0.188361  
H 2.703481 3.830829 -1.631517  
H 4.251722 3.187270 -1.171282  
H 2.379879 4.740472 0.706733  
H 3.933654 4.092006 1.170845  
H 4.132974 6.517742 0.605900  
H 5.073066 5.567995 -0.544351  
H 3.501922 6.224130 -1.014323  
C -5.606005 0.505059 0.892806  
H -5.448306 1.310522 -1.134463  
H -5.398582 -0.451343 -1.037172  
N -7.057225 0.461152 0.899086  
H -5.217584 -0.369332 1.414770  
H -5.204403 1.398748 1.408582  
C -7.598594 -0.174033 2.097579  
C -7.672632 1.760273 0.655125  
H -8.755367 1.644657 0.578809  
H -7.459850 2.490877 1.457132  
H -7.325345 2.182353 -0.290741  
H -8.682457 -0.265076 2.000756  
H -7.185563 -1.178927 2.203915  
H -7.385443 0.391114 3.022363

**Compound 4aM**

SCF Done: E(RB3LYP) = -1660.002783

Zero-point correction = 0.505723

Enthalpy correction = 0.538358

Gibbs Free Energy correction = 0.443283

|   |           |           |           |
|---|-----------|-----------|-----------|
| O | 2.257560  | -2.706690 | -1.166666 |
| O | 2.243058  | -2.298105 | 1.547092  |
| N | 2.311617  | 2.032132  | -0.413454 |
| C | 0.249940  | 0.786931  | -0.288487 |
| C | 0.939548  | 2.035682  | -0.412660 |
| C | 3.020232  | 0.939044  | 0.086952  |
| C | 4.391966  | 1.046399  | 0.378652  |
| H | 4.942449  | 1.947463  | 0.162984  |
| C | 2.336536  | -0.285200 | 0.327781  |
| C | -1.142496 | -1.629160 | -0.393544 |
| C | -1.177670 | 0.748310  | -0.334359 |
| C | 0.977094  | -0.413901 | -0.134576 |
| C | 4.350603  | -1.144527 | 1.417201  |
| H | 4.868125  | -1.901417 | 1.987761  |
| C | -1.838599 | -2.851447 | -0.489309 |
| H | -2.909604 | -2.880131 | -0.392685 |
| C | 0.287170  | -1.628834 | -0.437374 |
| C | 0.199413  | 3.223692  | -0.577239 |
| H | 0.690745  | 4.177639  | -0.676251 |
| C | 3.043565  | 3.245925  | -0.848781 |
| C | 0.237213  | -4.004759 | -1.003502 |
| H | 0.725051  | -4.916670 | -1.315166 |
| C | 3.006719  | -1.284541 | 1.105598  |
| C | -1.889717 | 1.980071  | -0.402233 |
| C | 0.949933  | -2.831648 | -0.861668 |
| C | -1.175113 | 3.178389  | -0.542570 |
| H | -1.732191 | 4.105979  | -0.615967 |
| C | 5.035830  | 0.002956  | 1.012688  |
| H | 6.088989  | 0.098874  | 1.248658  |
| C | -1.145791 | -4.005813 | -0.768577 |
| H | -1.692204 | -4.937140 | -0.858769 |
| C | 2.960511  | -3.834220 | -1.692505 |
| H | 2.985432  | -4.657077 | -0.972004 |
| H | 3.972432  | -3.483297 | -1.881791 |
| H | 2.509566  | -4.175199 | -2.628485 |
| C | 2.813684  | -3.291411 | 2.403317  |
| H | 1.999238  | -3.973385 | 2.635594  |
| H | 3.191298  | -2.841993 | 3.325684  |

|   |           |           |           |
|---|-----------|-----------|-----------|
| H | 3.616453  | -3.835275 | 1.897394  |
| N | -1.841508 | -0.431342 | -0.273046 |
| C | -3.305224 | 2.011434  | -0.310611 |
| N | -4.031429 | 0.950689  | -0.158752 |
| B | -3.434076 | -0.498650 | -0.166989 |
| C | -5.497402 | 1.063080  | -0.051088 |
| F | -3.957589 | -1.138327 | -1.278570 |
| F | -3.772581 | -1.135478 | 1.016193  |
| H | -3.806039 | 2.976247  | -0.358389 |
| C | 3.337255  | 4.254920  | 0.269748  |
| C | 4.106762  | 5.467685  | -0.261938 |
| H | 2.455319  | 3.707324  | -1.642145 |
| H | 3.967040  | 2.911728  | -1.320819 |
| H | 2.399702  | 4.578995  | 0.730221  |
| H | 3.909578  | 3.766745  | 1.062896  |
| H | 4.308470  | 6.178092  | 0.541658  |
| H | 5.068451  | 5.175006  | -0.692956 |
| H | 3.542425  | 5.995759  | -1.036056 |
| C | -5.997307 | 0.947449  | 1.392148  |
| H | -5.810947 | 2.028480  | -0.453446 |
| H | -5.940428 | 0.275834  | -0.660083 |
| O | -7.383578 | 1.233234  | 1.317710  |
| H | -5.795866 | -0.055706 | 1.776552  |
| H | -5.465746 | 1.675337  | 2.022957  |
| H | -7.800844 | 0.968395  | 2.142283  |



Compound **4aN**

SCF Done: E(RB3LYP) = -1620.61940188

Zero-point correction = 0.475931

Enthalpy correction = 0.507139

Gibbs Free Energy correction = 0.415822

|   |           |           |           |
|---|-----------|-----------|-----------|
| O | 1.601621  | -2.826962 | -1.300591 |
| O | 1.799305  | -2.526419 | 1.424895  |
| N | 2.294796  | 1.833039  | -0.407434 |
| C | 0.101739  | 0.848907  | -0.190753 |
| C | 0.935528  | 2.006111  | -0.321398 |
| C | 2.888195  | 0.644307  | 0.015176  |
| C | 4.277550  | 0.570411  | 0.223224  |
| H | 4.923132  | 1.403787  | -0.000385 |
| C | 2.070965  | -0.494538 | 0.261988  |
| C | -1.583276 | -1.376481 | -0.270046 |
| C | -1.319695 | 0.988291  | -0.148908 |
| C | 0.681852  | -0.436965 | -0.117872 |
| C | 4.021693  | -1.634522 | 1.199153  |
| H | 4.472080  | -2.469386 | 1.715257  |
| C | -2.424492 | -2.505794 | -0.337092 |
| H | -3.482325 | -2.413934 | -0.165838 |
| C | -0.170344 | -1.546796 | -0.410232 |
| C | 0.343675  | 3.280927  | -0.406772 |
| H | 0.944262  | 4.169842  | -0.508485 |
| C | 3.145411  | 2.962128  | -0.854424 |
| C | -0.542916 | -3.883011 | -1.020047 |
| H | -0.190568 | -4.837624 | -1.382087 |
| C | 2.655477  | -1.597204 | 0.966812  |
| C | -1.871923 | 2.300254  | -0.147790 |
| C | 0.312894  | -2.806214 | -0.906266 |
| C | -1.021948 | 3.405363  | -0.295842 |
| H | -1.462153 | 4.395974  | -0.316036 |
| C | 4.821073  | -0.566538 | 0.785765  |

|   |           |           |           |
|---|-----------|-----------|-----------|
| H | 5.889843  | -0.610057 | 0.958630  |
| C | -1.895852 | -3.726391 | -0.686486 |
| H | -2.555145 | -4.583680 | -0.753243 |
| C | 2.130765  | -4.017960 | -1.887198 |
| H | 2.110183  | -4.850952 | -1.178324 |
| H | 3.160731  | -3.782087 | -2.144929 |
| H | 1.578814  | -4.287433 | -2.791817 |
| C | 2.289800  | -3.598107 | 2.235751  |
| H | 1.411898  | -4.179673 | 2.506785  |
| H | 2.770344  | -3.214602 | 3.139731  |
| H | 2.990449  | -4.226616 | 1.678774  |
| N | -2.122139 | -0.106288 | -0.074560 |
| C | -3.267597 | 2.511026  | -0.003144 |
| N | -4.089081 | 1.531025  | 0.183363  |
| B | -3.694308 | -0.004642 | 0.172432  |
| O | -5.421514 | 1.900806  | 0.137930  |
| F | -4.407471 | -0.574948 | -0.860043 |
| F | -3.986332 | -0.560655 | 1.400951  |
| H | -3.691086 | 3.509003  | -0.054396 |
| C | 3.627678  | 3.889558  | 0.269645  |
| C | 4.500676  | 5.021677  | -0.279814 |
| H | 2.573713  | 3.519786  | -1.596347 |
| H | 3.990636  | 2.534228  | -1.392667 |
| H | 2.766012  | 4.304773  | 0.799919  |
| H | 4.186065  | 3.310424  | 1.009529  |
| H | 4.834851  | 5.676401  | 0.526851  |
| H | 5.391882  | 4.633675  | -0.781288 |
| H | 3.954889  | 5.637100  | -1.000861 |
| C | -6.281595 | 1.161557  | 1.038175  |
| H | -5.923105 | 1.237366  | 2.065135  |
| H | -7.240805 | 1.663102  | 0.928547  |
| H | -6.361158 | 0.120427  | 0.730144  |

## 7. Vertical excitations of BODIPY compounds 4a

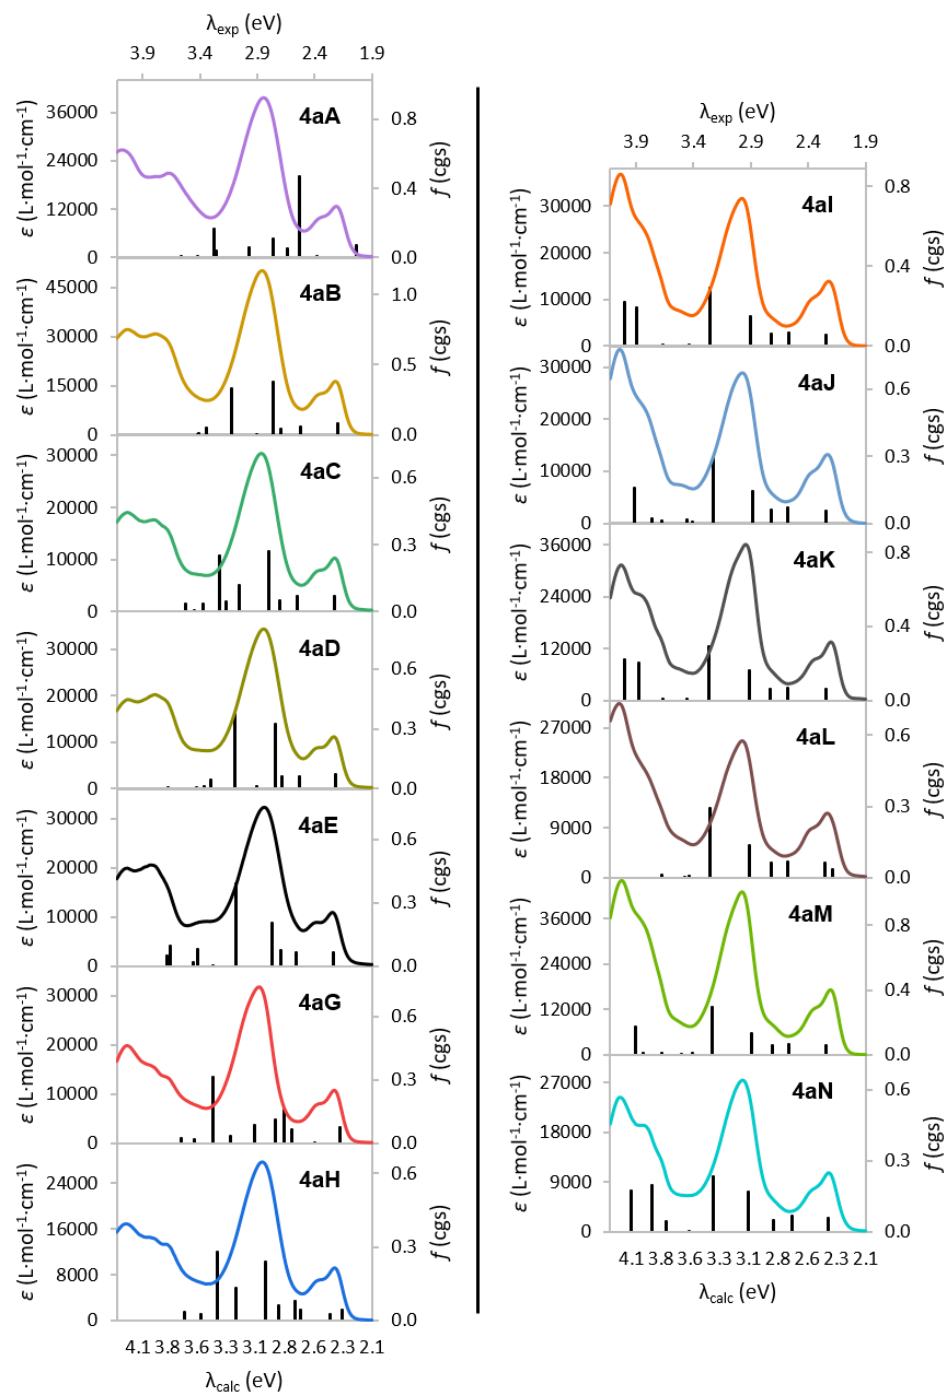

**Figure S7.** Computed excited states and experimental absorption spectra of BODIPY derivatives **4a**. 0.15 eV offset applied to all  $\lambda_{\text{calc}}$  axes. Computed at the B3LYP/6-311G(d,p) level of theory in gas phase.

**Table S1. Ten first transitions of BODIPY derivative 4aA computed at the B3LYP/6-311G(d,p) level of theory in gas phase.**

| Transition | $\lambda$ (nm) | Energy (eV) | $f$ (cgs) | From MO | To MO | CI Coefficient | Contribution (%) |
|------------|----------------|-------------|-----------|---------|-------|----------------|------------------|
| 1          | 564            | 2.20        | 0.0695    | 144     | 145   | 0.693          | 96.0             |
| 2          | 488            | 2.54        | 0.0074    | 143     | 145   | 0.653          | 85.3             |
| 3          | 460            | 2.70        | 0.4707    | 144     | 146   | 0.681          | 92.8             |
| 4          | 442            | 2.80        | 0.0526    | 142     | 145   | 0.622          | 77.4             |
| 5          | 424            | 2.93        | 0.1110    | 141     | 145   | 0.610          | 74.5             |
| 6          | 395            | 3.14        | 0.0558    | 143     | 146   | 0.669          | 89.5             |
| 7          | 362            | 3.42        | 0.0403    | 140     | 145   | 0.631          | 79.7             |
| 8          | 360            | 3.44        | 0.1678    | 142     | 146   | 0.586          | 68.6             |
| 9          | 346            | 3.58        | 0.0097    | 141     | 146   | 0.686          | 94.1             |
| 10         | 333            | 3.73        | 0.0015    | 140     | 146   | 0.694          | 96.4             |

**Table S2. Ten first transitions of BODIPY derivative 4aA computed at the B3LYP/6-311G(d,p) level of theory in acetonitrile as implicit solvent.**

| Transition | $\lambda$ (nm) | Energy (eV) | $f$ (cgs) | From MO | To MO | CI Coefficient | Contribution (%) |
|------------|----------------|-------------|-----------|---------|-------|----------------|------------------|
| 1          | 538            | 2.30        | 0.1100    | 144     | 145   | 0.688          | 94.8             |
| 2          | 465            | 2.67        | 0.0582    | 143     | 145   | 0.645          | 83.1             |
| 3          | 451            | 2.75        | 0.1453    | 141     | 145   | 0.387          | 29.9             |
|            |                |             |           | 142     | 145   | 0.513          | 52.7             |
| 4          | 445            | 2.79        | 0.5435    | 144     | 146   | 0.658          | 86.6             |
| 5          | 415            | 2.99        | 0.0891    | 141     | 145   | 0.477          | 45.5             |
|            |                |             |           | 142     | 145   | -0.373         | 27.8             |
| 6          | 385            | 3.22        | 0.2740    | 143     | 146   | 0.653          | 85.3             |
| 7          | 369            | 3.36        | 0.0343    | 142     | 146   | 0.671          | 90.1             |
| 8          | 355            | 3.49        | 0.0062    | 141     | 146   | 0.694          | 96.2             |
| 9          | 326            | 3.81        | 0.0292    | 139     | 145   | 0.490          | 48.0             |
|            |                |             |           | 144     | 147   | 0.444          | 39.5             |
| 10         | 321            | 3.87        | 0.0010    | 140     | 145   | 0.694          | 96.3             |

**Table S3. Ten first transitions of BODIPY derivative 4aB computed at the B3LYP/6-311G(d,p) level of theory in gas phase.**

| Transition | $\lambda$ (nm) | Energy (eV) | $f$ (cgs) | From MO | To MO | CI Coefficient | Contribution (%) |
|------------|----------------|-------------|-----------|---------|-------|----------------|------------------|
| 1          | 524            | 2.36        | 0.0797    | 140     | 141   | 0.676          | 91.4             |
| 2          | 461            | 2.69        | 0.0582    | 139     | 141   | 0.662          | 87.7             |
| 3          | 434            | 2.86        | 0.0463    | 137     | 141   | -0.447         | 40.0             |
|            |                |             |           | 138     | 141   | 0.530          | 56.1             |
| 4          | 424            | 2.93        | 0.3746    | 140     | 142   | 0.687          | 94.3             |
| 5          | 405            | 3.06        | 0.0078    | 137     | 141   | 0.419          | 35.2             |
|            |                |             |           | 138     | 141   | 0.413          | 34.2             |
| 6          | 378            | 3.28        | 0.3311    | 139     | 142   | 0.590          | 69.5             |
| 7          | 377            | 3.29        | 0.0091    | 136     | 141   | 0.689          | 95.0             |
| 8          | 353            | 3.51        | 0.0509    | 138     | 142   | 0.658          | 86.7             |
| 9          | 347            | 3.57        | 0.0102    | 137     | 142   | 0.649          | 84.2             |
| 10         | 346            | 3.59        | 0.0030    | 136     | 142   | 0.651          | 84.7             |

**Table S4. Ten first transitions of BODIPY derivative 4aB computed at the B3LYP/6-311G(d,p) level of theory in acetonitrile as implicit solvent.**

| Transition | $\lambda$ (nm) | Energy (eV) | $f$ (cgs) | From MO | To MO | CI Coefficient | Contribution (%) |
|------------|----------------|-------------|-----------|---------|-------|----------------|------------------|
| 1          | 524            | 2.37        | 0.1066    | 140     | 141   | 0.688          | 94.6             |
| 2          | 464            | 2.67        | 0.0602    | 139     | 141   | 0.695          | 96.7             |
| 3          | 442            | 2.80        | 0.0647    | 138     | 141   | 0.675          | 91.2             |
| 4          | 429            | 2.89        | 0.5713    | 140     | 142   | 0.693          | 95.9             |
| 5          | 387            | 3.21        | 0.1356    | 139     | 142   | 0.619          | 76.7             |
| 6          | 366            | 3.39        | 0.2452    | 137     | 141   | 0.622          | 77.5             |
| 7          | 361            | 3.44        | 0.0103    | 138     | 142   | 0.664          | 88.3             |
| 8          | 337            | 3.68        | 0.1083    | 137     | 142   | 0.669          | 89.5             |
| 9          | 331            | 3.74        | 0.0003    | 136     | 141   | 0.697          | 97.0             |
| 10         | 324            | 3.83        | 0.0302    | 135     | 141   | 0.518          | 53.6             |
|            |                |             |           | 140     | 143   | 0.417          | 34.7             |

**Table S5. Ten first transitions of BODIPY derivative 4aC computed at the B3LYP/6-311G(d,p) level of theory in gas phase.**

| Transition | $\lambda$ (nm) | Energy (eV) | $f$ (cgs) | From MO | To MO | CI Coefficient | Contribution (%) |
|------------|----------------|-------------|-----------|---------|-------|----------------|------------------|
| 1          | 519            | 2.39        | 0.0711    | 136     | 137   | 0.676          | 91.5             |
| 2          | 457            | 2.72        | 0.0689    | 135     | 137   | 0.673          | 90.6             |
| 3          | 432            | 2.87        | 0.0511    | 134     | 137   | 0.674          | 90.8             |
| 4          | 419            | 2.96        | 0.2725    | 136     | 138   | 0.686          | 94.2             |
| 5          | 385            | 3.22        | 0.1190    | 135     | 138   | 0.508          | 51.6             |
| 6          | 372            | 3.34        | 0.0448    | 133     | 137   | 0.594          | 70.4             |
| 7          | 365            | 3.40        | 0.2496    | 132     | 137   | 0.532          | 56.6             |
|            |                |             |           | 135     | 138   | 0.368          | 27.0             |
| 8          | 350            | 3.54        | 0.0354    | 134     | 138   | 0.662          | 87.6             |
| 9          | 343            | 3.61        | 0.0031    | 133     | 138   | 0.663          | 87.8             |
| 10         | 336            | 3.68        | 0.0361    | 132     | 138   | 0.656          | 86.1             |

**Table S6. Ten first transitions of BODIPY derivative 4aC computed at the B3LYP/6-311G(d,p) level of theory in acetonitrile as implicit solvent.**

| Transition | $\lambda$ (nm) | Energy (eV) | $f$ (cgs) | From MO | To MO | CI Coefficient | Contribution (%) |
|------------|----------------|-------------|-----------|---------|-------|----------------|------------------|
| 1          | 520            | 2.38        | 0.1013    | 136     | 137   | 0.687          | 94.3             |
| 2          | 465            | 2.67        | 0.0589    | 135     | 137   | 0.695          | 96.6             |
| 3          | 441            | 2.81        | 0.0694    | 134     | 137   | 0.676          | 91.3             |
| 4          | 425            | 2.92        | 0.4888    | 136     | 138   | 0.691          | 95.4             |
| 5          | 385            | 3.22        | 0.2434    | 135     | 138   | 0.658          | 86.6             |
| 6          | 361            | 3.43        | 0.0192    | 134     | 138   | 0.693          | 96.2             |
| 7          | 346            | 3.58        | 0.1447    | 133     | 137   | 0.679          | 92.1             |
| 8          | 327            | 3.79        | 0.0005    | 132     | 137   | 0.695          | 96.7             |
| 9          | 325            | 3.81        | 0.1539    | 131     | 137   | 0.552          | 60.9             |
| 10         | 320            | 3.88        | 0.0681    | 133     | 138   | 0.533          | 56.8             |
|            |                |             |           | 136     | 139   | 0.376          | 28.2             |



**Table S7. Ten first transitions of BODIPY derivative 4aC computed at the CAM-B3LYP/6-311G(d,p) level of theory in gas phase.**

| Transition | $\lambda$ (nm) | Energy (eV) | $f$ (cgs) | From MO | To MO | CI Coefficient | Contribution (%) |
|------------|----------------|-------------|-----------|---------|-------|----------------|------------------|
| 1          | 433            | 2.86        | 0.1858    | 136     | 137   | 0.674          | 90.8             |
| 2          | 393            | 3.15        | 0.1423    | 135     | 137   | 0.600          | 72.1             |
| 3          | 373            | 3.33        | 0.0183    | 134     | 137   | 0.598          | 71.4             |
| 4          | 360            | 3.44        | 0.5686    | 136     | 138   | 0.630          | 79.5             |
| 5          | 305            | 4.07        | 0.1206    | 135     | 138   | 0.431          | 37.1             |
| 6          | 294            | 4.22        | 0.0580    | 131     | 137   | 0.428          | 36.6             |
|            |                |             |           | 135     | 138   | 0.383          | 29.4             |
| 7          | 284            | 4.36        | 0.1756    | 134     | 138   | 0.313          | <b>19.6</b>      |
| 8          | 278            | 4.46        | 0.0322    | 133     | 137   | 0.412          | 33.9             |
|            |                |             |           | 133     | 138   | -0.388         | 30.1             |
| 9          | 271            | 4.58        | 0.0049    | 132     | 138   | 0.531          | 56.3             |
| 10         | 269            | 4.61        | 0.2022    | 134     | 138   | 0.473          | 44.8             |

**Table S8. Ten first transitions of BODIPY derivative 4aD computed at the B3LYP/6-311G(d,p) level of theory in gas phase.**

| Transition | $\lambda$ (nm) | Energy (eV) | $f$ (cgs) | From MO | To MO | CI Coefficient | Contribution (%) |
|------------|----------------|-------------|-----------|---------|-------|----------------|------------------|
| 1          | 521            | 2.38        | 0.0758    | 139     | 140   | 0.670          | 89.9             |
| 2          | 460            | 2.70        | 0.0650    | 138     | 140   | 0.654          | 85.5             |
| 3          | 436            | 2.85        | 0.0637    | 136     | 140   | -0.453         | 41.1             |
|            |                |             |           | 137     | 140   | 0.507          | 51.4             |
| 4          | 426            | 2.91        | 0.3271    | 139     | 141   | 0.683          | 93.2             |
| 5          | 404            | 3.07        | 0.0117    | 136     | 140   | 0.369          | 27.3             |
|            |                |             |           | 137     | 140   | 0.421          | 35.4             |
|            |                |             |           | 138     | 141   | -0.380         | 28.9             |
| 6          | 380            | 3.26        | 0.3771    | 138     | 141   | 0.552          | 60.9             |
| 7          | 358            | 3.47        | 0.0470    | 137     | 141   | 0.660          | 87.2             |
| 8          | 352            | 3.52        | 0.0109    | 136     | 141   | 0.693          | 95.9             |
| 9          | 345            | 3.60        | 0.0005    | 135     | 140   | 0.694          | 96.2             |
| 10         | 323            | 3.84        | 0.0015    | 135     | 141   | 0.689          | 94.9             |

**Table S9. Ten first transitions of BODIPY derivative 4aE computed at the B3LYP/6-311G(d,p) level of theory in gas phase.**

| Transition | $\lambda$ (nm) | Energy (eV) | $f$ (cgs) | From MO | To MO | CI Coefficient | Contribution (%) |
|------------|----------------|-------------|-----------|---------|-------|----------------|------------------|
| 1          | 516            | 2.40        | 0.0666    | 152     | 153   | 0.674          | 90.7             |
| 2          | 456            | 2.72        | 0.0671    | 151     | 153   | 0.667          | 89.1             |
| 3          | 434            | 2.86        | 0.0750    | 150     | 153   | 0.649          | 84.2             |
| 4          | 422            | 2.93        | 0.2045    | 152     | 154   | 0.668          | 89.3             |
| 5          | 382            | 3.25        | 0.3924    | 151     | 154   | 0.624          | 78.0             |
| 6          | 359            | 3.46        | 0.0042    | 150     | 154   | 0.676          | 91.3             |
| 7          | 346            | 3.58        | 0.0785    | 149     | 153   | 0.664          | 88.0             |
| 8          | 342            | 3.63        | 0.0186    | 148     | 153   | 0.682          | 93.0             |
| 9          | 324            | 3.82        | 0.0971    | 149     | 154   | 0.645          | 83.1             |
| 10         | 322            | 3.86        | 0.0496    | 147     | 153   | 0.437          | 38.1             |
|            |                |             |           | 148     | 154   | -0.396         | 31.4             |

**Table S10. Ten first transitions of BODIPY derivative 4aG computed at the B3LYP/6-311G(d,p) level of theory in gas phase.**

| Transition | $\lambda$ (nm) | Energy (eV) | $f$ (cgs) | From MO | To MO | CI Coefficient | Contribution (%) |
|------------|----------------|-------------|-----------|---------|-------|----------------|------------------|
| 1          | 529            | 2.34        | 0.0752    | 144     | 145   | 0.664          | 88.1             |
| 2          | 483            | 2.57        | 0.0050    | 143     | 145   | 0.626          | 78.3             |
| 3          | 449            | 2.76        | 0.0649    | 142     | 145   | 0.634          | 80.3             |
| 4          | 438            | 2.83        | 0.1566    | 144     | 146   | 0.616          | 75.8             |
| 5          | 427            | 2.90        | 0.1106    | 141     | 145   | 0.643          | 82.8             |
| 6          | 401            | 3.09        | 0.0842    | 143     | 146   | 0.661          | 87.5             |
| 7          | 376            | 3.30        | 0.0365    | 140     | 145   | 0.567          | 64.4             |
|            |                |             |           | 142     | 146   | -0.376         | 28.3             |
| 8          | 360            | 3.45        | 0.3154    | 140     | 145   | 0.400          | 32.0             |
|            |                |             |           | 142     | 146   | 0.542          | 58.7             |
| 9          | 343            | 3.61        | 0.0163    | 141     | 146   | 0.677          | 91.6             |
| 10         | 333            | 3.73        | 0.0246    | 140     | 146   | 0.687          | 94.3             |

**Table S11. Ten first transitions of BODIPY derivative 4aH computed at the B3LYP/6-311G(d,p) level of theory in gas phase.**

| Transition | $\lambda$ (nm) | Energy (eV) | $f$ (cgs) | From MO | To MO | CI Coefficient | Contribution (%) |
|------------|----------------|-------------|-----------|---------|-------|----------------|------------------|
| 1          | 534            | 2.32        | 0.0427    | 144     | 145   | 0.655          | 85.8             |
| 2          | 510            | 2.43        | 0.0283    | 143     | 145   | 0.627          | 78.7             |
| 3          | 462            | 2.68        | 0.0450    | 144     | 146   | 0.660          | 87.0             |
| 4          | 453            | 2.74        | 0.0778    | 142     | 145   | 0.640          | 81.8             |
| 5          | 431            | 2.88        | 0.0598    | 141     | 145   | 0.673          | 90.7             |
| 6          | 415            | 2.99        | 0.2394    | 143     | 146   | 0.681          | 92.8             |
| 7          | 381            | 3.25        | 0.1329    | 140     | 145   | -0.438         | 38.3             |
|            |                |             |           | 142     | 146   | 0.507          | 51.4             |
| 8          | 364            | 3.41        | 0.2802    | 140     | 145   | 0.529          | 55.9             |
|            |                |             |           | 142     | 146   | 0.413          | 34.1             |
| 9          | 349            | 3.56        | 0.0267    | 141     | 146   | 0.668          | 89.4             |
| 10         | 336            | 3.69        | 0.0363    | 140     | 146   | 0.684          | 93.7             |

**Table S12. Ten first transitions of BODIPY derivative 4aI computed at the B3LYP/6-311G(d,p) level of theory in gas phase.**

| Transition | $\lambda$ (nm) | Energy (eV) | $f$ (cgs) | From MO | To MO | CI Coefficient | Contribution (%) |
|------------|----------------|-------------|-----------|---------|-------|----------------|------------------|
| 1          | 515            | 2.41        | 0.0589    | 128     | 129   | 0.678          | 92.0             |
| 2          | 453            | 2.74        | 0.0690    | 127     | 129   | 0.681          | 92.6             |
| 3          | 430            | 2.88        | 0.0603    | 126     | 129   | 0.677          | 91.5             |
| 4          | 404            | 3.07        | 0.1477    | 128     | 130   | 0.678          | 92.0             |
| 5          | 363            | 3.41        | 0.2942    | 127     | 130   | 0.646          | 83.5             |
| 6          | 345            | 3.60        | 0.0076    | 126     | 130   | 0.690          | 95.3             |
| 7          | 323            | 3.83        | 0.0086    | 125     | 129   | 0.545          | 59.3             |
|            |                |             |           | 128     | 131   | -0.436         | 38.0             |
| 8          | 305            | 4.06        | 0.1907    | 124     | 129   | 0.634          | 80.3             |
| 9          | 298            | 4.16        | 0.2182    | 125     | 129   | 0.368          | 27.2             |
|            |                |             |           | 128     | 131   | 0.484          | 46.9             |
| 10         | 282            | 4.40        | 0.0895    | 125     | 130   | 0.505          | 51.0             |
|            |                |             |           | 127     | 131   | 0.414          | 34.3             |

**Table S13. Ten first transitions of BODIPY derivative 4aJ computed at the B3LYP/6-311G(d,p) level of theory in gas phase.**

| Transition | $\lambda$ (nm) | Energy (eV) | $f$ (cgs) | From MO | To MO | CI Coefficient | Contribution (%) |
|------------|----------------|-------------|-----------|---------|-------|----------------|------------------|
| 1          | 515            | 2.41        | 0.0591    | 127     | 128   | 0.678          | 91.9             |
| 2          | 453            | 2.74        | 0.0689    | 126     | 128   | 0.679          | 92.1             |
| 3          | 430            | 2.88        | 0.0610    | 125     | 128   | 0.674          | 90.8             |
| 4          | 407            | 3.05        | 0.1436    | 127     | 129   | 0.679          | 92.2             |
| 5          | 366            | 3.39        | 0.2986    | 126     | 129   | 0.641          | 82.3             |
| 6          | 347            | 3.58        | 0.0066    | 125     | 129   | 0.683          | 93.3             |
| 7          | 342            | 3.62        | 0.0159    | 124     | 128   | 0.687          | 94.4             |
| 8          | 323            | 3.84        | 0.0102    | 123     | 128   | 0.540          | 58.4             |
|            |                |             |           | 127     | 130   | 0.438          | 38.4             |
| 9          | 315            | 3.93        | 0.0231    | 124     | 129   | 0.690          | 95.3             |
| 10         | 304            | 4.08        | 0.1607    | 122     | 128   | 0.637          | 81.2             |

**Table S14. Ten first transitions of BODIPY derivative 4aK computed at the B3LYP/6-311G(d,p) level of theory in gas phase.**

| Transition | $\lambda$ (nm) | Energy (eV) | $f$ (cgs) | From MO | To MO | CI Coefficient | Contribution (%) |
|------------|----------------|-------------|-----------|---------|-------|----------------|------------------|
| 1          | 515            | 2.41        | 0.0647    | 140     | 141   | 0.680          | 92.5             |
| 2          | 452            | 2.74        | 0.0689    | 139     | 141   | 0.683          | 93.2             |
| 3          | 429            | 2.89        | 0.0598    | 138     | 141   | 0.680          | 92.4             |
| 4          | 403            | 3.08        | 0.1650    | 140     | 142   | 0.683          | 93.2             |
| 5          | 361            | 3.43        | 0.2953    | 139     | 142   | 0.651          | 84.8             |
| 6          | 342            | 3.62        | 0.0067    | 138     | 142   | 0.689          | 94.9             |
| 7          | 324            | 3.83        | 0.0076    | 137     | 141   | 0.542          | 58.8             |
|            |                |             |           | 140     | 143   | -0.432         | 37.3             |
| 8          | 306            | 4.05        | 0.2021    | 136     | 141   | 0.607          | 73.8             |
| 9          | 298            | 4.16        | 0.2243    | 140     | 143   | 0.485          | 47.0             |
| 10         | 281            | 4.41        | 0.0929    | 137     | 142   | 0.484          | 46.9             |
|            |                |             |           | 139     | 143   | 0.435          | 37.8             |



**Table S15. Ten first transitions of BODIPY derivative 4aL computed at the B3LYP/6-311G(d,p) level of theory in gas phase.**

| Transition | $\lambda$ (nm) | Energy (eV) | $f$ (cgs) | From MO | To MO | CI Coefficient | Contribution (%) |
|------------|----------------|-------------|-----------|---------|-------|----------------|------------------|
| 1          | 637            | 1.95        | 0.0059    | 136     | 137   | 0.705          | 99.5             |
| 2          | 527            | 2.35        | 0.0340    | 136     | 138   | 0.702          | 98.5             |
| 3          | 514            | 2.41        | 0.0649    | 135     | 137   | 0.675          | 91.3             |
| 4          | 453            | 2.74        | 0.0682    | 134     | 137   | 0.680          | 92.4             |
| 5          | 430            | 2.89        | 0.0628    | 133     | 137   | 0.675          | 91.1             |
| 6          | 404            | 3.07        | 0.1368    | 135     | 138   | 0.678          | 92.0             |
| 7          | 363            | 3.42        | 0.2925    | 134     | 138   | 0.647          | 83.6             |
| 8          | 345            | 3.60        | 0.0067    | 133     | 138   | 0.681          | 92.7             |
| 9          | 341            | 3.64        | 0.0028    | 136     | 139   | 0.690          | 95.3             |
| 10         | 323            | 3.84        | 0.0109    | 132     | 137   | 0.544          | 59.3             |
|            |                |             |           | 135     | 139   | -0.426         | 36.2             |

**Table S16. Ten first transitions of BODIPY derivative 4aM computed at the B3LYP/6-311G(d,p) level of theory in gas phase.**

| Transition | $\lambda$ (nm) | Energy (eV) | $f$ (cgs) | From MO | To MO | CI Coefficient | Contribution (%) |
|------------|----------------|-------------|-----------|---------|-------|----------------|------------------|
| 1          | 514            | 2.41        | 0.0559    | 128     | 129   | 0.677          | 91.7             |
| 2          | 453            | 2.74        | 0.0681    | 127     | 129   | 0.679          | 92.1             |
| 3          | 431            | 2.88        | 0.0614    | 126     | 129   | 0.673          | 90.5             |
| 4          | 405            | 3.06        | 0.1351    | 128     | 130   | 0.676          | 91.4             |
| 5          | 365            | 3.40        | 0.2973    | 127     | 130   | 0.642          | 82.4             |
| 6          | 347            | 3.57        | 0.0085    | 126     | 130   | 0.690          | 95.3             |
| 7          | 338            | 3.67        | 0.0018    | 125     | 129   | 0.701          | 98.4             |
| 8          | 323            | 3.84        | 0.0093    | 124     | 129   | 0.544          | 59.2             |
|            |                |             |           | 128     | 131   | -0.435         | 37.9             |
| 9          | 310            | 4.00        | 0.0103    | 125     | 130   | 0.694          | 96.4             |
| 10         | 305            | 4.07        | 0.1732    | 123     | 129   | 0.635          | 80.6             |

**Table S17. Ten first transitions of BODIPY derivative 4aN computed at the B3LYP/6-311G(d,p) level of theory in gas phase.**

| Transition | $\lambda$ (nm) | Energy (eV) | $f$ (cgs) | From MO | To MO | CI Coefficient | Contribution (%) |
|------------|----------------|-------------|-----------|---------|-------|----------------|------------------|
| 1          | 519            | 2.39        | 0.0567    | 124     | 125   | 0.679          | 92.3             |
| 2          | 458            | 2.71        | 0.0689    | 123     | 125   | 0.683          | 93.4             |
| 3          | 433            | 2.86        | 0.0486    | 122     | 125   | 0.683          | 93.3             |
| 4          | 402            | 3.09        | 0.1695    | 124     | 126   | 0.672          | 90.3             |
| 5          | 365            | 3.39        | 0.2324    | 123     | 126   | 0.639          | 81.7             |
| 6          | 344            | 3.60        | 0.0039    | 122     | 126   | 0.686          | 94.2             |
| 7          | 327            | 3.80        | 0.0436    | 121     | 125   | 0.490          | 48.0             |
|            |                |             |           | 124     | 127   | -0.354         | 25.1             |
| 8          | 316            | 3.92        | 0.1986    | 120     | 125   | -0.376         | 28.3             |
|            |                |             |           | 121     | 125   | 0.443          | 39.3             |
| 9          | 302            | 4.11        | 0.1759    | 120     | 125   | 0.395          | 31.3             |
|            |                |             |           | 124     | 127   | 0.461          | 42.5             |
| 10         | 283            | 4.38        | 0.0894    | 121     | 126   | 0.388          | 30.1             |
|            |                |             |           | 123     | 127   | 0.447          | 40.0             |

## 8. Frontier Molecular Orbitals of BODIPYs 4a

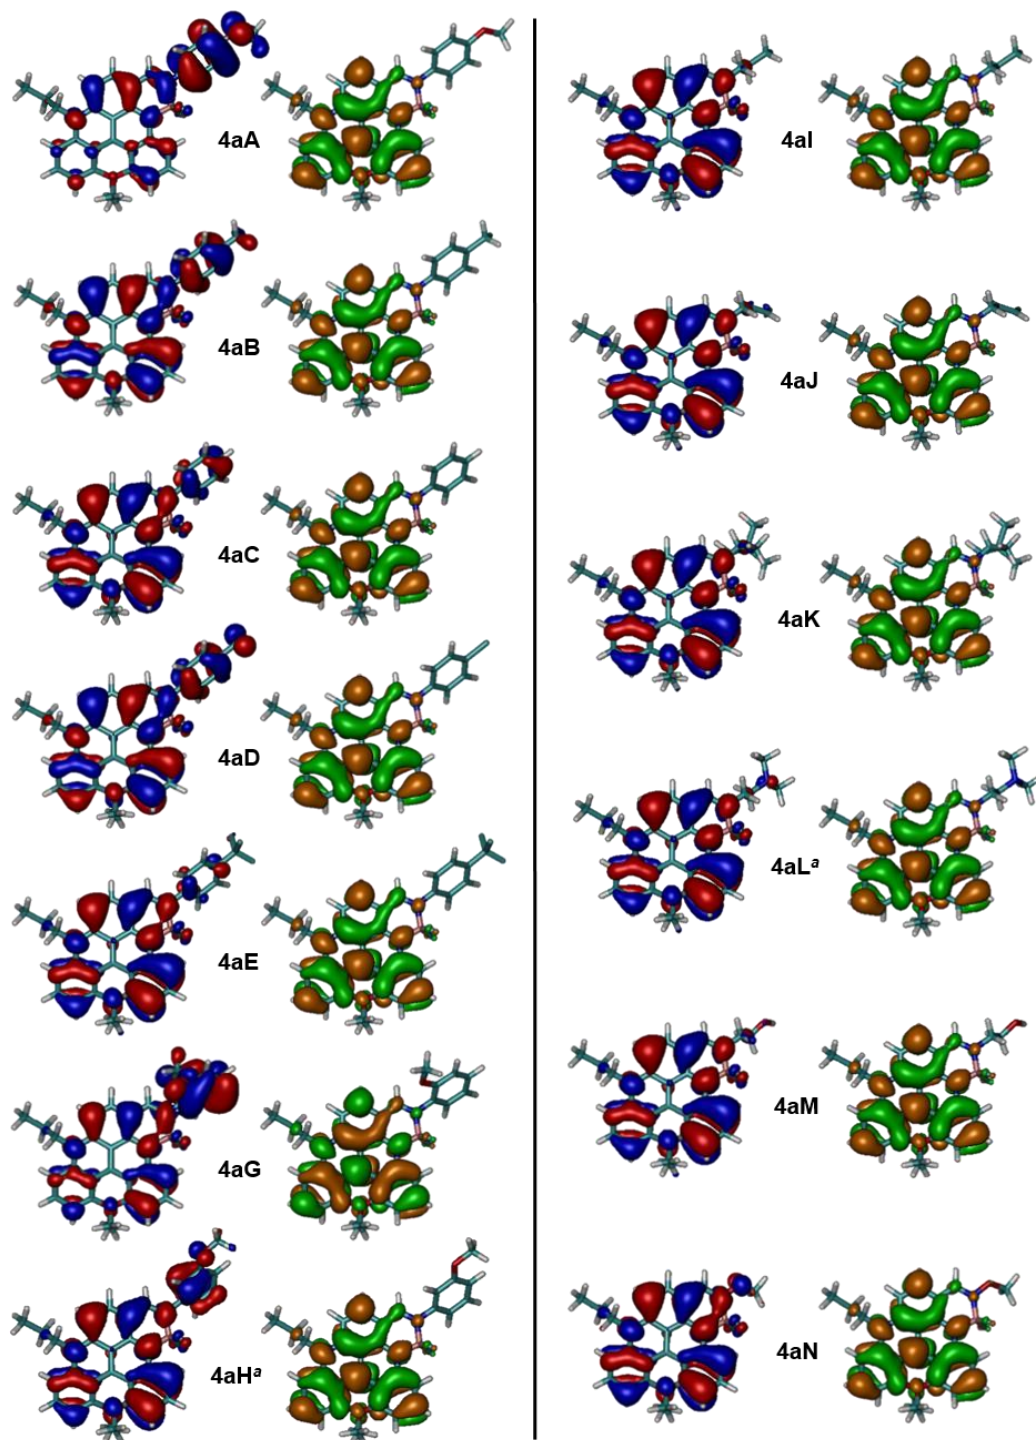

**Figure S8.** HOMO (red and blue lobes) and LUMO (orange and green lobes) representations of compounds **4a** computed at the B3LYP/6-311G(d,p) level of theory in gas phase. Isovalues  $\pm 0.02$ . <sup>a</sup>HOMO-1 and LUMO are represented.

## 9. Computed spin densities of compound 4aA

|                                    |      |           |
|------------------------------------|------|-----------|
| SCF Done: E(RB3LYP) = -1851.946427 | 32 C | 0.000678  |
| Charge: 0                          | 36 C | 0.000627  |
| Multiplicity: 2                    | 40 N | 0.046352  |
| Unpaired e <sup>-</sup> :          | 41 C | 0.027493  |
| 1                                  | 42 N | -0.001625 |
| Spin state: doublet                | 43 B | 0.001098  |
| 1 O                                | 44 C | 0.000302  |
| 2 O                                | 45 C | 0.000134  |
| 3 N                                | 46 C | -0.000272 |
| 4 C                                | 47 C | 0.000379  |
| 5 C                                | 48 C | -0.000221 |
| 6 C                                | 49 C | 0.000544  |
| 7 C                                | 54 F | 0.000980  |
| 9 C                                | 55 F | 0.000975  |
| 10 C                               | 57 C | 0.003651  |
| 11 C                               | 58 C | 0.000516  |
| <b>12 C 0.424937</b>               | 59 O | -0.000089 |
| 13 C                               | 67 C | 0.000009  |
| 15 C                               |      |           |
| 17 C                               |      |           |
| 18 C                               |      |           |
| 20 C                               |      |           |
| 21 C                               |      |           |
| 23 C                               |      |           |
| 24 C                               |      |           |
| 25 C                               |      |           |
| 26 C                               |      |           |
| 28 C                               |      |           |
| 30 C                               |      |           |

|                                    |                      |
|------------------------------------|----------------------|
| SCF Done: E(RB3LYP) = -1851.986376 | <b>41 C 0.375530</b> |
| Charge: -1                         | 42 N 0.155608        |
| Multiplicity: 3                    | 43 B -0.008470       |
| Unpaired e <sup>-</sup> :          | 44 C -0.009199       |
| 2                                  | 45 C 0.028596        |
| Spin state: triplet                | 46 C -0.016375       |
| 1 O 0.007226                       | 47 C 0.039665        |
| 2 O 0.009216                       | 48 C -0.017404       |
| 3 N 0.068577                       | 49 C 0.039230        |
| 4 C -0.095436                      | 54 F 0.002874        |
| <b>5 C 0.285057</b>                | 55 F 0.003000        |
| 6 C 0.084568                       | 57 C 0.002648        |
| 7 C -0.025739                      | 58 C 0.000787        |
| 9 C -0.076986                      | 59 O 0.003776        |
| 10 C 0.065767                      | 67 C 0.001012        |
| <b>11 C 0.203452</b>               |                      |
| <b>12 C 0.471610</b>               |                      |
| 13 C -0.036082                     |                      |
| 15 C -0.005146                     |                      |
| 17 C -0.080216                     |                      |
| 18 C -0.133382                     |                      |
| 20 C 0.002780                      |                      |
| 21 C -0.017649                     |                      |
| 23 C 0.109488                      |                      |
| 24 C -0.112132                     |                      |
| 25 C 0.091330                      |                      |
| <b>26 C 0.258092</b>               |                      |
| 28 C 0.126596                      |                      |
| 30 C 0.078948                      |                      |
| 32 C 0.000754                      |                      |
| 36 C 0.001537                      |                      |
| 40 N 0.116494                      |                      |

|                                    |             |                 |
|------------------------------------|-------------|-----------------|
| SCF Done: E(RB3LYP) = -1851.443736 | 41 C        | -0.070005       |
| Charge: +2                         | 42 N        | 0.082121        |
| Multiplicity: 2                    | 43 B        | -0.002895       |
| Unpaired e <sup>-</sup> :          | <b>44 C</b> | <b>0.135857</b> |
| 1                                  | 45 C        | -0.024997       |
| Spin state: doublet                | 46 C        | 0.066254        |
| 1 O                                | 47 C        | 0.081644        |
| 2 O                                | 48 C        | 0.039515        |
| 3 N                                | 49 C        | 0.004692        |
| 4 C                                | 54 F        | 0.007199        |
| 5 C                                | 55 F        | 0.003101        |
| 6 C                                | 57 C        | 0.005214        |
| 7 C                                | 58 C        | 0.000673        |
| 9 C                                | 59 O        | 0.122090        |
| 10 C                               | 67 C        | 0.008908        |
| 11 C                               |             |                 |
| 12 C                               |             |                 |
| 13 C                               |             |                 |
| 15 C                               |             |                 |
| 17 C                               |             |                 |
| <b>18 C</b>                        |             | <b>0.137771</b> |
| 20 C                               |             |                 |
| 21 C                               |             |                 |
| 23 C                               |             |                 |
| <b>24 C</b>                        |             | <b>0.149915</b> |
| 25 C                               |             |                 |
| 26 C                               |             |                 |
| 28 C                               |             |                 |
| 30 C                               |             |                 |
| 32 C                               |             |                 |
| 36 C                               |             |                 |
| 40 N                               |             |                 |

|                                    |                      |
|------------------------------------|----------------------|
| SCF Done: E(RB3LYP) = -1850.992763 | 41 C -0.013043       |
| Charge: +3                         | 42 N 0.028704        |
| Multiplicity: 3                    | 43 B -0.003952       |
| Unpaired e <sup>-</sup> :          | <b>44 C 0.275114</b> |
| 2                                  | 45 C -0.068216       |
| Spin state: triplet                | 46 C 0.138670        |
| 1 O 0.126156                       | 47 C 0.122928        |
| 2 O 0.077308                       | 48 C 0.089172        |
| 3 N 0.059093                       | 49 C -0.021117       |
| 4 C 0.096902                       | 54 F 0.005423        |
| 5 C -0.017617                      | 55 F 0.004960        |
| 6 C -0.043539                      | 57 C 0.004804        |
| 7 C 0.116373                       | 58 C 0.000940        |
| 9 C 0.044748                       | 59 O 0.208327        |
| 10 C -0.033531                     | 67 C 0.014108        |
| 11 C -0.034397                     |                      |
| 12 C -0.036868                     |                      |
| 13 C 0.045266                      |                      |
| <b>15 C 0.291367</b>               |                      |
| 17 C 0.005025                      |                      |
| 18 C 0.075464                      |                      |
| 20 C -0.000568                     |                      |
| 21 C 0.208137                      |                      |
| 23 C 0.044241                      |                      |
| 24 C 0.081991                      |                      |
| 25 C 0.074615                      |                      |
| 26 C -0.036237                     |                      |
| 28 C -0.018670                     |                      |
| 30 C -0.093467                     |                      |
| 32 C 0.008105                      |                      |
| 36 C 0.006374                      |                      |
| 40 N 0.166909                      |                      |



## 10. Crystal data and structure refinement for compound 4aE

|                                   |                                                                                             |                 |
|-----------------------------------|---------------------------------------------------------------------------------------------|-----------------|
| Empirical formula                 | C <sub>32</sub> H <sub>26</sub> B <sub>2</sub> F <sub>9</sub> N <sub>3</sub> O <sub>2</sub> |                 |
| Formula weight                    | 677.18                                                                                      |                 |
| CCDC number                       | 2024041                                                                                     |                 |
| Temperature                       | 180.00(10) K                                                                                |                 |
| Wavelength                        | 1.54184 Å                                                                                   |                 |
| Crystal system                    | Triclinic                                                                                   |                 |
| Space group                       | P-1                                                                                         |                 |
| Unit cell dimensions              | a = 11.2245(5) Å                                                                            | α = 92.741(3)°  |
|                                   | b = 13.0227(5) Å                                                                            | β = 106.371(3)° |
|                                   | c = 13.7251(5) Å                                                                            | γ = 107.992(3)° |
| Volume                            | 1810.66(12) Å <sup>3</sup>                                                                  |                 |
| Z                                 | 2                                                                                           |                 |
| Density (calculated)              | 1.242 Mg/m <sup>3</sup>                                                                     |                 |
| Absorption coefficient            | 0.948 mm <sup>-1</sup>                                                                      |                 |
| F(000)                            | 692                                                                                         |                 |
| Crystal size                      | 0.28 x 0.162 x 0.014 mm <sup>3</sup>                                                        |                 |
| Theta range for data collection   | 3.393 to 73.657°                                                                            |                 |
| Index ranges                      | -13 ≤ h ≤ 12, -15 ≤ k ≤ 15, -14 ≤ l ≤ 16                                                    |                 |
| Reflections collected             | 17797                                                                                       |                 |
| Independent reflections           | 7062 [R(int) = 0.0201]                                                                      |                 |
| Completeness to theta = 67.684°   | 99.8%                                                                                       |                 |
| Absorption correction             | Gaussian                                                                                    |                 |
| Max. and min. transmission        | 1.000 and 0.488                                                                             |                 |
| Refinement method                 | Full-matrix least-squares on F <sup>2</sup>                                                 |                 |
| Data / restraints / parameters    | 7062 / 172 / 489                                                                            |                 |
| Goodness-of-fit on F <sup>2</sup> | 1.045                                                                                       |                 |
| Final R indices [I > 2σ(I)]       | R <sub>1</sub> = 0.0516, wR <sub>2</sub> = 0.1506                                           |                 |
| R indices (all data)              | R <sub>1</sub> = 0.0602, wR <sub>2</sub> = 0.1593                                           |                 |
| Extinction coefficient            | n/a                                                                                         |                 |
| Largest diff. peak and hole       | 0.496 and -0.350 e.Å <sup>-3</sup>                                                          |                 |

## Comments

The tetrafluoroborate was refined using two components. Restraints were used, same distances (SADI) restraints on 1-2 and 1-3 distances and rigid bond restraints (RIGU) on displacement parameters. An EADP constraint was also used between two close fluorine atoms. The  $\text{CF}_3$  group is also disordered and was refined using six fluorine atoms. Same distances (SADI) restraints were used on C–F distances and on the F–F distances of the low occupancy part. Rigid bond restraints were used on the displacement parameters. One EADP constraint was used between two close fluorine atoms. The squeeze/bypass<sup>[16]</sup> procedure was used to take care of disordered solvent. R before squeezing:  $R_1$  29.26% and  $wR_2$  0.6984. Both the electronic density before squeezing and the number of electrons found during the squeeze/bypass procedure hinted towards disordered dichloromethane molecules. One hole representing about 22 percent of the volume of the unit-cell was located containing 129 electrons, which could correspond to about 3 dichloromethane molecules. The solvent molecules were not added to the formula.

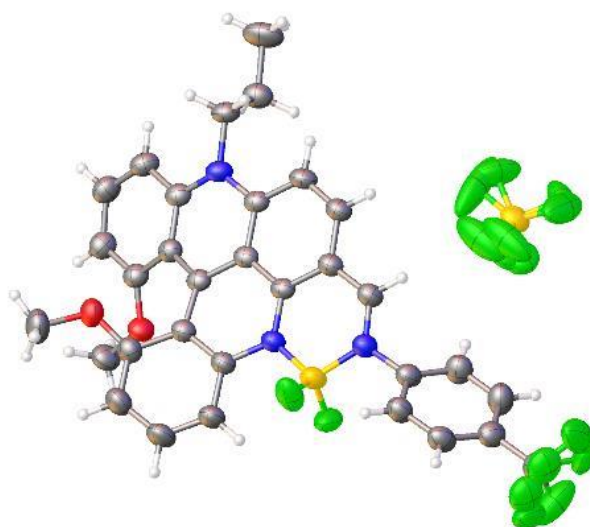

**Figure S9.** View of the asymmetric unit (displacement ellipsoids at 50 percent probability)

## 11. References

- [1] F. Zinna, T. Bruhn, C. A. Guido, J. Ahrens, M. Bröring, L. Di Bari, G. Pescitelli, *Chem. Eur. J.* **2016**, *22*, 16089-16098.
- [2] M. J. Frisch, G. W. Trucks, H. B. Schlegel, G. E. Scuseria, M. A. Robb, J. R. Cheeseman, G. Scalmani, V. Barone, B. Mennucci, G. A. Petersson, H. Nakatsuji, M. Caricato, X. Li, H. P. Hratchian, A. F. Izmaylov, J. Bloino, G. Zheng, J. L. Sonnenberg, M. Hada, M. Ehara, K. Toyota, R. Fukuda, J. Hasegawa, M. Ishida, T. Nakajima, Y. Honda, O. Kitao, H. Nakai, T. Vreven, J. A. Montgomery Jr., J. E. Peralta, F. Ogliaro, M. J. Bearpark, J. Heyd, E. N. Brothers, K. N. Kudin, V. N. Staroverov, R. Kobayashi, J. Normand, K. Raghavachari, A. P. Rendell, J. C. Burant, S. S. Iyengar, J. Tomasi, M. Cossi, N. Rega, N. J. Millam, M. Klene, J. E. Knox, J. B. Cross, V. Bakken, C. Adamo, J. Jaramillo, R. Gomperts, R. E. Stratmann, O. Yazyev, A. J. Austin, R. Cammi, C. Pomelli, J. W. Ochterski, R. L. Martin, K. Morokuma, V. G. Zakrzewski, G. A. Voth, P. Salvador, J. J. Dannenberg, S. Dapprich, A. D. Daniels, Ö. Farkas, J. B. Foresman, J. V. Ortiz, J. Cioslowski, D. J. Fox, Revision D.01 ed., Gaussian, Inc., Wallingford, CT, **2009**.
- [3] X. Li, M. J. Frisch, *J. Chem. Theory Comput.* **2006**, *2*, 835-839.
- [4] aC. Lee, W. Yang, R. G. Parr, *Phys. Rev. B: Condens. Matter* **1988**, *37*, 785-789; bA. D. Becke, *J. Chem. Phys.* **1993**, *98*, 5648-5652.
- [5] T. Yanai, D. P. Tew, N. C. Handy, *Chem. Phys. Lett.* **2004**, *393*, 51-57.
- [6] D. Andrae, U. Häußermann, M. Dolg, H. Stoll, H. Preuß, *Theor. Chim. Acta* **1990**, *77*, 123-141.
- [7] A. Höllwarth, M. Böhme, S. Dapprich, A. W. Ehlers, A. Gobbi, V. Jonas, K. F. Köhler, R. Stegmann, A. Veldkamp, G. Frenking, *Chem. Phys. Lett.* **1993**, *208*, 237-240.
- [8] R. Krishnan, J. S. Binkley, R. Seeger, J. A. Pople, *J. Chem. Phys.* **1980**, *72*, 650-654.
- [9] G. Scalmani, M. J. Frisch, *J. Chem. Phys.* **2010**, *132*, 114110.
- [10] W. Humphrey, A. Dalke, K. Schulten, *J. Mol. Graphics* **1996**, *14*, 33-38.
- [11] A. D. Becke, *Phys. Rev. A: At. Mol. Opt. Phys.* **1988**, *38*, 3098-3100.
- [12] G. M. Sheldrick, *Acta Crystallogr., Sect. A* **2015**, *71*, 3-8.
- [13] L. J. Bourhis, O. V. Dolomanov, R. J. Gildea, J. A. K. Howard, H. Puschmann, *Acta Crystallogr., Sect. A: Found.* **2015**, *71*, 59-75.
- [14] J. T. Reeves, M. D. Visco, M. A. Marsini, N. Grinberg, C. A. Busacca, A. E. Mattson, C. H. Senanayake, *Org. Lett.* **2015**, *17*, 2442-2445.
- [15] S. Morales, F. G. Guijarro, J. L. García Ruano, M. B. Cid, *J. Am. Chem. Soc.* **2014**, *136*, 1082-1089.
- [16] A. L. Spek, *Acta Crystallogr., Sect. C: Cryst. Struct. Chem.* **2015**, *71*, 9-18.
